# Multimodal modeling of neural network activity: computing LFP, ECoG, EEG and MEG signals with LFPy2.0

Espen Hagen<sup>1,a,c,\*</sup>, Solveig Næss<sup>1,b</sup>, Torbjørn V. Ness<sup>c</sup>, Gaute T. Einevoll<sup>a,c,\*\*</sup>

<sup>a</sup>Department of Physics, University of Oslo, Oslo, Norway

<sup>b</sup>Department of Informatics, University of Oslo, Oslo, Norway

<sup>c</sup>Faculty of Science and Technology, Norwegian University of Life Sciences, Ås, Norway

---

## Abstract

Recordings of extracellular electrical, and later also magnetic, brain signals have been the dominant technique for measuring brain activity for decades. The interpretation of such signals is however nontrivial, as the measured signals result from both local and distant neuronal activity. In volume-conductor theory the extracellular potentials can be calculated from a distance-weighted sum of contributions from transmembrane currents of neurons. Given the same transmembrane currents, the contributions to the magnetic field recorded both inside and outside the brain can also be computed. This allows for the development of computational tools implementing forward models grounded in the biophysics underlying electrical and magnetic measurement modalities.

LFPy ([LFPy.readthedocs.io](https://github.com/epshagen/lfpypy)) incorporated a well-established scheme for predicting extracellular potentials of individual neurons with arbitrary levels of biological detail. It relies on NEURON ([neuron.yale.edu](http://neuron.yale.edu)) to compute transmembrane currents of multicompartment neurons which is then used in combination with an electrostatic forward model. Its functionality is now extended to allow for modeling of networks of multicompartment neurons with concurrent calculations of extracellular potentials and current dipole moments. The current dipole moments are then, in combination with suitable volume-conductor head models, used to compute non-invasive measures of neuronal activity, like scalp potentials (electroencephalographic recordings; EEG) and magnetic fields outside the head (magnetoencephalographic recordings; MEG). One such built-in head model is the four-sphere head model incorporating the different electric conductivities of brain, cerebrospinal fluid, skull and scalp.

We demonstrate the new functionality of the software by constructing a network of biophysically detailed multicompartment neuron models from the Neocortical Microcircuit Collaboration (NMC) Portal ([bbp.epfl.ch/nmc-portal](http://bbp.epfl.ch/nmc-portal)) with corresponding statistics of connections and synapses, and compute *in vivo*-like extracellular potentials (local field potentials, LFP; electrocorticographical signals, ECoG) and corresponding current dipole moments. From the current dipole moments we estimate corresponding EEG and MEG signals using the four-sphere head model. We also show strong scaling performance of LFPy with different numbers of message-passing interface (MPI) processes, and for different network sizes with different density of connections.

The open-source software LFPy is equally suitable for execution on laptops and in parallel on high-performance computing (HPC) facilities and is publicly available on [GitHub.com](https://github.com/epshagen/lfpypy).

**Keywords:** Modeling, Neuron, Neuronal network, Simulation, local field potential, LFP, ECoG, EEG, MEG

---

\* correspondence: [espen.hagen@fys.uio.no](mailto:espen.hagen@fys.uio.no)

\*\* correspondence: [gaute.einevoll@nmbu.no](mailto:gaute.einevoll@nmbu.no)

<sup>1</sup> contributed equally to this work.

## 1. Introduction

Ever since the 1950s, electrical recordings with sharp electrodes have been the most important method for studying *in vivo* activity in neurons and neural networks [Li and Jasper, 1953]. In the last couple of decades, however, a host of new measurement methods has been developed and refined. One key development is the new generation of multicontact electrodes allowing for high-density electrical recordings across cortical laminae and areas, and the accompanying resurgence of interest in the low-frequency part of the extracellular signal, the 'local field potential' (LFP) [Buzsáki, 2004; Buzsáki et al., 2012; Einevoll et al., 2013]. The LFP is a population measure reflecting how dendrites integrate synaptic inputs, insight that cannot be obtained from measurement of spikes from a handful of neurons [Einevoll et al., 2013]. Many new optical techniques for probing cortical activity have also been developed. Of particular interest is *two-photon calcium imaging*, which can measure the action potentials of individual neurons deep into cortical tissue [Helmchen and Denk, 2005], and *voltage-sensitive dye imaging (VSDI)*, which measures the average membrane potential across dendrites close to the cortical surface [Grinvald and Hildesheim, 2004]. These add to the more established systems-level methods such as *electroencephalography (EEG)*, [Nunez and Srinivasan [2006]], which measures electrical potentials at the scalp, and *magnetoencephalography (MEG)*, [Hämäläinen et al. [1993]] which measures the magnetic field outside the head.

A standard way of analyzing such neurophysiological data has been to look for correlations between measurements and how the subject is stimulated or behaves. For example, most of what we have learned about neural representation of visual information in visual cortex has come from receptive-field studies where the correlation between measured spikes and presented visual stimuli is mapped out [Hubel and Wiesel, 1959]. The same approach has been used to map out the receptive fields for other sensory modalities (sound, touch, etc.), objects and celebrities [Quiroga et al., 2005], or the spatial location of the animal [O'Keefe and Dostrovsky, 1971; Hafting et al., 2005].

This purely statistical approach has limitations, however. For one, it only provides estimates for the neural representation and gives no direct insight into the circuit mechanisms giving rise to these representations. Secondly, the receptive field is inherently a *linear* measure of activity [Dayan and Abbott, 2001] and cannot in general capture non-linear network dynamics. The receptive field in primary visual cortex depends, for example, strongly on stimulation of the surrounding regions of visual space, an inherently non-linear effect [Blakemore and Tobin, 1972]. For other cortical measurements, such as the LFP or VSDI, a statistical analysis is further complicated by the fact that the signals reflect activity in neuron populations rather than individual neurons [Petersen et al., 2003; Einevoll et al., 2013]. This makes commonly-used statistical signal measures such as power spectra, correlation, coherence, and functional connectivity difficult to interpret in terms of activity in neurons and networks [Einevoll et al., 2013].

An alternative approach to a purely statistical analysis is, following in the tradition of physics, to formulate candidate hypotheses precisely in mathematics and then compute what each hypothesis would predict for the different types of measurements. Until now candidate cortical network models have typically only predicted spiking activity, thus preventing a proper comparison with measurements other than single-unit and multiunit recordings. To take full advantage of all available experiments, there is a need for biophysics-based forward-modeling tools for predicting other measurement modalities from candidate network models [Brette and Destexhe, 2012], that is, develop software that faithfully models the various types of measurements themselves. To facilitate the forward-modeling of extracellular potentials, both LFPs and spikes (i.e., either single-unit or multi-unit activity (MUA)), we developed LFPy (LFPy.readthedocs.io, Lindén et al. [2014]), a Python tool using the NEURON simulator [Carnevale and Hines, 2006] and its Python interface [Hines et al., 2009].

LFPy implements a well-established forward-modeling scheme where the extracellular potential is computed in a two-step process [Holt and Koch, 1999; Lindén et al., 2014]: First, the transmembrane currents of multicompartiment neuron models are computed using NEURON. Second, the extracellular potential is computed as a weighted sum over contributions from the transmembrane currents from each compartment with weights prescribed by volume-conductor theory for an infinite volume conductor. In LFPy these functions are provided by a set of Python classes that can be instantiated to represent the cell, synapses, stimulation de-

vices and extracellular electric measurement devices. By now this forward-model method has been used in a number of studies, for example to model extracellular spike waveforms [Holt and Koch, 1999; Gold et al., 2006, 2007; Pettersen and Einevoll, 2008; Pettersen et al., 2008; Franke et al., 2010; Schomburg et al., 2012; Thorbergsson et al., 2012; Reimann et al., 2013; Ness et al., 2015; Hagen et al., 2015; Miceli et al., 2017; Cserpán et al., 2017], LFP signals [Pettersen et al., 2008; Lindén et al., 2010, 2011; Gratiy et al., 2011; Makarova et al., 2011; Schomburg et al., 2012; Łęski et al., 2013; Reimann et al., 2013; Martín-Vázquez et al., 2013, 2015; Głąbska et al., 2014; Mazzoni et al., 2015; Tomsett et al., 2015; Sinha and Narayanan, 2015; Taxidis et al., 2015; Hagen et al., 2016; Głąbska et al., 2016; Ness et al., 2016; Hagen et al., 2017] and recently axonal LFP contributions [McColgan et al., 2017]. Some of these used LFPy to predict extracellular potentials [Łęski et al., 2013; Lindén et al., 2014; Hagen et al., 2015; Tomsett et al., 2015; Mazzoni et al., 2015; Ness et al., 2015, 2016; Hagen et al., 2016, 2017; Miceli et al., 2017], while in Heiberg et al. [2016] LFPy was used to construct a small-world LGN network without predictions of extracellular potentials. Further, in Uhlirova et al. [2016] LFPy was used to compute neuronal membrane potentials.

Here we present a substantially extended version of LFPy, termed LFPy2.0, including several new features, that is, support for (i) simulations of networks of multicompartmental neuron models, (ii) computation of LFP/MUA with anisotropic electrical conductivity, (iii) computation of LFP/MUA in the presence of step-wise varying electrical conductivity (such as at the interface between cortical gray matter and white matter), (iv) computation of ECoG signals (i.e., electrical potentials recorded at the cortical surface), (v) computation of EEG signals, and (vi) computation of MEG signals, see illustration in Fig. 1. To illustrate the computation of these measures by LFPy2.0 we show in Fig. 2 the LFP, EEG and MEG signals generated by a single synaptic input onto a single pyramidal neuron. As both electric and magnetic signals sum linearly, the recorded signals in real applications will stem from the sum of a large number of such contributions.

The manuscript is organized as follows: In [Methods](#) we first review the biophysical forward-modeling scheme used to predict extracellular potentials in different volume-conductor models. Then we describe calculations of current dipole moments and corresponding calculation of EEG and MEG signals. We further describe new LFPy classes and corresponding code examples for set-up of networks, the implementation of an example network using available data and biophysically detailed cell models from the Blue Brain Project's Neocortical Microcircuit Collaboration (NMC) Portal, and various technical details. In [Results](#) we investigate the outcome of our example parallel network simulation and corresponding measurements, and assess parallel performance of LFPy when running on HPC facilities. In [Discussion](#) we outline implications of this work and discuss possible future applications and developments of the software.

## 2. Methods

### 2.1. Multicompartment modeling

#### 2.1.1. Calculation of transmembrane currents

The origin of extracellular potentials is mainly transmembrane currents [Buzsáki et al., 2012; Einevoll et al., 2013], even though diffusion of ions in the extracellular space alone also can give rise to such potentials [Halgren et al., 2016]. In the presently (and frequently) used forward modeling approach, these transmembrane currents are obtained from spatially discretized multicompartment neuron models [De Schutter and Van Geit, 2009] which allow for high levels of biophysical and morphological detail. Such models have historically been used to model spatiotemporal variations in the membrane voltages  $V^m(x, t)$ , where  $x$  denotes the position along an unbranched piece of dendritic cable. From this cable theory it also follows that the transmembrane current density, that is, the transmembrane current per unit length of membrane, for any smooth and homogeneous cable section is given by [Koch, 1999]:

$$i^m(x, t) = \frac{1}{r^i} \frac{\partial^2 V^m(x, t)}{\partial x^2}, \quad (1)$$

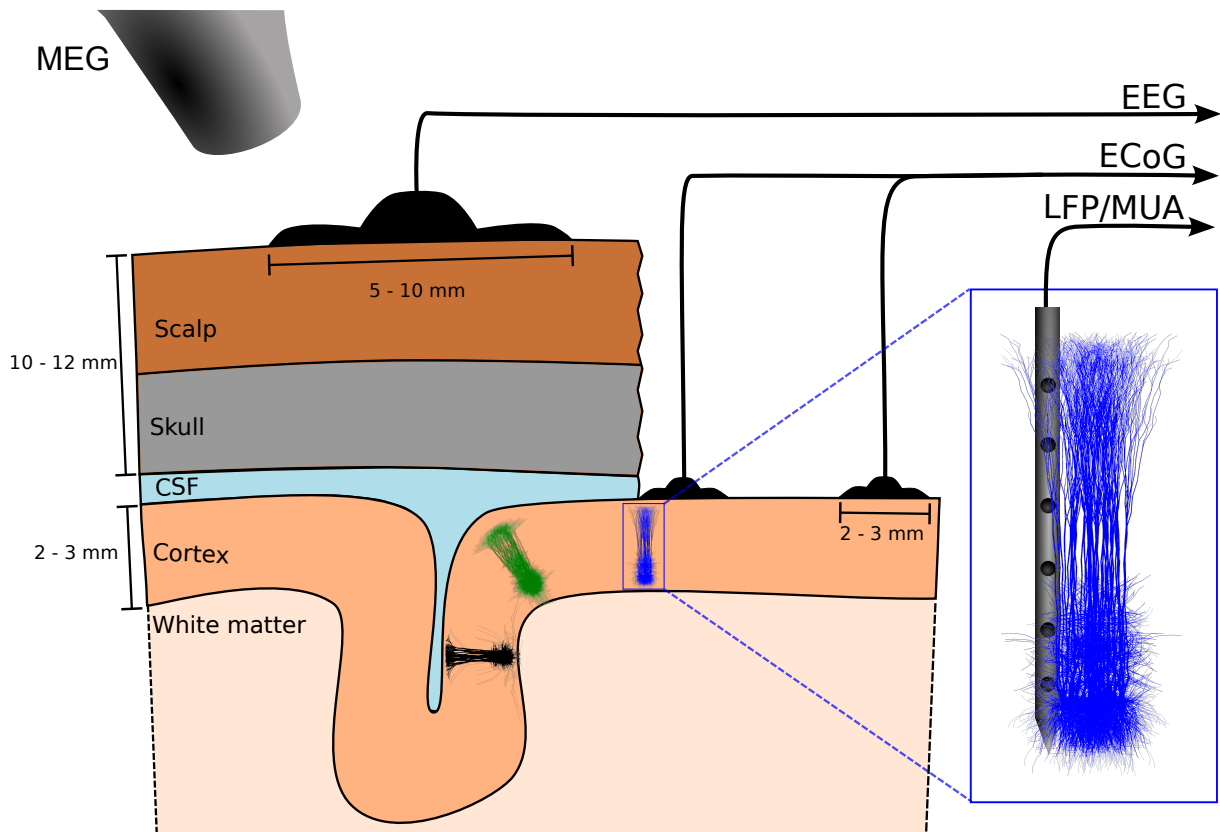

Figure 1: **Illustration of measurement signals computed by LFPy2.0.** The figure illustrates the EEG, ECoG, LFP/MUA (linear multi-electrode) and MEG recordings of electrical and magnetic signals stemming from populations of cortical neurons. Here three separate cortical populations are depicted. EEG electrodes are placed on the scalp, ECoG electrodes on the cortical surface, while the LFP and MUA both are recorded by electrodes placed inside cortex. In MEG the tiny magnetic fields stemming from brain activity is measured by SQUIDS placed outside the head. The MUA signal, that is, the high-frequency part of the recorded extracellular potential inside cortex, measures spikes from neurons in the immediate vicinity of the electrode contact, typically less than  $100 \mu\text{m}$  away [Buzsáki, 2004; Pettersen and Einevoll, 2008; Pettersen et al., 2008]. The 'mesoscopic' LFP and ECoG signals will typically contain information from neurons within a few hundred micrometers or millimetres from the recording contact [Einevoll et al., 2013], while the 'macroscopic' EEG and MEG signals will have contributions from cortical populations even further away [Nunez and Srinivasan, 2006; Hämäläinen et al., 1993].

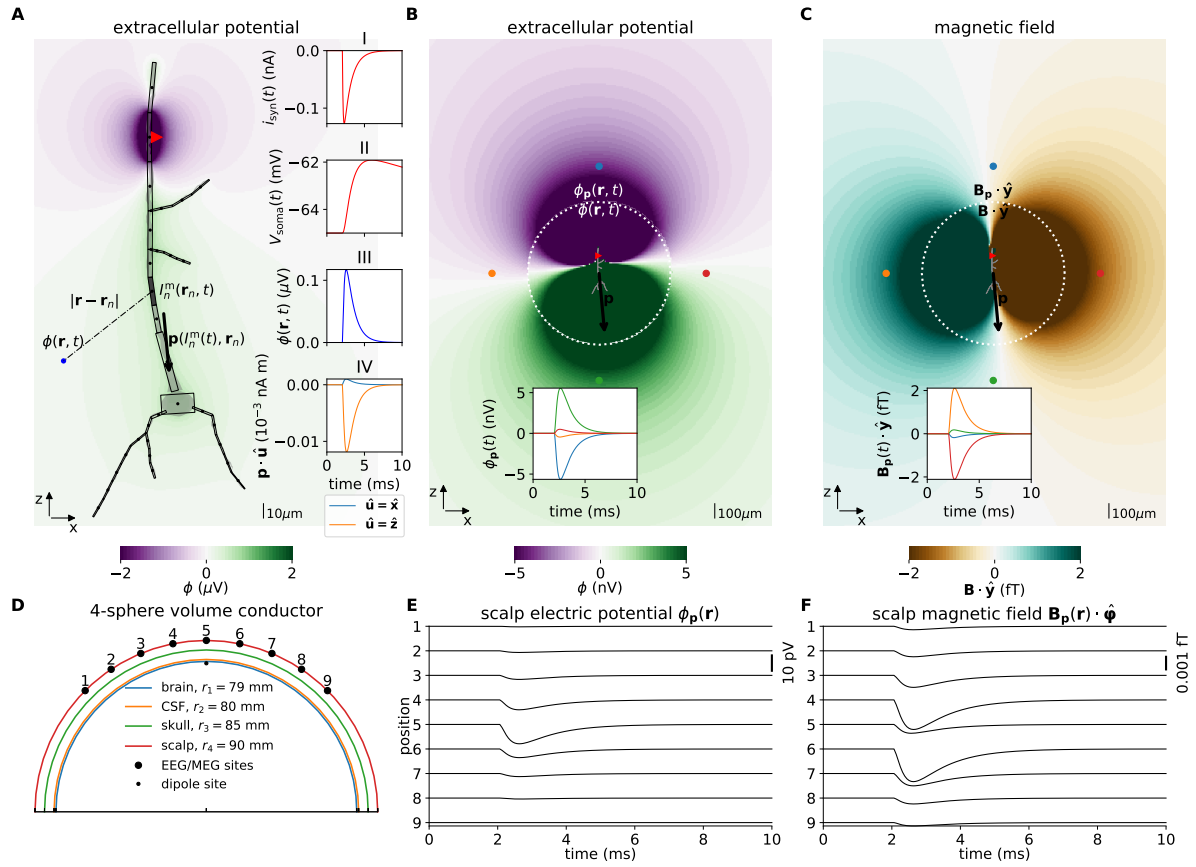

Figure 2: **Illustrations of forward model, dipole approximation, EEG and MEG model.** **A** Illustration of forward-modeling scheme for extracellular potentials from multicompartment neuron models. The gray shape illustrates a 3D-reconstructed neuron morphology and the equivalent discretized multicompartment model. A single synaptic input current  $i_{\text{syn}}(t)$  (red triangle, inset axes I) results in a deflection of the membrane voltage throughout the morphology, including at the soma ( $V_{\text{soma}}(t)$ , inset axes II). LFPY allows for computing extracellular potentials  $\phi$  in arbitrarily chosen extracellular locations  $\mathbf{r}$  (inset axes III) from transmembrane currents ( $I_n^m(\mathbf{r}_n, t)$ ), as well as the radial and tangential components of the current dipole moment  $\mathbf{p}$  (black arrow, inset axes IV). Compartments are indexed  $n$ ,  $\mathbf{r}_n$  denote compartment positions. The image plot shows the extracellular potential in the  $xz$ -plane at the time of the largest synapse current magnitude ( $t = 2.25$  ms). **B** Illustration of the extracellular electric potential, calculated both from the current dipole moment and transmembrane currents for the situation in panel A. Within a radius  $r < 500 \mu\text{m}$  from the 'center of areas' (see below) of the morphology the panel shows extracellular potentials  $\phi(\mathbf{r})$  predicted using the line-source method, while outside this radius the panel shows extracellular potentials  $\phi_p(\mathbf{r})$  predicted from the current dipole moment ( $\mathbf{p}$ , black arrow). Here, an assumption of an infinite, homogeneous (same everywhere) and isotropic (same in all directions) extracellular conductivity was used. The 'center of areas' was defined as  $\sum_{n=1}^{n_{\text{seg}}} A_n \mathbf{r}_n / \sum_{n=1}^{n_{\text{seg}}} A_n$  where  $A_n$  denotes compartment surface area. The time  $t = 2.25$  ms as in panel A. The inset axis shows the potential as function of time in the four corresponding locations (at  $|\mathbf{R}| = 750 \mu\text{m}$ ) surrounding the morphology (colored circular markers). **C** Visualization of magnetic field component  $\mathbf{B}_p \cdot \hat{\mathbf{y}}$  ( $y$ -component) computed from the current dipole moment, outside a circle of radius  $r = 500 \mu\text{m}$  (as in panel B). Inside the circle, we computed the same magnetic field component from axial currents inside each compartment. The inset axis shows the  $y$ -component of the magnetic field as function of time in the four corresponding locations (at  $|\mathbf{R}| = 750 \mu\text{m}$ ) surrounding the morphology (circular markers). **D** Illustration of upper half of the four-sphere head model used for predictions of EEG scalp potentials from electric current dipole moments. Each spherical shell with outer radii  $r \in \{r_1, r_2, r_3, r_4\}$  has piecewise homogeneous and isotropic conductivity  $\sigma_e \in \{\sigma_1, \sigma_2, \sigma_3, \sigma_4\}$ . The EEG/MEG sites numbered 1-9 mark the locations where electric potentials and magnetic fields are computed, each offset by an arc length of  $r_4 \pi / 16$  in the  $xz$ -plane. The current dipole position was  $\theta = \varphi = 0$ ,  $r = 78$  mm (in spherical coordinates). **E** Electric potentials on the outer scalp-layer positions 1-9 in panel D. **F** Tangential component of the magnetic field  $\mathbf{B}_p \cdot \hat{\varphi}$  in positions 1-9. (Note that at position 5, the unit vector  $\hat{\varphi}$  is defined to be directed in the positive  $y$ -direction.)

93 where  $r^i$  represents the axial resistance per unit length along the cable. Assuming a homogeneous current  
 94 density per unit length  $i^m$  along a single compartment with length  $\Delta s$ , the total transmembrane current  $I^m =$   
 95  $i^m \Delta s$ .

96 As in the first release of LFPy [Lindén et al., 2014], we rely on the NEURON simulation environment  
 97 [Carnevale and Hines, 2006] to compute transmembrane currents. As of NEURON v7.4, a faster and direct  
 98 method of accessing transmembrane currents is provided through its `CVode.use_fast_imem()` method,  
 99 which we now utilize in an exclusive manner. NEURON's 'extracellular' mechanism is thus no longer used  
 100 to predict extracellular potentials (cf. Lindén et al. [2014, sec. 5.6]). Note, however, that this mechanism it-  
 101 self is still used when an external extracellular potential is imposed as a boundary condition outside each  
 102 compartment using the `Cell.insert_v_ext()` class method.

### 103 2.1.2. Calculation of axial currents

104 To compute the magnetic fields stemming from electrical activity in neurons, the axial currents within cells  
 105 are needed [Hämäläinen et al., 1993]. The axial current for the cable is given by [Koch, 1999]:

$$I^a(x, t) = -\frac{1}{r^i} \frac{\partial V^m(x, t)}{\partial x}. \quad (2)$$

106 Assuming homogeneous axial current density between the midpoints of two neighboring compartments  $n$  and  
 107  $n + 1$  along the cable, one may obtain the axial current from Ohm's law:

$$I_{n,n+1}^a(t) = \frac{V_{n+1}^m(t) - V_n^m(t)}{r_{n,n+1}^i \Delta s_{n,n+1}} = \frac{V_{n+1}^m(t) - V_n^m(t)}{R_{n,n+1}^i}. \quad (3)$$

108 Here,  $V_n^m$  and  $V_{n+1}^m$  are the compartment midpoint membrane potentials,  $r_{n,n+1}^i$  the axial resistance per unit  
 109 length between the two compartments,  $\Delta s_{n,n+1}$  the distance between compartment midpoints and  $R_{n,n+1}^i$   
 110 the corresponding axial resistance.

111 Further, we outline how axial currents from complex reconstructed neuron morphologies are calculated in  
 112 LFPy2.0, and provide the technical implementation details in Algorithm 1 below. For a more comprehensive  
 113 explanation, see Næss [2015]. The corresponding implementation is in LFPy2.0 provided by the class method  
 114 `Cell.get_axial_currents_from_vmem()`.

115 In NEURON, a *section* is a continuous piece of cable split into an arbitrary number of *segments* (com-  
 116 partments) indexed by  $n$ . Morphologies with branch points must therefore be represented by more than one  
 117 section. We here denote the relative length from start to end point of each section by  $\chi \in [0, 1]$ , see Fig 3A.  
 118 All segments within the morphology except the initial segment of the *root* section (typically the somatic sec-  
 119 tion) have a *parent* segment indexed by  $f$ . Each segment in a section can have an arbitrary number of *child*  
 120 segments, thus a parent segment is the segment which connects to the start point of a *child* segment. We  
 121 also distinguish between start-, mid- and end-point coordinates of each segment (Fig 3A).

122 In Fig 3B and C we illustrate the simplest possible calculation of axial current between the midpoints of  
 123 two neighboring segments  $f$  and  $n$  belonging to the same section. Their corresponding membrane voltages  
 124 are  $V_f^m$  and  $V_n^m$ , separated by a total (series) axial resistance  $R_{fn}^i$ . From NEURON we can easily obtain the  
 125 axial resistance between the segment midpoint and the segment's parent node. The parent node is here the  
 126 midpoint of the parent segment, as the child and parent belong to the same section. Therefore, NEURON  
 127 gives us the total axial resistance  $R_{fn}^i$  directly, in this case. The axial current magnitude between segment  
 128 midpoints is then trivial to compute using Ohm's law (Eq (3)), but as the currents flowing within segments  $f$   
 129 and  $n$  may not lie on the same axis, we differentiate between the current magnitudes  $I_m^a$  and  $I_{m+1}^a$ , their axial  
 130 line element vectors  $\mathbf{d}_m$  and  $\mathbf{d}_{m+1}$ , and the midpoints of each  $\mathbf{r}_m$  and  $\mathbf{r}_{m+1}$  (panel B). The corresponding  
 131 current indices are denoted by  $m$  and  $m + 1$  as detailed in Algorithm 1.

132 Panel D represents the case where the parent and child segments  $f$  and  $n$  belong to different sections.  
 133 The child segment is here the *bottom segment* in a section, and it is connected to the end point of  $f$ . As

134 the parent node (the node the child segment connects to on the parent segment) is here located between  
 135 the two segments, NEURON does in this case not give us the total axial resistance directly. Instead, the total  
 136 (series) axial resistance  $R_{fn}^i = R_f^i + R_n^i$  must first be computed to estimate the axial current.  $R_f^i$  is here the  
 137 resistance between the parent midpoint and the connecting node, and  $R_n^i$  the resistance between the parent  
 138 node and the segment midpoint.

139 NEURON allows child sections to be connected anywhere along the parent section:  $0 \leq \chi \leq 1$ . Illustrated  
 140 in panel E, a child segment is connected to the point  $\chi = 0.5$  and the axial resistance in the parent segment  
 141 does not enter the calculation of axial current magnitude. LFPy2.0 still accounts for a virtual axial current  $I_m^a$   
 142 from the parent mid point to the child start point. These virtual currents ensure that the total current dipole  
 143 moments computed either from transmembrane currents or from axial currents are identical (see Section 2.3.1  
 144 for details).

145 At morphology branch points, several child segments may protrude from a parent segment as illustrated in  
 146 panel F. As the segment  $n$  and its sibling  $\tilde{n}$  both share the same parent  $f$ , we estimate the potential  $V_\chi^m$  at the  
 147 branch node using Ohm's law and Kirchhoff's current law, accounting for the axial resistivities ( $R_f^i, R_n^i, R_{\tilde{n}}^i$ )  
 148 and potentials ( $V_f^m, V_n^m, V_{\tilde{n}}^m$ ), in order to compute the corresponding axial currents  $I_m^a$  and  $I_{m+1}^a$ . The full  
 149 procedure presently used for computing axial currents in LFPy2.0 for the cases illustrated in panels B–F is  
 150 provided in full detail in Algorithm 1.

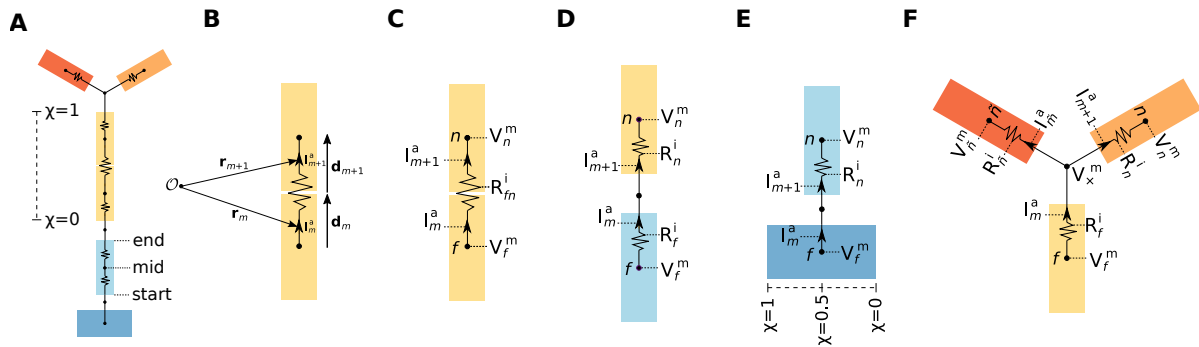

Figure 3: **Axial currents in multicompartment neuron models.** **A** Schematic illustration of sections (colored rectangles), segments and equivalent electric circuit of a simplified multicompartment neuron model. The relative length  $\chi$  varies between 0 and 1 from start- to end-point of each section. **B** Axial current line element vectors ( $\mathbf{d}_m, \mathbf{d}_{m+1}$ ) and corresponding midpoints ( $\mathbf{r}_m, \mathbf{r}_{m+1}$ ) of axial currents ( $I_m^a, I_{m+1}^a$ ) between two connected segments. **C** Axial currents ( $I_m^a, I_{m+1}^a$ ), membrane potentials ( $V_f^m, V_n^m$ ), and axial resistance ( $R_{fn}^i$ ) in equivalent electric circuit for a parent segment  $f$  and child segment  $n$  in a single section. **D** Similar to panel B, but parent and child segments belong to two different sections. The total series resistance is here  $R_f^i + R_n^i$ . **E** Illustration of the case where the child segment  $n$  is connected to a point  $\chi = 0.5$  on the parent section. For children connected at  $\chi \in (0, 1)$  the voltage difference ( $V_n^m - V_f^m$ ) is only across the child segment axial resistance  $R_n^i$ , but the (virtual) current from the node connecting the child start point to the parent midpoint  $I_m^a$  is still accounted for. **F** Illustration of axial currents at branch point between different sections of the morphology. The child segment  $n$  has one parent  $f$  and one sibling indexed by  $\tilde{n}$ , where  $V_\chi^m$  denotes the virtual membrane potential at the node connecting the parent end-point to the children start-points.  $V_n^m$  is the voltage in the midpoint of the sibling segment, while  $R_n^i$  and  $I_m^a$  denotes the axial resistance and current between the sibling midpoint and the branch point.

---

**Algorithm 1** Axial current calculations in LFPy2.0

---

```

1: children = dict. of child indices  $n$  of each parent section  $sec$ 
2: connections = dict. of relative location  $\chi \in [0, 1]$  where children connect onto parent section
3:  $\mathbf{R}^i$  = list of axial resistances of child segments to corresponding parent nodes
4:  $\mathbf{V}^m$  = list of membrane potentials at midpoints of each segment
5: Initialize length  $2(n^{seg} - 1)$  lists  $\mathbf{I}^a$ ,  $\mathbf{d}$  and  $\mathbf{r}$  indexed by  $m \in \{0, 1, \dots, 2(n^{seg} - 1) - 1\}$ 
6: set current and segment indices  $m = n = 0$ 
7: set root_sec = True
8: for sec in neuron morphology do
9:   if sec has parent section then
10:    set parent segment index  $f$  from children and connections
11:    set init_seg = True and root_sec = False
12:   if count(children[sec]) > 1 then
13:     set branch = True
14:   set  $\chi$  = connections[sec]
15:   for seg in sec do
16:     if root_sec then
17:       set  $n = 1$  and  $f = 0$ 
18:       set init_seg = False and root_sec = False
19:       continue
20:     set  $R_{fn}^i = \mathbf{R}^i[n]$ 
21:     set  $V_f^m = \mathbf{V}^m[f]$ 
22:     set  $V_n^m = \mathbf{V}^m[n]$ 
23:     if not init_seg or  $0 < \chi < 1$  then
24:       compute  $\mathbf{I}^a[m] = (V_f^m - V_n^m)/R_{fn}^i$  (see Fig 3B,C,E)
25:     else
26:       set  $R_n^i = \mathbf{R}^i[n]$  (axial resistance from mid to start point of segment  $n$ )
27:       set  $R_f^i$  (axial resistance from end to mid point of parent segment  $f$ )
28:       if not branch then
29:         compute  $\mathbf{I}^a[m] = (V_f^m - V_n^m)/(R_f^i + R_n^i)$  (see Fig 3D)
30:       else
31:         compute branch point potential

$$V_x^m = \frac{\sum_h V_h^m/R_h^i}{\sum_h 1/R_h^i} \text{ for } h \in \{f, n_1, n_2, \dots, n_{children}\}$$

32:         compute  $\mathbf{I}^a[m] = (V_x^m - V_n^m)/R_n^i$  (see Fig 3F)
33:       set  $\mathbf{I}^a[m+1] = \mathbf{I}^a[m]$ 
34:       compute  $\mathbf{d}[m]$  by subtracting the midpoint of  $f$  from the start point of  $n$ 
35:       compute  $\mathbf{d}[m+1]$  by subtracting the start point of  $n$  from the midpoint of  $n$ 
36:       compute  $\mathbf{r}[m]$  by subtracting  $0.5 \cdot \mathbf{d}[m]$  from the start point of  $n$ 
37:       compute  $\mathbf{r}[m+1]$  by subtracting  $0.5 \cdot \mathbf{d}[m+1]$  from the midpoint of  $n$ 
38:       set  $f = n$ 
39:       set  $n = n + 1$ 
40:       set  $m = m + 2$ 
41:       set branch = False
42:       set init_seg = False

```

---



151 **2.2. Forward modeling of LFP and MUA signals**

152 The relation between transmembrane currents and extracellular potentials is calculated based on volume  
 153 conduction theory [Nunez and Srinivasan, 2006; Einevoll et al., 2013]. At the relatively low frequencies relevant  
 154 in neurophysiology (below a few thousand hertz), this derivation is simplified by omitting terms with time  
 155 derivatives in Maxwell's equations (quasistatic approximation, Hämäläinen et al. [1993, p. 426]). Further, the  
 156 extracellular medium is in all situations considered below assumed to be ohmic, that is, linear and frequency-  
 157 independent [Pettersen et al., 2012; Einevoll et al., 2013; Miceli et al., 2017].

158 **2.2.1. Homogeneous and isotropic media**

159 We first consider the simplest situation, where the medium is *homogeneous*, i.e., the same in all positions  
 160 corresponding to an infinite volume conductor, and *isotropic*, i.e., the same electrical conductivity in all direc-  
 161 tions. The medium is then represented by a scalar extracellular conductivity  $\sigma_e$ . The extracellular potential  
 162  $\phi(\mathbf{r}, t)$  at position  $\mathbf{r}$  and time  $t$  is then given by [Nunez and Srinivasan, 2006; Lindén et al., 2014]

$$\phi(\mathbf{r}, t) = \frac{1}{4\pi\sigma_e} \frac{I(t)}{|\mathbf{r} - \mathbf{r}'|}, \quad (4)$$

163 where  $I(t)$  represents a time-varying point current source at position  $\mathbf{r}'$ . For transmembrane currents  $I_{jn}^m(t)$   
 164 of individual compartments  $n \in [1, n_j^{\text{seg}}]$  of all cells  $j$  in a population of  $N$  cells, the extracellular potential can  
 165 be computed as the linear sum of their contributions as

$$\phi(\mathbf{r}, t) = \frac{1}{4\pi\sigma_e} \sum_{j=1}^N \sum_{n=1}^{n_j^{\text{seg}}} \frac{I_{jn}^m(t)}{|\mathbf{r} - \mathbf{r}_{jn}|}, \quad (5)$$

166 but only under the assumption that each transmembrane current can be represented as a discrete point in  
 167 space. This point-source assumption can be used in LFPy by supplying the keyword argument and value  
 168 `method="pointsource"` to the `RecExtElectrode` class [Lindén et al., 2014].

As a homogeneous current distribution along each cylindrical compartment is assumed, we may employ  
 the *line-source* approximation for somatic and dendritic compartments [Holt and Koch, 1999]. The formula is  
 obtained by integrating Eq (4) along the center axis of each cylindrical compartment  $n$ , and by summing over  
 contributions from every  $n_j^{\text{seg}}$  compartment of all  $N$  cells [Holt and Koch, 1999; Pettersen and Einevoll, 2008;  
 Lindén et al., 2014]:

$$\begin{aligned} \phi(\mathbf{r}, t) &= \frac{1}{4\pi\sigma_e} \sum_{j=1}^N \sum_{n=1}^{n_j^{\text{seg}}} I_{jn}^m(t) \int \frac{1}{|\mathbf{r} - \mathbf{r}_{jn}|} d\mathbf{r}_{jn} \\ &= \frac{1}{4\pi\sigma_e} \sum_{j=1}^N \sum_{n=1}^{n_j^{\text{seg}}} \frac{I_{jn}^m(t)}{\Delta s_{jn}} \ln \left| \frac{\sqrt{h_{jn}^2 + r_{\perp jn}^2} - h_{jn}}{\sqrt{l_{jn}^2 + r_{\perp jn}^2} - l_{jn}} \right|. \end{aligned} \quad (6)$$

169 Compartment length is denoted  $\Delta s_{jn}$ , perpendicular distance from the electrode point contact to the axis of  
 170 the line compartment is denoted  $r_{\perp jn}$ , longitudinal distance measured from the start of the compartment is  
 171 denoted  $h_{jn}$ , and longitudinal distance from the other end of the compartment is denoted  $l_{jn} = \Delta s_{jn} + h_{jn}$ .  
 172 The corresponding keyword argument and value to class `RecExtElectrode` is `method="linesource"`  
 173 [Lindén et al., 2014].

174 A final option in LFPy is however to approximate the typically more rounded soma compartments as  
 175 spherical current sources, thus the line-source formula (Eq (6)) for dendrite compartments is combined with  
 176 the point-source equation (Eq (4)), obtaining [Lindén et al., 2014]:

$$\begin{aligned}\phi(\mathbf{r}, t) &= \frac{1}{4\pi\sigma_e} \sum_{j=1}^N \left( \frac{I_{j,\text{soma}}^m(t)}{|\mathbf{r} - \mathbf{r}_{j,\text{soma}}|} + \sum_{n=2}^{n_j^{\text{seg}}} \int \frac{I_{jn}^m(t)}{|\mathbf{r} - \mathbf{r}_{jn}|} d\mathbf{r}_{jn} \right) \\ &= \frac{1}{4\pi\sigma_e} \sum_{j=1}^N \left( \frac{I_{j,\text{soma}}^m(t)}{|\mathbf{r} - \mathbf{r}_{j,\text{soma}}|} + \sum_{n=2}^{n_j^{\text{seg}}} \frac{I_{jn}^m(t)}{\Delta s_{jn}} \ln \left| \frac{\sqrt{h_{jn}^2 + r_{\perp jn}^2} - h_{jn}}{\sqrt{l_{jn}^2 + r_{\perp jn}^2} - l_{jn}} \right| \right).\end{aligned}\quad (7)$$

177 The corresponding keyword argument and value is `method="soma_as_point"`.

178 If the distance between current sources and electrode contacts is smaller than the radius of the segment,  
179 unphysical singularities may occur in the computed extracellular potential. Singularities are in LFPy automati-  
180 cally prevented by either setting  $r_{\perp jn}$  or  $|\mathbf{r} - \mathbf{r}_{jn}|$  equal to the cylindrical compartment radius dependent on  
181 the choice of line or point sources.

182 Electrode contacts of real recording devices have finite spatial extents. A good approximation to the electric  
183 potential across the uninsulated surface of metal electrode contact is obtained by computing the spatially  
184 averaged electric potential [Robinson, 1968; Nelson et al., 2008; Nelson and Pouget, 2010; Ness et al.,  
185 2015], in particular for current sources being located at distances larger than approximately one electrode  
186 radius [Ness et al., 2015]. The *disc-electrode* approximation to the potential [Camuñas-Mesa and Quiroga,  
187 2013; Lindén et al., 2014; Ness et al., 2015]

$$\phi_{\text{disc}}(\mathbf{u}, t) = \frac{1}{A_S} \iint_S \phi(\mathbf{u}, t) d^2r \approx \frac{1}{m} \sum_{h=1}^m \phi(\mathbf{u}_h, t), \quad (8)$$

188 is incorporated in LFPy, with corresponding parameters for contact radius  $r_{\text{contact}}$ , number  $m$  of random points  
189  $\mathbf{u}_h$  on the flat, circular electrode contact surface when averaging [Lindén et al., 2014]. The surface normal  
190 vector for each electrode contact must also be specified.

### 191 2.2.2. Discontinuous and isotropic media

192 Above we described the case for an infinite volume conductor, that is, a constant extracellular conductivity  
193  $\sigma_e$ , as implemented in the initial LFPy release [Lindén et al., 2014]. For cases where  $\sigma_e$  vary with position,  
194 i.e.,  $\sigma_e = \sigma_e(\mathbf{r})$ , such as for cortical *in vivo* recordings close to the cortical surface [Einevoll et al., 2007] or *in*  
195 *vitro* recordings using microelectrode arrays (MEAs) [Ness et al., 2015], this approximation does not generally  
196 hold. Instead a generalized Poisson equation must be solved [Nicholson and Freeman, 1975]:

$$\nabla \cdot (\sigma_e(\mathbf{r}) \nabla \phi(\mathbf{r}, t)) = -C(\mathbf{r}, t), \quad (9)$$

197 where  $C(\mathbf{r}, t)$  is the current-source density. This equation can always be solved numerically by means of the  
198 Finite Element Method (FEM) [McIntyre and Grill, 2001; Ness et al., 2015] or other mesh-based methods (see  
199 for example Tveito et al. [2017]).

200 In the special case where the conductivity  $\sigma_e$  is discontinuous in a single direction, that is, a constant con-  
201 ductivity in the  $xy$ -plane and a piecewise constant  $\sigma_e(z)$  in the  $z$ -direction, the ‘Method-of-Images’ (Mol) can  
202 be used to make analytical formulas for the extracellular potentials, analogous to Eq (4)–Eq (7) above [Nichol-  
203 son and Llinas, 1971; Nunez and Srinivasan, 2006]. When applicable, these formulas substantially simplify  
204 the modeling of the extracellular potentials compared to FEM modeling.

205 *Electrical potentials across microelectrode arrays (MEAs)*. The first Mol application is to model recordings  
206 in a MEA setting where a slice of brain tissue is put on an insulating recording chip (MEA-chip) and covered  
207 with saline [Ness et al., 2015; Hagen et al., 2015]. In this three-layer situation separate conductivity values  
208 are assigned to the topmost saline layer conductivity  $\sigma_S$  for  $z \in [h, \infty]$ , the middle tissue layer conductivity  $\sigma_T$

209 for  $z \in [0, h)$  and the lowermost electrode  $\sigma_G$  for  $z \in [-\infty, 0)$ . The parameter  $h$  denotes the thickness of the  
210 middle tissue layer. The corresponding implementation is provided by the class `RecMEAElectrode`, and has  
211 at present the limitations that all current sources (segments) must be contained on the interval  $z \in [0, h)$ , and  
212 that the line-source approximation can only be used when  $\sigma_G = 0$  and when computing extracellular potentials  
213 for  $z = 0$ . For other forward-model configurations (for example for  $0 \leq z \leq h$  and/or  $\sigma_G > 0$ ) the point-source  
214 approximation can be used. For a detailed derivation of the Mol with two planar electrical boundaries, see  
215 Eq. (4) in [Ness et al. \[2015\]](#). A corresponding example is provided with LFPy2.0 (`example_MEA.py`) which  
216 illustrates the computation of extracellular potentials as recorded by a MEA following synaptic activation of a  
217 pyramidal cell model.

218 *Electrical potentials close to cortical surface.* The second Mol application is to model *in vivo* recordings of  
219 electrical potentials at or immediately below the cortical surface, that is, the interface between cortical gray  
220 matter and dura. Here the extracellular conductivity above the cortical surface  $\sigma_S$  can be higher or lower  
221 than the conductivity in cortical gray matter  $\sigma_T$  depending on how the measurements are done, for example  
222 whether saline or oil is used to cover an inserted laminar electrode [\[Einevoll et al., 2007\]](#). Such a conductivity  
223 jump will affect both the electrical potential recorded at the cortical surface (ECoG recording) as well as the  
224 potentials recorded in the top cortical layers [\[Pettersen et al., 2006\]](#). This can be modeled with the same  
225 framework as above, that is, by using the class `RecMEAElectrode`, with the cortical surface at height  $h$ ,  
226 while ignoring the lower planar boundary by setting  $\sigma_G = \sigma_T$ . In this situation the potential at or below the  
227 cortical surface at position  $(x, y, z)$  for a current source,  $I(t)$ , positioned at  $(x', y', z')$  is given by [\[Pettersen](#)  
228 [et al., 2006; Nunez and Srinivasan, 2006; Ness et al., 2015\]](#) as:

$$\phi(x, y, z, t) = \frac{I(t)}{4\pi\sigma_T} \left( \frac{1}{\sqrt{(x-x')^2 + (y-y')^2 + (z-z')^2}} + \frac{\sigma_T - \sigma_S}{\sigma_T + \sigma_S} \frac{1}{\sqrt{(x-x')^2 + (y-y')^2 + (z+z'-2h)^2}} \right). \quad (10)$$

229 This approach assumes a flat cortical surface. Note, however, that in LFPy2.0 the ECoG signal can also be  
230 modeled by means of the four-sphere EEG head model as described below in Sec. 2.3.4. An example is  
231 provided with LFPy2.0 (`example_ECoG.py`) which illustrates extracellular potentials recorded in the cortex  
232 and at the cortical surface following activation of multiple synapses distributed across a pyramidal cell model.

233 *Electrical potentials in spherical conductor.* LFPy2.0 also incorporates a spherical conductor model, adapted  
234 from [\[Deng, 2008\]](#), where the conductivity is constant within the sphere and zero outside (class  
235 `OneSphereVolumeConductor`). Note that this model is applicable for monopolar current sources, unlike  
236 the more complex multi-sphere head models described below in Section 2.3 which only apply to dipolar  
237 current sources. Although not pursued here, one application of this volume-conductor model could possibly  
238 be modeling of LFPs measured in spheroidal brain nuclei.

### 239 2.2.3. Homogeneous and anisotropic media

240 For homogeneous media, i.e., when the extracellular conductivity is the same at all positions, we also  
241 added support for anisotropic media [\[Nicholson and Freeman, 1975\]](#). In this case the extracellular conduc-  
242 tivity in Eq (9) must be replaced by a rank 2 (3x3) tensor where the diagonal elements are  $\sigma_x$ ,  $\sigma_y$ , and  $\sigma_z$   
243 and the off-diagonal elements are zero [\[Nicholson and Freeman, 1975\]](#). This could for example be used to  
244 mimic experimental observations of such anisotropy in cortex [\[Goto et al., 2010\]](#), that is, electric currents flow  
245 with less resistance along the depth direction ( $z$ -direction) than in the lateral directions ( $x, y$ -directions). In  
246 this case  $\sigma_z > \sigma_x = \sigma_y$  [\[Ness et al., 2015\]](#). The corresponding implementation is based on the descrip-  
247 tion and implementation provided by [Ness et al. \[2015\]](#), and is in LFPy presently supported by the class  
248 `RecExtElectrode`, but not the class `RecMEAElectrode`.

### 249 2.3. Forward modeling of EEG, ECoG, and MEG signals from current dipoles

250 The forward modeling of EEG and MEG signals from current dipoles has a long history [Hämäläinen et al.,  
251 1993; Nunez and Srinivasan, 2006]. Here the EEG contacts and the MEG magnetometers are located so far  
252 away from the neural sources that only the current dipole moments contribute to the measured signals, that is,  
253 the contributions from higher-order current multipoles are negligible. From charge conservation, it follows that  
254 current monopoles do not exist. To compute the contribution to EEG and MEG signals from detailed neuron  
255 models, we thus first need to compute single-neuron current dipole moments, cf. Sec. 2.3.1. Next these must  
256 be combined with appropriate volume-conductor models for the head.

257 In LFPy2.0 we include two ‘head’ models for computing EEG signals from current dipole moments: the  
258 (very simplified) infinite homogenous volume-conductor model (Sec. 2.3.2), and the much more involved four-  
259 sphere head model where the brain tissue, cerebrospinal fluid (CSF), skull and scalp are represented with  
260 different values for the electrical conductivity [Nunez and Srinivasan, 2006; Næss et al., 2017], cf. Sec. 2.3.3.  
261 For the MEG signals the forward model is simpler as the magnetic permeability is the same throughout the  
262 head as in free space [Hämäläinen et al., 1993]. In LFPy2.0 we include simulation code for computing neural  
263 contributions to MEG signals applicable for all head models with spherically-symmetric electrical conduc-  
264 tivities, for example, the four-sphere head model, cf. Sec. 2.3.5. While these head models allow for direct  
265 calculation of EEG and MEG signals from neurons, it should be noted the computed current dipole moments  
266 also can be used for subsequent calculation of EEG and MEG signals by means of boundary element (BEM)  
267 or finite element models (FEM) with anatomically detailed head models [DeMunck et al., 2012; Bangera et al.,  
268 2010; He et al., 2002; Huang et al., 2016].

#### 269 2.3.1. Calculation of current dipole moments

270 *Current dipole moments from transmembrane currents.* The current dipole moment from a single neuron can  
271 be computed from transmembrane currents as [Lindén et al., 2010]:

$$\mathbf{p}(t) = \sum_{n=1}^{n^{\text{seg}}} \mathbf{r}_n I_n^{\text{m}}(t), \quad (11)$$

272 where  $I_n^{\text{m}}$  is the transmembrane current at time  $t$  from compartment  $n$  at position  $\mathbf{r}_n$ . For a population of  $N$   
273 cells with  $n_j^{\text{seg}}$  compartments each, the current dipole moment at discrete time steps can be formulated as  
274 the matrix product:

$$\begin{bmatrix} p_x(0) & p_y(0) & p_z(0) \\ p_x(dt) & p_y(dt) & p_z(dt) \\ \vdots & \vdots & \vdots \\ p_x(T) & p_y(T) & p_z(T) \end{bmatrix} = \begin{bmatrix} I_{11}^{\text{m}}(0) & I_{11}^{\text{m}}(dt) & \dots & I_{11}^{\text{m}}(T) \\ I_{12}^{\text{m}}(0) & I_{12}^{\text{m}}(dt) & \dots & I_{12}^{\text{m}}(T) \\ \vdots & \vdots & \ddots & \vdots \\ I_{jn}^{\text{m}}(0) & I_{jn}^{\text{m}}(dt) & \dots & I_{jn}^{\text{m}}(T) \\ \vdots & \vdots & \ddots & \vdots \\ I_{Nn_j^{\text{seg}}}^{\text{m}}(0) & I_{Nn_j^{\text{seg}}}^{\text{m}}(dt) & \dots & I_{Nn_j^{\text{seg}}}^{\text{m}}(T) \end{bmatrix}^T \begin{bmatrix} r_{11}^{(x)} & r_{11}^{(y)} & r_{11}^{(z)} \\ r_{12}^{(x)} & r_{12}^{(y)} & r_{12}^{(z)} \\ \vdots & \vdots & \vdots \\ r_{jn}^{(x)} & r_{jn}^{(y)} & r_{jn}^{(z)} \\ \vdots & \vdots & \vdots \\ r_{Nn_j^{\text{seg}}}^{(x)} & r_{Nn_j^{\text{seg}}}^{(y)} & r_{Nn_j^{\text{seg}}}^{(z)} \end{bmatrix}, \quad (12)$$

275 where  $p_u(t)$  is the  $u$ -component ( $u \in \{x, y, z\}$ ) of the current dipole moment at time  $t$  (thus  $\mathbf{p}(t) \equiv p_x(t)\hat{\mathbf{x}} +$   
276  $p_y(t)\hat{\mathbf{y}} + p_z(t)\hat{\mathbf{z}}$ ),  $I_{jn}^{\text{m}}(t)$  the transmembrane currents of segment  $n$  of cell  $j$  at time  $t$  and  $r_{jn}^{(u)}$  the corresponding  
277  $u$ -coordinates of each segment’s midpoint.  $\hat{\mathbf{x}}$ ,  $\hat{\mathbf{y}}$  and  $\hat{\mathbf{z}}$  denote the cartesian unit vectors. For more compact  
278 notation we here show the transpose (denoted by the raised  $T$ ) of the matrix containing transmembrane  
279 currents. Note that the same formula may be used to also compute current dipole moments  $\mathbf{p}_j$  of individual  
280 cells  $j$  (or subsets thereof) by slicing the corresponding matrix elements.

281 *Current dipole moments from axial currents.* Alternatively, the current dipole moment can be computed  
282 from axial currents between neighboring segments (see Section 2.1.2). As an example, we consider a two-  
283 compartmental dendritic stick model, where segment *one* will act as a current sink, and segment *two* as a  
284 current source. The transmembrane current entering segment two  $I_2^m$  will be the same as the axial current  
285  $I^a$  between the two segments, which is also equal to the current leaving compartment one  $I_1^m$ , such that  
286  $I_1^m = -I_2^m = I^a$ . An axial line element vector  $\mathbf{d}$  represents the path traveled by the axial current, which  
287 corresponds to the displacement  $\mathbf{r}_1 - \mathbf{r}_2$  between the compartment midpoints. From Eq (11) it thus follows  
288 that the current dipole moment is:

$$\mathbf{p} = \sum_{n=1}^2 \mathbf{r}_n I_n^m = I^a \mathbf{d}. \quad (13)$$

289 Multiplying each axial current with the respective current path gives a set of current dipoles:

$$\mathbf{p}_m(t) = I_m^a(t) \mathbf{d}_m. \quad (14)$$

290 Calculating sets of current dipole moments from neural simulations can be useful, for example for ECoG  
291 predictions (see Section 2.3.4) or magnetic fields in proximity of the neuron (see Section 2.4).

### 292 2.3.2. EEG signal for homogeneous volume conductor

293 From electrostatic theory we have that the electric potential outside a spatial distribution of current sinks and  
294 sources can be described by a multipole expansion  $\phi(r) = C_{\text{monopole}}/R + C_{\text{dipole}}/R^2 + C_{\text{quadrupole}}/R^3 +$   
295  $C_{\text{octupole}}/R^4 + \dots$ , where  $R$  is the relative distance from the multipole to measurement location (and the  
296 coefficients  $C$  depends on the spherical angles). Due to charge conservation, current monopoles do not  
297 exist [Nunez and Srinivasan, 2006]. For sufficiently large values of  $R$  where  $C_{\text{dipole}}/R^2 \gg \sum_{q=3}^{\infty} C_{q\text{-pole}}/R^q$ ,  
298 the electric potential of a neuron can be approximated solely from its current dipole moment, as contributions  
299 from quadrupolar and higher-order terms become negligible. The electric potential from a current dipole in an  
300 ohmic, homogeneous and isotropic medium is given by [Nunez and Srinivasan, 2006]

$$\phi_{\mathbf{p}} = \frac{\mathbf{p} \cdot \mathbf{R}}{4\pi\sigma_e R^3}, \quad (15)$$

301 where  $\mathbf{p}$  is the current dipole moment as defined above,  $\sigma_e$  the conductivity of the extracellular medium,  
302  $\mathbf{R} = \mathbf{r} - \mathbf{r}'$  the displacement vector between dipole location  $\mathbf{r}'$  and measurement location  $\mathbf{r}$ , and  $R = |\mathbf{R}|$ .  
303 Predictions of extracellular potentials from current dipole moments in homogeneous media are provided by  
304 the class `InfiniteVolumeConductor`.

### 305 2.3.3. EEG signal in four-sphere head model

306 The computation of EEG signals assuming a homogeneous volume conductor model is obviously a gross  
307 approximation as it neglects the large variation in the extracellular conductivity in the head. In order to com-  
308 pute more realistic EEG signals from underlying neuronal sources, we implemented in LFPy2.0 the inhomogeneous  
309 four-sphere head model in class `FourSphereVolumeConductor`. This model is composed of  
310 four concentric shells representing brain tissue, cerebrospinal fluid (CSF), skull and scalp, where the conduc-  
311 tivity can be set individually for each shell [Srinivasan et al., 1998; Nunez and Srinivasan, 2006]. Note that  
312 corrections to the original model formulation was recently provided in Næss et al. [2017].

313 The analytical model solution takes different forms for radial and tangential dipoles. The radial dipole

314 contribution to extracellular potential can be calculated as follows [Næss et al., 2017]:

$$\phi_{\mathbf{p}}^{(1)}(r, \theta) = \frac{p}{4\pi\sigma_1 r_z^2} \sum_{l=1}^{\infty} \left[ A_l^{(1)} \left( \frac{r}{r_1} \right)^l + \left( \frac{r_z}{r} \right)^{l+1} \right] l P_l(\cos \theta) \text{ for } r_z < r < r_1, \quad (16)$$

$$\phi_{\mathbf{p}}^{(s)}(r, \theta) = \frac{p}{4\pi\sigma_1 r_z^2} \sum_{l=1}^{\infty} \left[ A_l^{(s)} \left( \frac{r}{r_s} \right)^l + B_l^{(s)} \left( \frac{r_s}{r} \right)^{l+1} \right] l P_l(\cos \theta) \text{ for } r_{s-1} < r < r_s. \quad (17)$$

315 The tangential dipole contribution to the extracellular potentials is:

$$\phi_{\mathbf{p}}^{(1)}(r, \theta, \varphi) = \frac{-p}{4\pi\sigma_1 r_z^2} \sin \varphi \sum_{l=1}^{\infty} \left[ A_l^{(1)} \left( \frac{r}{r_1} \right)^l + \left( \frac{r_z}{r} \right)^{l+1} \right] P_l^1(\cos \theta) \text{ for } r_z < r < r_1, \quad (18)$$

$$\phi_{\mathbf{p}}^{(s)}(r, \theta, \varphi) = \frac{-p}{4\pi\sigma_1 r_z^2} \sin \varphi \sum_{l=1}^{\infty} \left[ A_l^{(s)} \left( \frac{r}{r_s} \right)^l + B_l^{(s)} \left( \frac{r_s}{r} \right)^{l+1} \right] P_l^1(\cos \theta) \text{ for } r_{s-1} < r < r_s. \quad (19)$$

316 Here,  $\phi_{\mathbf{p}}^{(1)}$  is the extracellular potential measured at radial location  $r$  in the inner sphere, the brain, while  $\phi_{\mathbf{p}}^{(s)}$   
 317 gives the potential in CSF, skull and scalp with  $s \in \{2, 3, 4\}$ , respectively.

318 The current dipole moment has magnitude  $p = |\mathbf{p}|$  and radial location  $r_z$ , while  $r_s$  and  $\sigma_s$  denote the  
 319 external radius and conductivity of shell  $s$ .  $A_l^{(s)}$  and  $B_l^{(s)}$  are coefficients that depend on the shell radii and  
 320 conductivities.  $P_l(\cos \theta)$  is the  $l$ -th Legendre Polynomial where  $\theta$  is the angle between the measurement and  
 321 dipole location vectors, further  $\varphi$  is the azimuth angle and  $P_l^1$  is the associated Legendre polynomial. The  
 322 detailed derivations of the constants  $A_l^{(s)}$  and  $B_l^{(s)}$  are given in Næss et al. [2017]. Here, we use the notation  
 323  $\sigma_{ij} \equiv \sigma_i/\sigma_j$  and  $r_{ij} \equiv r_i/r_j$ :

$$A_l^{(1)} = \frac{l+1}{\sigma_{12} - Z_l} \sigma_{12} + Z_l r_{z1}^{l+1} \quad (20)$$

$$A_l^{(2)} = \frac{A_l^{(1)} + r_{z1}^{l+1}}{r_{12}^l + r_{21}^{l+1} Y_l} \quad (21) \quad B_l^{(2)} = Y_l A_l^{(2)} \quad (22)$$

$$A_l^{(3)} = \frac{A_l^{(2)} + B_l^{(2)}}{r_{23}^l + r_{32}^{l+1} V_l} \quad (23) \quad B_l^{(3)} = V_l A_l^{(3)} \quad (24)$$

$$A_l^{(4)} = \frac{l+1}{l} \frac{A_l^{(3)} + B_l^{(3)}}{\frac{l+1}{l} r_{34}^l + r_{43}^{l+1}} \quad (25) \quad B_l^{(4)} = \frac{l}{l+1} A_l^{(4)} \quad (26)$$

$$V_l = \frac{\frac{l}{l+1} \sigma_{34} - \frac{r_{34}^l - r_{43}^{l+1}}{\frac{l+1}{l} r_{34}^l + r_{43}^{l+1}}}{\sigma_{34} + \frac{r_{34}^l - r_{43}^{l+1}}{\frac{l+1}{l} r_{34}^l + r_{43}^{l+1}}} \quad (27) \quad Y_l = \frac{\frac{l}{l+1} \sigma_{23} - \frac{\frac{l}{l+1} r_{23}^l - V_l r_{32}^{l+1}}{r_{23}^l + V_l r_{32}^{l+1}}}{\sigma_{23} + \frac{\frac{l}{l+1} r_{23}^l - V_l r_{32}^{l+1}}{r_{23}^l + V_l r_{32}^{l+1}}} \quad (28)$$

$$Z_l = \frac{r_{12}^l - \frac{l+1}{l} Y_l r_{21}^{l+1}}{r_{12}^l + Y_l r_{21}^{l+1}}. \quad (29)$$

#### 325 2.3.4. ECoG signal from four-sphere head model

326 The four-sphere head model is not restricted to EEG predictions, but can also be applied for modeling  
 327 electric potentials in other layers of the inhomogeneous head model, such as ECoG signals at the interface  
 328 between the brain tissue and the CSF. In contrast to EEG electrodes, however, the ECoG electrodes are  
 329 located only micrometers away from the apical dendrites. The electrode's proximity to the neuronal source  
 330 makes the four-sphere model a less obvious candidate model, as the model is based on the current dipole  
 331 approximation, giving good predictions only when the measurement point is more than some dipole lengths  
 332 away from the source [Lindén et al., 2010]. However, in the `FourSphereVolumeConductor` class method  
 333 `calc_potential_from_multi_dipoles()`, this problem can be avoided by taking advantage of the  
 334 fact that electric potentials sum linearly in ohmic media: Instead of computing a single current dipole moment  
 335 for the whole neuron, we compute multiple current dipole moments, one for each axial current, as described  
 336 in Section 2.3.1. Since these current dipoles have small enough source separations for the current dipole  
 337 approximation to be applicable, we can compute the ECoG signal contribution from each current dipole mo-  
 338 ment separately, using the four-sphere model. The ECoG signal is finally predicted by summing up each  
 339 contribution. The corresponding LFPy2.0 example file is `/examples/example_ECoG_4sphere.py`.

340 *2.3.5. MEG signals in spherically-symmetric head models*

341 For spherically-symmetric head models the MEG signal can be computed from the current dipole mo-  
 342 ments set up by intracellular axial currents [Hämäläinen et al., 1993, p. 428]. To compute magnetic fields  $\mathbf{B}_p$   
 343 from current dipole moments we incorporated the special form of the magnetostatic Biot-Savart law (where  
 344 magnetic induction effects are neglected) [Nunez and Srinivasan, 2006, Appendix 16] given as:

$$\mathbf{B}_p = \frac{\mu_0 \mathbf{p} \times \mathbf{R}}{4\pi R^3}. \quad (30)$$

345 As above,  $\mathbf{p}$  is the dipole source,  $\mathbf{R} = \mathbf{r} - \mathbf{r}'$  the displacement between dipole location  $\mathbf{r}'$  and measurement  
 346 location  $\mathbf{r}$ , and  $R = |\mathbf{R}|$ . For a detailed derivation of this expression see Hämäläinen et al. [1993]. The  
 347 magnetic field  $\mathbf{B}$  is related to the commonly used quantity  $\mathbf{H}$  (often also termed magnetic field) through  
 348  $\mathbf{B} = \mu_0 \mathbf{H} + \mathbf{M} = \mu \mathbf{H}$  where  $\mathbf{M}$  is the magnetization and  $\mu$  the magnetic permeability of the material.  
 349 However, in biological tissues the magnetization  $\mathbf{M}$  is very small, and  $\mu$  is very close to the magnetic constant  
 350 (i.e., the magnetic permeability of vacuum)  $\mu_0$  [Hämäläinen et al., 1993]. Predictions of magnetic signals are  
 351 in LFPy2.0 incorporated in the class `MEG`, which provides the method `calculate_H` in order to compute  
 352 the magnetic field from a current dipole moment time series. Its output must be multiplied by  $\mu$  to obtain the  
 353 magnetic field  $\mathbf{B}_p$ .

354 Throughout this paper, we show for the four-sphere head model magnetic field components decomposed  
 355 into tangential and radial components at different positions on spherical surfaces. The tangential components  
 356 were computed in the direction of the angular unit vectors  $\hat{\theta} = \cos \theta \cos \varphi \hat{x} + \cos \theta \sin \varphi \hat{y} - \sin \theta \hat{z}$  and  $\hat{\varphi} =$   
 357  $-\sin \varphi \hat{x} + \cos \varphi \hat{y}$  as  $\mathbf{B} \cdot \hat{\theta}$  and  $\mathbf{B} \cdot \hat{\varphi}$ , respectively. The radial component was computed as  $\mathbf{B}_p \cdot \hat{r}$  where  $\hat{r}$   
 358 denotes the radial unit vector from the center of the sphere in the direction of the contact. Furthermore, we  
 359 also show tangential and radial components of the surface magnetic field where the underlying dipoles were  
 360 rotated by an angle  $\theta = \pi/2$  around the  $x$ -axis, denoted  $\mathbf{B}_{R_x(\pi/2)p} \cdot \hat{\theta}$ ,  $\mathbf{B}_{R_x(\pi/2)p} \cdot \hat{\varphi}$  and  $\mathbf{B}_{R_x(\pi/2)p} \cdot \hat{r}$ ,  
 361 respectively. For this purpose we used the rotation matrix

$$R_x\left(\frac{\pi}{2}\right) = \begin{bmatrix} 1 & 0 & 0 \\ 0 & 0 & -1 \\ 0 & 1 & 0 \end{bmatrix} \quad (31)$$

362 multiplied with the current dipole moment  $\mathbf{p}$  in cartesian coordinates.

363 *2.4. Magnetic signals close to neurons*

364 Most studies of magnetic fields generated by neural activity have been based on MEG recordings where  
 365 the neuronal sources are so distant from the magnetic-field sensors that the far-field dipole approximation in  
 366 Eq (30) can be applied. However, probes are also being developed for measuring magnetic fields in direct  
 367 vicinity of the neurons [Barbieri et al., 2016; Caruso et al., 2017]. To compute the magnetic fields in the vicinity  
 368 of neurons, LFPy2.0 also implements the relevant Biot-Savart law for this situation [Blagoev et al., 2007]:

$$\mathbf{B}(\mathbf{r}) = \frac{\mu_0}{4\pi} \sum_{m=1}^{m_a} I_m^a \frac{\mathbf{d}_m \times (\mathbf{r} - \mathbf{r}_m)}{|\mathbf{r} - \mathbf{r}_m|^3}. \quad (32)$$

369 This formula provides the magnetic field for  $m_a$  axial currents  $I_m^a$  where  $\mathbf{d}_m$  are axial line element vectors,  
 370 and  $\mathbf{r}_m$  the midpoint positions of each axial current. The use of this formula assumes that contributions to the  
 371 magnetic fields from extracellular volume currents are negligible [Hämäläinen et al., 1993, p. 427]. Predictions  
 372 of magnetic signals from axial currents (or equivalently sets of current dipoles) are in LFPy2.0 facilitated by the  
 373 corresponding class method `MEG.calculate_H_from_axial()`. We show (in Fig 2) the  $y$ -components  
 374 of the magnetic fields in vicinity of a model neuron computed as  $\mathbf{B} \cdot \hat{y}$  and  $\mathbf{B}_p \cdot \hat{y}$  respectively.



## 375 2.5. New Classes and network use-case implementation

376 The first release of LFPy described in [Lindén et al. \[2014\]](#) included a set of Python class definitions for in-  
377 stantiating single-cell models (`Cell`, `TemplateCell`) and corresponding instrumentation of the models with  
378 synapse point processes attached to the cell (`Synapse`), patch-clamp electrodes (`StimIntElectrode`)  
379 and extracellular recording electrodes (`RecExtElectrode`). Simulations with multiple simultaneous cell-  
380 object instances were at the time not supported. Class `TemplateCell` supported the use of template  
381 specifications, a requirement for networks in NEURON, but was primarily written to support source codes  
382 of 'network-ready' single-cell models such as the [Hay et al. \[2011\]](#) models of layer-5 pyramidal neurons avail-  
383 able from, for example, ModelDB ([senselab.med.yale.edu/modeldb](https://senselab.med.yale.edu/modeldb), [McDougal et al. \[2017\]](#)).

384 The 'one cell at a time' approach may seem limited, in particular when considering ongoing network  
385 interactions, but knowing that forward-modeling of extracellular potentials can be decoupled from the network  
386 simulation, users could always set up simulations of each individual cell, play back synapse activation times  
387 as occurring in the connected network, and sum up the single-cell contributions to the extracellular potential.  
388 Thus, the calculation of extracellular potentials can even be dealt with in an 'embarrassingly' parallel manner  
389 [[Foster, 1995](#); [Hagen et al., 2016](#)]. These simplifying steps are not possible if the extracellular potential itself  
390 affects the cellular dynamics, that is, if mutual interactions between cellular compartments belonging to the  
391 same or different cells occur through the extracellular potential, so-called ephaptic interactions [[Anastassiou](#)  
392 [et al., 2011](#); [Goldwyn and Rinzel, 2016](#); [Tveito et al., 2017](#)].

393 For the present LFPy2.0 release, we added support for simulations of recurrently connected multicompart-  
394 ment models with concurrent calculations of extracellular potentials and current dipole moments. As described  
395 above, the current dipole moment is used for predictions of distal electric potentials (for example scalp surface  
396 potentials as in EEG measurements) and magnetic fields (as in MEG measurements). For our example use  
397 case, we considered a recurrent network of four populations of multicompartment neuron models. We added  
398 a new set of generic class definitions in LFPy to represent the network, its populations and neurons, as well as  
399 classes representing different volume-conductor models and measurement modalities as summarized next.

400 *Cells.* Each individual neuron in an LFPy network exists as an instantiation of class `NetworkCell`. As this  
401 class definition uses class inheritance from the old `TemplateCell` and in turn `Cell` classes, it retains all  
402 common methods and attributes from its parent classes. The `NetworkCell` can therefore be instantiated in  
403 a similar manner as its parent class:

```
404 #!/usr/bin/env python
405 """example_NetworkCell.py"""
406 # import modules:
407 from LFPy import NetworkCell, StimIntElectrode
408 from matplotlib.pyplot import subplot, plot
409 # class NetworkCell parameters:
410 cellParameters = dict(
411     morphology='BallAndStick.hoc',
412     templatefile='BallAndStickTemplate.hoc',
413     templatename='BallAndStickTemplate',
414     templateargs=None,
415     v_init=-65.
416 )
417 # create cell:
418 cell = NetworkCell(
419     tstart=0., tstop=100.,
420     **cellParameters
421 )
422 # create stimulus device:
423 iclamp = StimIntElectrode(
424     cell=cell,
425     idx=0,
426     pptype='IClamp',
427     amp=0.5,
428     dur=80.,
429     delay=10.,
430     record_current=True
431 )
432 # run simulation:
```

```
433 cell.simulate()
434 # plot cell response:
435 subplot(2,1,1)
436 plot(cell.tvec, iclamp.i)
437 subplot(2,1,2)
438 plot(cell.tvec, cell.somav)
```

439 The morphology and template files referred to above are defined in NEURON 'hoc' language files. A 'ball and stick' style morphology file with active soma (Hodgkin & Huxley Na<sup>+</sup>, K<sup>+</sup> and leak channels) and passive dendrite sections and corresponding template file was written as:

```
442 /* -----
443 BallAndStick.hoc
444 ----- */
445 // Create sections:
446 create soma[1]
447 create apic[1]
448
449 // Add 3D information:
450 soma[0] {
451     pt3dadd(0, 0, -15, 30)
452     pt3dadd(0, 0, 15, 30)
453 }
454 apic[0] {
455     pt3dadd(0, 0, 15, 3)
456     pt3dadd(0, 0, 1015, 3)
457 }
458
459 // Connect section end points:
460 connect apic[0](0), soma[0](1)
461
462 // Set biophysical parameters:
463 forall {
464     Ra = 100.
465     cm = 1.
466     all.append()
467 }
468 soma { insert hh }
469 apic {
470     insert pas
471     g_pas = 0.0002
472     e_pas = -65.
473 }
474 /* ----- */
```

475 and

```
476 /* -----
477 BallAndStickTemplate.hoc
478 ----- */
479 begintemplate BallAndStickTemplate
480 public init, soma, apic
481 public all
482 objref all
483 proc init() {
484     all = new SectionList()
485 }
486 create soma[1], apic[1]
487 endtemplate BallAndStickTemplate
488 /* ----- */
```

489 In contrast to class `TemplateCell`, class `NetworkCell` has built-in methods to detect somatic action potentials and set-ups of synapses being activated by such threshold crossings in other cells.

491 *Network populations.* One step up in the hierarchy, class `NetworkPopulation` represents a size  $N_X$  population of `NetworkCell` objects of one particular cell type ( $X$ ) in the network. The class can be used directly as:

```

494 #!/usr/bin/env python
495 """example_NetworkPopulation.py"""
496 # import modules
497 from mpi4py.MPI import COMM_WORLD as COMM
498 from LFPy import NetworkPopulation, NetworkCell
499 # class NetworkCell parameters:
500 cellParameters = dict(
501     morphology='BallAndStick.hoc',
502     templatefile='BallAndStickTemplate.hoc',
503     templatename='BallAndStickTemplate',
504     templateargs=None,
505     delete_sections=False,
506 )
507 # class NetworkPopulation parameters:
508 populationParameters = dict(
509     Cell=NetworkCell,
510     cell_args = cellParameters,
511     pop_args = dict(
512         radius=100.,
513         loc=0.,
514         scale=20.),
515     rotation_args = dict(x=0., y=0.),
516 )
517 # create population:
518 population = NetworkPopulation(
519     first_gid=0, name='E',
520     **populationParameters
521 )
522 # print out some info:
523 for cell in population.cells:
524     print('RANK {}; pop {}; gid {}; cell {}'.format(
525         COMM.Get_rank(), population.name,
526         cell.gid, cell))

```

527 Direct instantiation of class `NetworkPopulation`, however, is of limited use as it does not provide any
528 means of simulation control by itself, and has only one built-in method to draw and set random cell-body posi-
529 tions within a chosen radius (`pop_args['radius']`) and depth from the normal distribution  $\mathcal{N}(\bar{u}, \sigma_{\bar{u}})$ . In
530 the code example above, `pop_args['loc']` refers to expected mean depth  $\bar{u}$  and `pop_args['scale']`
531 to the corresponding standard deviation  $\sigma_{\bar{u}}$ . A random cell rotation around its own vertical  $z$ -axis is applied
532 by default. The integer `cell.gid` value accessed above is a unique global identifier  $g_{id}$  of each cell in the
533 network, and is assigned in running order from the number `first_gid`. For parallel execution using MPI,
534 cells will be distributed among threads according to the round-robin rule if the condition  $g_{id} \% N_{\text{MPI}} == k$  is
535 True, where  $\%$  denotes a division modulus operation,  $N_{\text{MPI}}$  the MPI pool size and  $k \in [0, 1, \dots, N_{\text{MPI}} - 1]$  the
536 corresponding rank number.

537 **Networks.** The new network functionality is provided through class `Network`. An instantiation of the class
538 sets attributes for the default destination of file output, temporal duration  $t$  and resolution  $dt$  of the simulation,
539 a chosen initial voltage  $V_{\text{init}}^m$  and global temperature control  $T_{\text{celsius}}$  (which affects channel dynamics). Further-
540 more, the class instance provides built-in methods to create any number of  $N_X$ -sized populations  $X$ . Different
541 built-in class methods create random connectivity matrices  $C_{XY}^{(r)}$  (per rank, see *Connectivity Model* below)
542 between any presynaptic population  $X$  and postsynaptic population  $Y$ , and connect  $X$  and  $Y$  using an inter-
543 ger number of synapses per connection  $n^{\text{syn}}$  drawn from the capped normal distribution  $\mathcal{N}(\bar{n}^{\text{syn}}, \sigma_{\bar{n}}^{\text{syn}})H(n)$ 
544 where  $H(\cdot)$  denotes the Heaviside step function. Similarly, synaptic conductances  $g^{\text{syn}}$  are drawn from the
545 distribution  $\mathcal{N}(\bar{g}^{\text{syn}}, \sigma_{\bar{g}}^{\text{syn}})H(g - g_{\text{min}})$  (where  $g_{\text{min}}$  denotes minimum synaptic conductance) with connection
546 delays  $\delta^{\text{syn}}$  from  $\mathcal{N}(\bar{\delta}^{\text{syn}}, \sigma_{\bar{\delta}}^{\text{syn}})H(\delta - \delta_{\text{min}})$  (where  $\delta_{\text{min}}$  denotes the minimum delay in the network). The net-
547 work class handles the synapse model in NEURON and corresponding parameters (time constants, reversal
548 potentials, putative synapse locations etc.), and finally provides a simulation control procedure. The simulation
549 control allows for concurrent calculation of network activity and prediction of extracellular potentials as well as
550 the current dipole moment.

551 In order to set up a complete network simulation we may choose to define `NetworkCell` and
552 `NetworkPopulation` parameters as above, and define parameter dictionaries for our instances of `Network`

553 and extracellular measurement device RecExtElectrode:

```
554 #!/usr/bin/env python
555 """example_Network.py"""
556 # import modules
557 import numpy as np
558 import scipy.stats as st
559 from mpi4py import MPI
560 from LFPy import NetworkCell, Network
561 import neuron
562 # relative path for simulation output:
563 OUTPUTPATH='example_network_output'
564 # class NetworkCell parameters:
565 cellParameters = dict(**cellParameters)
566 # class NetworkPopulation parameters:
567 populationParameters = dict(**populationParameters)
568 # class Network parameters:
569 networkParameters = dict(
570     dt = 2**-4,
571     tstop = 1200.,
572     v_init = -65.,
573     celsius = 6.5,
574     OUTPUTPATH = OUTPUTPATH
575 )
576 # class RecExtElectrode parameters:
577 electrodeParameters = dict(
578     x = np.zeros(13),
579     y = np.zeros(13),
580     z = np.linspace(1000., -200., 13),
581     N = np.array([[0., 1., 0.]*13]),
582     r = 5.,
583     n = 50,
584     sigma = 0.3,
585 )
586 # method Network.simulate() parameters:
587 networkSimulationArguments = dict(
588     rec_current_dipole_moment = True,
589     rec_pop_contributions = True,
590 )
```

591 Furthermore, we define population names ( $X$ ) and corresponding sizes ( $N_X$ ), as well as one overall  
592 connection probability ( $C_{YX}$ ):

```
593 # population names, sizes and connection probability:
594 population_names = ['E', 'I']
595 population_sizes = [80, 20]
596 connectionProbability = [[0.05, 0.05]]*2
```

597 Then, we may chose to define the synapse model and corresponding parameters (here using NEURON's  
598 built-in two-exponential model Exp2Syn) for synapse conductances (weight), delays and synapses per con-  
599 nection (multapses), as well as layer-specificities of connections ( $\mathcal{L}_{YXL}$ , see [Hagen et al. \[2016\]](#) and below):

```
600 # synapse model. All corresponding parameters for weights,
601 # connection delays, multapses and layerwise positions are
602 # set up as shape (2, 2) nested lists for each possible
603 # connection on the form:
604 # [{"E:E", "E:I"},
605 # [{"I:E", "I:I"}].
606 synapseModel = neuron.h.Exp2Syn
607 # synapse parameters
608 synapseParameters = [[dict(tau1=0.2, tau2=1.8, e=0.)*2,
609                      [dict(tau1=0.1, tau2=9.0, e=-80.)*2]]
610 # synapse max. conductance (function, mean, st.dev., min.):
611 weightFunction = np.random.normal
612 weightArguments = [[dict(loc=0.002, scale=0.0002)]*2,
613                   [dict(loc=0.01, scale=0.001)]*2]
614 minweight = 0.
615 # conduction delay (function, mean, st.dev., min.):
616 delayFunction = np.random.normal
617 delayArguments = [[dict(loc=1.5, scale=0.3)]*2]*2
618 mindelay = 0.3
619 multapseFunction = np.random.normal
620 multapseArguments = [[dict(loc=2., scale=.5)]*2,
```

```
621         [dict(loc=5., scale=1.)*2]
622 # method NetworkCell.get_rand_idx_area_and_distribution_norm
623 # parameters for layerwise synapse positions:
624 synapsePositionArguments = [[dict(section=['soma', 'apic'],
625                                   fun=[st.norm]*2,
626                                   funargs=[dict(loc=500., scale=100.)*2,
627                                           funweights=[0.5, 1.])*2,
628                                   [dict(section=['soma', 'apic'],
629                                         fun=[st.norm]*2,
630                                         funargs=[dict(loc=0., scale=100.)*2,
631                                                   funweights=[1., 0.5])*2]
```

632 Note that we above relied on Python list-comprehension tricks for compactness. Having defined all parameters, one can then create the network, populations, stimulus, connections, recording devices, run the simulation and collect simulation output:

```
633
634
635 if __name__ == '__main__':
636     #####
637     # Main simulation
638     #####
639     # create directory for output:
640     if not os.path.isdir(OUTPUTPATH):
641         if RANK == 0:
642             os.mkdir(OUTPUTPATH)
643     COMM.Barrier()
644
645     # instantiate Network:
646     network = Network(**networkParameters)
647
648     # create E and I populations:
649     for name, size in zip(population_names, population_sizes):
650         network.create_population(name=name, POP_SIZE=size,
651                                 **populationParameters)
652
653     # create excitatory background synaptic activity for each cell
654     # with Poisson statistics
655     for cell in network.populations[name].cells:
656         idx = cell.get_rand_idx_area_norm(section='allsec', nidx=64)
657         for i in idx:
658             syn = Synapse(cell=cell, idx=i, syntype='Exp2Syn',
659                           weight=0.002,
660                           **dict(tau1=0.2, tau2=1.8, e=0.))
661             syn.set_spike_times_w_netstim(interval=200.)
662
663
664     # create connectivity matrices and connect populations:
665     for i, pre in enumerate(population_names):
666         for j, post in enumerate(population_names):
667             # boolean connectivity matrix between pre- and post-synaptic neurons
668             # in each population (postsynaptic on this RANK)
669             connectivity = network.get_connectivity_rand(pre=pre, post=post,
670                                                         connprob=connectionProbability[i][j])
671
672             # connect network:
673             (conncount, syncount) = network.connect(
674                 pre=pre, post=post,
675                 connectivity=connectivity,
676                 syntype=synapseModel,
677                 synparams=synapseParameters[i][j],
678                 weightfun=np.random.normal,
679                 weightargs=weightArguments[i][j],
680                 minweight=minweight,
681                 delayfun=delayFunction,
682                 delayargs=delayArguments[i][j],
683                 mindelay=mindelay,
684                 multapsefun=multapseFunction,
685                 multapseargs=multapseArguments[i][j],
686                 syn_pos_args=synapsePositionArguments[i][j],
687             )
688
689     # set up extracellular recording device:
690     electrode = RecExtElectrode(**electrodeParameters)
691
```

```
692
693 # run simulation:
694 SPIKES, OUTPUT, DIPOLEMOMENT = network.simulate(
695     electrode=electrode,
696     **networkSimulationArguments
697 )
```

698 The argument `SPIKES` returned by the final `network.simulate` method call is a dictionary with keys  
699 `gids` and `times`, where the corresponding values are lists of global neuron ID's ( $g_{ID}$ ) and numpy ar-  
700 rays with spike times of each respective unit in the network. The returned `OUTPUT` and `DIPOLEMOMENT`  
701 arguments are numpy arrays with structured datatypes (sometimes referred to as record arrays). The ar-  
702 ray `OUTPUT['imem']` is the total extracellular potential from all transmembrane currents in units of mV,  
703 the entries 'E' and 'I' contributions from the excitatory and inhibitory neuron populations, respectively.  
704 `DIPOLEMOMENT` similarly contains the current dipole moment from populations 'E' and 'I', but not the  
705 sum as the current dipole moment of different populations may, in principle, be freely positioned in different lo-  
706 cations within a volume conductor. The computed current dipole moments by themselves have no well defined  
707 positions in space and must explicitly be assigned a position by the user, unlike the individual compartment  
708 positions used when computing the extracellular potential.

709 The corresponding LFPy2.0 example files discussed throughout this section are:

- 710 • `/examples/example_network/example_NetworkCell.py`,
- 711 • `/examples/example_network/example_NetworkPopulation.py`
- 712 • `/examples/example_network/example_Network.py`.

## 713 2.6. Description of biophysically-detailed network in example use case

714 *Neuron models.* Our example network model presented in [Results](#) comprised about 5500 biophysically  
715 detailed multicompartment neurons obtained from The Neocortical Microcircuit Collaboration (NMC) Portal  
716 (<https://bbp.epfl.ch/nmc-portal>, [Ramaswamy et al. \[2015\]](#)). The NMC portal provides NEURON code for about  
717 1000 different single-cell models as well as connectivity data of a reconstruction and simulation of a rat so-  
718 matosensory cortex column [[Markram et al., 2015](#)].

719 For simplicity of this demonstration, we here use only four different single-cell models as shown in Fig 4A  
720 for the different network populations. For layers 4 and 5 we chose the most common excitatory cell type and  
721 most common inhibitory interneuron cell type, in accordance with statistics of the reconstructed microcircuit of  
722 [Markram et al. \[2015\]](#) as provided on the NMC portal. The table in panel A summarizes population names ( $X$ -  
723 presynaptic;  $Y$ - postsynaptic) which here coincide with morphology type ( $m$ ), electric type ( $e$ ), cell model #,  
724 compartment count per single-cell model ( $n_j^{seg}$ ), number of cells  $N_X$  in each population, occurrence  $F_X \equiv$   
725  $N_X / \sum_X N_X$ , the number of external synapses on each cell  $n_{ext}$ , rate expectation of external synapses  $\nu_{ext}$   
726 and the mean  $\bar{z}_X^{soma}$  and standard deviation  $\sigma_{\bar{z}_X^{soma}}$  of the normal distribution  $\mathcal{N}(\bar{z}_X^{soma}, \sigma_{\bar{z}_X^{soma}})$  from which  
727 somatic depths are drawn for each population. The cell type can be derived from the 'm' and 'e' type in the  
728 table. Using the nomenclature of [Markram et al. \[2015\]](#), L4 and L5 are abbreviations for layer 4 and 5; PC  
729 – pyramidal cell; LBC – large basket cell; TTPC1 – thick-tufted pyramidal cell with a late bifurcating apical  
730 tuft; MC – Martinotti cell; cAD – continuous adapting; dNAC – delayed non-accommodating; bAC – burst  
731 accommodating. Thus, L4\_PC\_cAD corresponds to a layer 4 pyramidal cell with a continuously adapting  
732 firing pattern as a response to depolarizing step current and so forth. As multiple variations of the same  
733 cell types are provided on the NMC portal, the cell model # can be used to identify the particular single-cell  
734 model and corresponding file sets used in the network described here. These single-cell model files can be  
735 downloaded one after another from the portal as for example L5\_TTPC1\_cADpyr232\_1.zip, or all together  
736 in a single archive. For simplicity we ignore heterogeneity in e-types for each m-type, thus the population  
737 counts  $N_X$  correspond to the count per m-type in the reconstructed microcircuit. Note for the present network  
738 description that  $\{X, Y, m\} \in \{L4\_PC, L4\_LBC, L5\_TTPC1, L5\_MC\}$ .

739 *Population geometry.* The centers of somatic compartments for all cells  $i \in X$  were distributed with even  
 740 probability within a circular radius of  $210 \mu\text{m}$  corresponding to the radius of the reconstructed somatosen-  
 741 sory column in Markram et al. [2015]. The corresponding depths were drawn from the normal distribution  
 742  $\mathcal{N}(\bar{z}_X^{\text{soma}}, \sigma_{\bar{z}, X}^{\text{soma}})$  using population-specific mean and standard deviations given in Fig 4A. Neuron positions  
 743 resulting in any neuron compartments protruding above the hypothetical cortical surface at  $z = 0$  or below  
 744 layer 6 at  $z = -2082 \mu\text{m}$  were redrawn from the depth distribution. All cells were rotated around their local  
 745 vertical  $z$ -axis by a random angle  $\theta \in [0, 2\pi)$ .

746 *Synapse models.* For synapses made by cells in a presynaptic population  $X$  onto a postsynaptic population  
 747  $Y$  we used synapse model files provided with the single-cell model files from the NMC portal. There are  
 748 two base models with connection-specific parameterization which were obtained from the portal. Excitatory  
 749 synapses are modeled as probabilistic AMPA and NMDA receptors, while inhibitory synapses are modeled  
 750 as probabilistic GABA<sub>A</sub> receptors. Both synapse types were modeled with presynaptic short-term plasticity.  
 751 The synapse parameterization procedure and validation is described in detail in Markram et al. [2015], with  
 752 code implementations based on Fuhrmann et al. [2002]. The synapse parameters are summarized in Table 1,  
 753 detailing the synapse model names, average synaptic conductances  $\bar{g}^{\text{syn}}$  and corresponding standard devia-  
 754 tions  $\sigma_{\bar{g}}^{\text{syn}}$ , release probabilities  $P_u$ , relaxation time constants from depression  $\tau_{\text{Dep}}$ , relaxation time constants  
 755 from facilitation  $\tau_{\text{Fac}}$ , ratios of NMDA vs. AMPA (excitatory connections only), rise and decay time constants  
 756  $\tau_U^r$  and  $\tau_U^d$  of the two-exponential conductances of each current type  $U \in \{\text{AMPA}, \text{NMDA}, \text{GABAA}\}$ , and  
 757 reversal potentials  $e^{\text{syn}}$ . Random conductances for each individual synapse were drawn from the capped nor-  
 758 mal distribution  $\mathcal{N}(\bar{g}^{\text{syn}}, \sigma_{\bar{g}}^{\text{syn}})H(g - g_{\text{min}})$ . For our network we set the minimum synaptic conductance to be  
 759  $g_{\text{min}} = 0 \text{ nS}$ .

760 *Extrinsic input.* Synapses from external inputs to the neurons in our network were modeled similarly to ex-  
 761 citatory synapses of intrinsic network connections. For inputs to a population  $Y$  in layer  $L$  we chose to  
 762 duplicate the synapse parameters of connections made by the presynaptic excitatory population within the  
 763 same layer (as we were unable to assess what parameters were used for extrinsic connections in Markram  
 764 et al. [2015]). Our synapse parameters are given in Table 2. For each cell in the network we created  $n_{\text{ext}}$   
 765 synapses set randomly onto dendritic and apical compartments with compartment specificity of connections  
 766  $S_{jn} / \sum_{n \in \{\text{dend}, \text{apic}\}} S_{jn}$ , where  $S_{jn}$  denotes surface area of compartment  $n$  of cell  $j$ . The random activation  
 767 times of each synapse were set using Poisson processes with rate expectation  $\nu_{\text{ext}}$  for the duration of the  
 768 simulation. The values for  $n_{\text{ext}}$  and  $\nu_{\text{ext}}$  are given in Fig 4A, and were set by hand in order to maintain spiking  
 769 activity in all populations.

770 *Connectivity model.* Random connections in our network were set using the Python-implementation of the  
 771 ‘connection-set algebra’ of Djurfeldt [2012]; Djurfeldt et al. [2014] (<https://github.com/INCF/csa>). Using this  
 772 formalism, we constructed boolean connectivity matrices  $\mathbf{C}_{YX}^{(r)}$  for postsynaptic cells  $j^{(r)} \subset Y$  distributed  
 773 across each separate parallel MPI rank (denoted by the superset ‘ $(r)$ ’ for rank number) and presynaptic cells  
 774  $i \in X$ . Each instance of  $\mathbf{C}_{YX}^{(r)}$  had shape  $(N_X \times N_{j^{(r)} \subset Y})$ , with entries equal to True denoting connections  
 775 from cell  $i$  to  $j^{(r)}$ , as expressed mathematically by

$$\mathbf{C}_{YX}^{(r)}(C_{YX})(i, j^{(r)}) = \begin{cases} \text{True with probability } C_{YX} , \\ \text{False otherwise .} \end{cases} \quad (33)$$

776 For  $X = Y$  and  $i = j^{(r)}$ , entries in  $\mathbf{C}_{YX}^{(r)}$  were set to False (no autapses). We used fixed connection probabil-  
 777 ities  $C_{YX}$  as obtained from the NMC portal between our chosen m-types.

778 *Multapses.* As multiple synapses per connection appear to be a prominent feature in cortical networks (see  
 779 Reimann et al. [2015]; Markram et al. [2015] and references therein), we drew for every connection between  
 780 presynaptic cell  $i$  and postsynaptic cell  $j$  a random number of synapses  $n^{\text{syn}}$  rounded to an integer from the

781 capped normal distribution  $\mathcal{N}(\bar{n}^{\text{syn}}, \sigma_{\bar{n}}^{\text{syn}})H(n)$ . Conduction delays from action-potential detection (thresh-  
 782 old  $\theta_{\text{AP}} = -10$  mV) in cell  $i$  for each corresponding synapse onto cell  $j$  were drawn from the distribution  
 783  $\mathcal{N}(\bar{\delta}^{\text{syn}}, \sigma_{\bar{\delta}}^{\text{syn}})H(\delta - \delta_{\text{min}})$ . For our network we set the minimum delay  $\delta_{\text{min}} = 0.3$  ms for all connections.

*Layer-specificity of connections.* In order to position each individual synapse of a connection on a cell  $j \in Y$ , in a simplified manner that depended on the degree of overlap between presynaptic axons and postsynaptic dendrites ('Peter's rule'), we calculated for each postsynaptic population  $Y$  layer-specificities of connections  $\mathcal{L}_{YXL}$  in layer  $L$  for synapses made by presynaptic populations  $X$  [Hagen et al., 2016], by first computing the sums  $\Delta s_{iXL} = \sum_{n \in \text{axon}} \Delta s_{inXL}$ , that is, the total axon length of a presynaptic cell type per layer  $L$  and sums  $\Delta s_{jYL} = \sum_{n \in \{\text{soma}, \text{dend}\}} \Delta s_{jnYL}$  of total dendrite and soma length for each postsynaptic cell type across each layer. Then we defined the layer-specificity of connections as

$$\mathcal{L}_{YXL} = \sqrt{\Delta s_{iXL} \Delta s_{jYL}} / \sum_L \sqrt{\Delta s_{iXL} \Delta s_{jYL}}.$$

784 The sums  $\sum_L \mathcal{L}_{YXL} = 1$  for all  $X$  and  $Y$ . Synapse sites of connections onto cell  $j$  were then set randomly  
 785 with a compartment specificity of connections  $S_{jn} \sum_L \text{Pr}_{\mathcal{N}(\mathcal{L}_{YXL}, \Delta L/2)}(z_{nj}) / \sum_n S_{jn}$ , where  $S_{jn}$  is the sur-  
 786 face area of compartment  $n$  of the cell  $j$  centered at depth  $z_{nj}$  and  $\text{Pr}_{\mathcal{N}(\dots)}$  the probability density function of  
 787 the distribution  $\mathcal{N}(\mathcal{L}_{YXL}, \Delta L/2)$ .  $\Delta L$  denotes the thickness of layer  $L$ .

788 All connectivity parameter values ( $C_{YX}$ ,  $\bar{n}^{\text{syn}}$ ,  $\sigma_{\bar{n}}^{\text{syn}}$ ,  $\bar{\delta}^{\text{syn}}$ ,  $\sigma_{\bar{\delta}}^{\text{syn}}$ ,  $\mathcal{L}_{YXL}$ ) are summarized in Table 3. Visual  
 789 representations of  $C_{YX}$ ,  $\bar{n}^{\text{syn}}$  and  $\mathcal{L}_{YXL}$  are shown in Fig 4B, C and D. Panel E shows 20 cells in each  
 790 population  $X$  with corresponding distribution of  $N_X$  somas across depth ( $\Delta z = 50 \mu\text{m}$ ) in panel F. Panel G  
 791 shows the resulting distribution of synapses across depth for all combinations of  $Y$  and  $X$  ( $\Delta z = 50 \mu\text{m}$ ).

792 *Computation of extracellular potentials inside cortical column.* For our multicompartment neuron network  
 793 we chose to compute the extracellular potential vertically through the center of the column, with the most  
 794 superficial contact at the top of layer 1 ( $z = 0$ ) to a depth of  $z = -1500 \mu\text{m}$  within layer 6. The inter-contact  
 795 distance was  $\Delta z = 100 \mu\text{m}$ , and contacts were assumed to be circular with radius  $r_{\text{contact}} = 5 \mu\text{m}$  and surface  
 796 normal vectors aligned with the horizontal  $y$ -axis. For the electrode surface averaging we used  $m = 50$  (cf.  
 797 Eq (8) and Lindén et al. [2014]). For the calculation of extracellular potential inside the cortical column we  
 798 assumed a homogeneous, isotropic, linear and ohmic extracellular conductivity  $\sigma_e = 0.3$  S/m.

799 *Computation of ECoG signal from Method-of-Images.* The extracellular potential on top of cortex (ECoG)  
 800 was computed by means of the Method-of-Images (MOI, see Section 2.2.2). In the example, the conductivity  
 801 below the contact was set as  $\sigma_G = \sigma_T = 0.3$  S/m, corresponding to the gray-matter value used above, while  
 802 the conductivity on top of cortex was to set to be fully insulating, i.e.,  $\sigma_T = 0$  S/m. This could correspond to the  
 803 situation where a grid of ECoG contacts are embedded in an insulating material (see, for example, Castagnola  
 804 et al. [2014]). We further considered a single circular ECoG disk electrode with contact radius  $r = 250 \mu\text{m}$   
 805 with its surface normal vector perpendicular to the brain surface. The disk electrode was centered at the  
 806 vertical population axis and positioned at the upper boundary of layer 1. For the disk-electrode approximation  
 807 (cf. Eq (8)) we set  $m = 500$ . (Note that the present MOI implementation requires all transmembrane currents  
 808 to be represented as point sources confined within the boundaries of the middle (cortical) layer.

809 *Computation of EEG and MEG signals.* The most direct approach for computing EEG and MEG signals  
 810 would be to (i) compute the per-neuron current dipole moment, (ii) compute the contribution to the signals  
 811 from each neuron, and (iii) sum these signals to get the total EEG and MEG signals from the entire network.  
 812 To reduce the computational demands, we instead compute the per-population current dipole moment  $\mathbf{p}_X(t)$   
 813 using Eq (12). The total current dipole moment is then obtained by summing over all populations, i.e.,  $\mathbf{p} =$   
 814  $\sum_X \mathbf{p}_X$ .

815 From  $\mathbf{p}_X$  we computed the EEG (surface electric potentials on the scalp layer) of the four-sphere head  
 816 model as described above, and similarly magnetic fields  $\mathbf{B}_p$ . For the four-sphere head model we assumed



817 conductivities  $\sigma_s \in \{0.3, 1.5, 0.015, 0.3\}$  S/m and radii  $r_s \in \{79, 80, 85, 90\}$  mm for brain, cerebrospinal fluid  
818 (CSF), skull and scalp, respectively [Nunez and Srinivasan, 2006; Næss et al., 2017]. We positioned each  
819 population current dipole  $\mathbf{p}_X$  below the brain-CSF boundary on the vertical  $z$ -axis (thus  $x = y = 0$ ) at  
820  $z = r_1 + \bar{z}_X^{\text{soma}}$ , where  $\bar{z}_X^{\text{soma}}$  was the average soma depth within each population. Surface potentials, i.e.,  
821 EEG potentials, and magnetic fields were computed for polar angles  $\theta \in [-\pi/4, \pi/4]$  with angular resolution  
822  $\Delta\theta = \pi/16$  as illustrated in Fig 5E (azimuth angles  $\varphi = 0$ ), resulting in a contact separation along the arc  
823 of  $r_4\pi/16 \approx 18$  mm. Different magnetoencephalogram (MEG) equipment may be sensitive to different  
824 components of the magnetic field [Hämäläinen et al., 1993]. We show different scalar components of the  
825 magnetic field computed on the surface of the four-sphere head model as described above (in Section 2.3.5).

826 *Simulation details.* Simulations were run for a total duration of  $T = 1500$  ms with a simulation step size  
827  $dt = 0.0625$  ms (16 kHz sampling frequency). The first 500 ms were discarded as startup transient. All  
828 neurons were initialized at a membrane voltage  $V_{\text{init}}^m = -77$  mV and temperature  $T_{\text{celsius}} = 34^\circ\text{C}$  (affecting  
829 membrane-channel dynamics).

## 830 2.7. Technical details

831 All source codes and development history of past and present versions of LFPy are publicly available  
832 on GitHub (see <https://github.com/LFPy/LFPy>), using 'git' (<https://git-scm.com>) for code provenance tracking.  
833 LFPy is released with an open-source software licence (GPL), which alongside GitHub functionality for listing  
834 issues, integration with automated testing, easy forking, local development and merges of upstream changes,  
835 facilitates continued, community-based LFPy development.

836 LFPy2.0 requires Python (continuously tested w. v2.7, v3.4-3.6), an MPI (message-parsing interface)  
837 implementation such as OpenMPI, NEURON v7.4 or newer compiled with MPI and bindings for Python,  
838 Cython, and the Python packages mpi4py, numpy, scipy, h5py, csa (<https://github.com/INCF/csa>) and NeuroTools  
839 (<http://neuralensemble.org/NeuroTools>). In order to run all example files also matplotlib and Jupyter  
840 (<http://jupyter.org>) have to be installed, but prebuilt Python distributions such as Anaconda  
841 (<https://www.continuum.io>) should provide these common Python packages, or provide easy means of in-  
842 stalling LFPy dependencies (issuing, for example, "conda install mpi4py" on the command line). Detailed in-  
843 structions for installing dependencies for common operating systems (MacOS, Linux, Windows) are provided  
844 in the online LFPy documentation (<http://lfp.readthedocs.io>).

845 The latest stable LFPy release on the Python Package Index (<https://pypi.python.org>) can be installed by  
846 issuing:

```
847 $ pip install LFPy --user
```

848 which may prompt the install of also other missing dependencies. The command

```
849 $ pip install --upgrade --no-deps LFPy
```

850 may be used to upgrade an already existing installation of LFPy (without updating other dependencies). In  
851 order to obtain all LFPy source codes and corresponding example files, we recommend users to checkout the  
852 LFPy source code on GitHub, after installing the git version control software:

```
853 $ cd <path to repository folder>  
854 $ git clone https://github.com/LFPy/LFPy.git  
855 $ cd LFPy  
856 $ pip install -r requirements.txt  
857 $ python setup.py develop --user
```

858 More detail is provided on <http://lfp.readthedocs.io>.

859 *Reproducibility.* The simulated results and analysis presented here were made possible using Python 2.7.11  
860 with the Intel(R) MPI Library v5.1.3, NEURON v7.5 (1472:078b74551227), Cython v0.23.4, LFPy  
861 ([github.com/LFPy/LFPy](https://github.com/LFPy/LFPy), SHA:0d1509), mpi4py v2.0.0, numpy v1.10.4, scipy v0.17.0, h5py v2.6.0, parameters  
862 ([github.com/NeuralEnsemble/parameters](https://github.com/NeuralEnsemble/parameters), SHA:v0aaeb), csa ([github.com/INCF/csa](https://github.com/INCF/csa), SHA:452a35) and mat-  
863 plotlib v2.1.0 running in parallel using 120-4800 cores on the JURECA cluster in Jülich, Germany, composed

Table 1: Summary of intrinsic synapse parameters.

|                                      |                                       | postsynaptic population (Y)           |              |              |              |              |
|--------------------------------------|---------------------------------------|---------------------------------------|--------------|--------------|--------------|--------------|
|                                      |                                       | parameter                             | L4_PC        | L4_LBC       | L5_TTPC1     | L5_MC        |
| presynaptic population (X)           | L4_PC                                 | syn. model                            | ProbAMPANMDA | ProbAMPANMDA | ProbAMPANMDA | ProbAMPANMDA |
|                                      |                                       | $\bar{g}^{\text{syn}}$ (nS)           | 0.3          | 0.3          | 0.3          | 0.3          |
|                                      |                                       | $\sigma_{\bar{g}}^{\text{syn}}$ (nS)  | 0.11         | 0.11         | 0.11         | 0.11         |
|                                      |                                       | $P_u$                                 | 0.859        | 0.398        | 0.5          | 0.093        |
|                                      |                                       | $\tau_{\text{Dep}}$ (ms)              | 670          | 560          | 670          | 140          |
|                                      |                                       | $\tau_{\text{Fac}}$ (ms)              | 17           | 130          | 17           | 660          |
|                                      |                                       | NMDA ratio                            | 0.4          | 0.4          | 0.4          | 0.4          |
|                                      |                                       | $\tau_{\text{AMPA}}^{\text{r}}$ (ms)  | 0.2          | 0.2          | 0.2          | 0.2          |
|                                      |                                       | $\tau_{\text{AMPA}}^{\text{d}}$ (ms)  | 1.737        | 1.74         | 1.742        | 1.742        |
|                                      |                                       | $\tau_{\text{NMDA}}^{\text{r}}$ (ms)  | 0.29         | 0.29         | 0.29         | 0.29         |
|                                      | $\tau_{\text{NMDA}}^{\text{d}}$ (ms)  | 43                                    | 43           | 43           | 43           |              |
|                                      | $e^{\text{syn}}$ (mV)                 | 0                                     | 0            | 0            | 0            |              |
|                                      | L4_LBC                                | syn. model                            | ProbGABAAB   | ProbGABAAB   | ProbGABAAB   | ProbGABAAB   |
|                                      |                                       | $\bar{g}^{\text{syn}}$ (nS)           | 0.89         | 0.33         | 0.98         | 0.33         |
|                                      |                                       | $\sigma_{\bar{g}}^{\text{syn}}$ (nS)  | 1.3          | 0.15         | 1.3          | 0.16         |
|                                      |                                       | $P_u$                                 | 0.213        | 0.254        | 0.226        | 0.253        |
|                                      |                                       | $\tau_{\text{Dep}}$ (ms)              | 730          | 700          | 750          | 710          |
|                                      |                                       | $\tau_{\text{Fac}}$ (ms)              | 21           | 21           | 21           | 21           |
|                                      |                                       | $\tau_{\text{GABAA}}^{\text{r}}$ (ms) | 0.2          | 0.2          | 0.2          | 0.2          |
|                                      |                                       | $\tau_{\text{GABAA}}^{\text{d}}$ (ms) | 7.604        | 8.373        | 7.364        | 8.349        |
| $e^{\text{syn}}$ (mV)                |                                       | -80                                   | -80          | -80          | -80          |              |
| L5_TTPC1                             |                                       | syn. model                            | ProbAMPANMDA | ProbAMPANMDA | ProbAMPANMDA | ProbAMPANMDA |
|                                      | $\bar{g}^{\text{syn}}$ (nS)           | 0.29                                  | 0.3          | 0.31         | 0.3          |              |
|                                      | $\sigma_{\bar{g}}^{\text{syn}}$ (nS)  | 0.11                                  | 0.11         | 0.11         | 0.11         |              |
|                                      | $P_u$                                 | 0.5                                   | 0.369        | 0.5          | 0.092        |              |
|                                      | $\tau_{\text{Dep}}$ (ms)              | 670                                   | 550          | 670          | 150          |              |
|                                      | $\tau_{\text{Fac}}$ (ms)              | 17                                    | 140          | 17           | 690          |              |
|                                      | NMDA ratio                            | 0.4                                   | 0.4          | 0.4          | 0.4          |              |
|                                      | $\tau_{\text{AMPA}}^{\text{r}}$ (ms)  | 0.2                                   | 0.2          | 0.2          | 0.2          |              |
|                                      | $\tau_{\text{AMPA}}^{\text{d}}$ (ms)  | 1.743                                 | 1.743        | 1.744        | 1.741        |              |
|                                      | $\tau_{\text{NMDA}}^{\text{r}}$ (ms)  | 0.29                                  | 0.29         | 0.29         | 0.29         |              |
| $\tau_{\text{NMDA}}^{\text{d}}$ (ms) | 43                                    | 43                                    | 43           | 43           |              |              |
| $e^{\text{syn}}$ (mV)                | 0                                     | 0                                     | 0            | 0            |              |              |
| L5_MC                                | syn. model                            | ProbGABAAB                            | ProbGABAAB   | ProbGABAAB   | ProbGABAAB   |              |
|                                      | $\bar{g}^{\text{syn}}$ (nS)           | 0.66                                  | 0.33         | 0.66         | 0.33         |              |
|                                      | $\sigma_{\bar{g}}^{\text{syn}}$ (nS)  | 0.15                                  | 0.15         | 0.15         | 0.15         |              |
|                                      | $P_u$                                 | 0.3                                   | 0.25         | 0.299        | 0.252        |              |
|                                      | $\tau_{\text{Dep}}$ (ms)              | 1200                                  | 700          | 1200         | 710          |              |
|                                      | $\tau_{\text{Fac}}$ (ms)              | 2.1                                   | 21           | 2.2          | 21           |              |
|                                      | $\tau_{\text{GABAA}}^{\text{r}}$ (ms) | 0.2                                   | 0.2          | 0.2          | 0.2          |              |
|                                      | $\tau_{\text{GABAA}}^{\text{d}}$ (ms) | 8.291                                 | 8.295        | 8.271        | 8.339        |              |
|                                      | $e^{\text{syn}}$ (mV)                 | -80                                   | -80          | -80          | -80          |              |

Table 2: Synapse parameters for extrinsic input.

|                          |     | postsynaptic population ( $Y$ )      |              |              |              |              |
|--------------------------|-----|--------------------------------------|--------------|--------------|--------------|--------------|
|                          |     | parameter                            | L4_PC        | L4_LBC       | L5_TTPC1     | L5_MC        |
| presynaptic pop. ( $X$ ) | ext | syn. model                           | ProbAMPANMDA | ProbAMPANMDA | ProbAMPANMDA | ProbAMPANMDA |
|                          |     | $\bar{g}^{\text{syn}}$ (nS)          | 0.3          | 0.33         | 0.31         | 0.33         |
|                          |     | $\sigma_{\bar{g}}^{\text{syn}}$ (nS) | 0.11         | 0.15         | 0.11         | 0.15         |
|                          |     | $P_u$                                | 0.859        | 0.254        | 0.5          | 0.252        |
|                          |     | $\tau_{\text{Dep}}$ (ms)             | 670          | 700          | 670          | 710          |
|                          |     | $\tau_{\text{Fac}}$ (ms)             | 17           | 21           | 17           | 21           |
|                          |     | NMDA ratio                           | 0.4          | 0.4          | 0.4          | 0.4          |
|                          |     | $\tau_{\text{AMPA}}^{\text{r}}$ (ms) | 0.2          | 0.2          | 0.2          | 0.2          |
|                          |     | $\tau_{\text{AMPA}}^{\text{d}}$ (ms) | 8.291        | 8.295        | 8.271        | 8.339        |
|                          |     | $\tau_{\text{NMDA}}^{\text{r}}$ (ms) | 0.29         | 0.29         | 0.29         | 0.29         |
|                          |     | $\tau_{\text{NMDA}}^{\text{d}}$ (ms) | 43           | 43           | 43           | 43           |
|                          |     | $e^{\text{syn}}$ (mV)                | 0            | 0            | 0            | 0            |

864 of two 2.5 GHz Intel Xeon E5-2680 v3 Haswell CPUs per node (2 x 12 cores), running the CentOS 7 Linux  
 865 operating system. Each node had at least 128 GB of 2133 MHz DDR4 memory. All software packages were  
 866 compiled using the GNU Compiler Collection (GCC) v4.9.3. All source codes for this study will be provided as  
 867 LFPy example files on GitHub.

Table 3: Summary of connectivity parameters.

|                            |                                         | postsynaptic population (Y)             |        |        |          |       |
|----------------------------|-----------------------------------------|-----------------------------------------|--------|--------|----------|-------|
|                            |                                         | parameter                               | L4_PC  | L4_LBC | L5_TTPC1 | L5_MC |
| presynaptic population (X) | L4_PC                                   | $C_{YX}$                                | 0.076  | 0.042  | 0.11     | 0.034 |
|                            |                                         | $\bar{n}_{\text{syn}}$                  | 3.3    | 7.9    | 4.3      | 7.6   |
|                            |                                         | $\sigma_{\bar{n},\text{syn}}$           | 1.4    | 3.0    | 1.7      | 2.7   |
|                            |                                         | $\bar{\delta}_{\text{syn}}$ (ms)        | 1.35   | 1.17   | 1.433    | 1.521 |
|                            |                                         | $\sigma_{\bar{\delta},\text{syn}}$ (ms) | 0.867  | 0.763  | 0.817    | 0.978 |
|                            |                                         | $\mathcal{L}_{YXL1}$                    | 0.0    | 0.0    | 0.0      | 0.0   |
|                            |                                         | $\mathcal{L}_{YXL2}$                    | 0.058  | 0.0    | 0.069    | 0.0   |
|                            |                                         | $\mathcal{L}_{YXL3}$                    | 0.152  | 0.0    | 0.106    | 0.0   |
|                            |                                         | $\mathcal{L}_{YXL4}$                    | 0.336  | 0.53   | 0.105    | 0.0   |
|                            |                                         | $\mathcal{L}_{YXL5}$                    | 0.454  | 0.47   | 0.719    | 0.73  |
|                            | $\mathcal{L}_{YXL6}$                    | 0.0                                     | 0.0    | 0.0    | 0.27     |       |
|                            | L4_LBC                                  | $C_{YX}$                                | 0.063  | 0.062  | 0.056    | 0.027 |
|                            |                                         | $\bar{n}_{\text{syn}}$                  | 16.0   | 14.0   | 17.0     | 10.0  |
|                            |                                         | $\sigma_{\bar{n},\text{syn}}$           | 6.2    | 6.0    | 7.2      | 3.5   |
|                            |                                         | $\bar{\delta}_{\text{syn}}$ (ms)        | 1.006  | 1.076  | 1.064    | 1.677 |
|                            |                                         | $\sigma_{\bar{\delta},\text{syn}}$ (ms) | 0.367  | 0.395  | 0.399    | 0.494 |
|                            |                                         | $\mathcal{L}_{YXL1}$                    | 0.0    | 0.0    | 0.0      | 0.0   |
|                            |                                         | $\mathcal{L}_{YXL2}$                    | 0.0    | 0.0    | 0.0      | 0.0   |
|                            |                                         | $\mathcal{L}_{YXL3}$                    | 0.1    | 0.0    | 0.109    | 0.0   |
|                            |                                         | $\mathcal{L}_{YXL4}$                    | 0.672  | 0.818  | 0.328    | 0.0   |
| $\mathcal{L}_{YXL5}$       |                                         | 0.228                                   | 0.182  | 0.563  | 1.0      |       |
| $\mathcal{L}_{YXL6}$       | 0.0                                     | 0.0                                     | 0.0    | 0.0    |          |       |
| L5_TTPC1                   | $C_{YX}$                                | 0.011                                   | 0.0069 | 0.063  | 0.045    |       |
|                            | $\bar{n}_{\text{syn}}$                  | 2.5                                     | 6.1    | 6.2    | 9.2      |       |
|                            | $\sigma_{\bar{n},\text{syn}}$           | 0.89                                    | 2.1    | 2.6    | 3.1      |       |
|                            | $\bar{\delta}_{\text{syn}}$ (ms)        | 2.374                                   | 2.227  | 1.445  | 1.372    |       |
|                            | $\sigma_{\bar{\delta},\text{syn}}$ (ms) | 0.811                                   | 0.903  | 0.653  | 0.577    |       |
|                            | $\mathcal{L}_{YXL1}$                    | 0.0                                     | 0.0    | 0.0    | 0.0      |       |
|                            | $\mathcal{L}_{YXL2}$                    | 0.02                                    | 0.0    | 0.02   | 0.0      |       |
|                            | $\mathcal{L}_{YXL3}$                    | 0.129                                   | 0.0    | 0.078  | 0.0      |       |
|                            | $\mathcal{L}_{YXL4}$                    | 0.244                                   | 0.379  | 0.066  | 0.0      |       |
|                            | $\mathcal{L}_{YXL5}$                    | 0.608                                   | 0.621  | 0.836  | 0.739    |       |
| $\mathcal{L}_{YXL6}$       | 0.0                                     | 0.0                                     | 0.0    | 0.261  |          |       |
| L5_MC                      | $C_{YX}$                                | 0.04                                    | 0.035  | 0.083  | 0.038    |       |
|                            | $\bar{n}_{\text{syn}}$                  | 12.0                                    | 12.0   | 14.0   | 12.0     |       |
|                            | $\sigma_{\bar{n},\text{syn}}$           | 3.9                                     | 3.7    | 5.6    | 3.4      |       |
|                            | $\bar{\delta}_{\text{syn}}$ (ms)        | 1.91                                    | 1.732  | 2.252  | 1.341    |       |
|                            | $\sigma_{\bar{\delta},\text{syn}}$ (ms) | 0.994                                   | 0.663  | 1.549  | 0.787    |       |
|                            | $\mathcal{L}_{YXL1}$                    | 0.111                                   | 0.0    | 0.136  | 0.0      |       |
|                            | $\mathcal{L}_{YXL2}$                    | 0.13                                    | 0.0    | 0.187  | 0.0      |       |
|                            | $\mathcal{L}_{YXL3}$                    | 0.249                                   | 0.0    | 0.209  | 0.0      |       |
|                            | $\mathcal{L}_{YXL4}$                    | 0.329                                   | 0.735  | 0.124  | 0.0      |       |
|                            | $\mathcal{L}_{YXL5}$                    | 0.18                                    | 0.265  | 0.344  | 0.926    |       |
| $\mathcal{L}_{YXL6}$       | 0.0                                     | 0.0                                     | 0.0    | 0.074  |          |       |

### 868 3. Results

#### 869 3.1. Single-neuron activity and extracellular measurements

870 The first version of LFPy [Lindén et al., 2014] assumed the active model neurons to be embedded in  
871 an infinite homogeneous volume conductor and was most suited to compute extracellular potentials (spikes,  
872 LFPs) inside the brain. One new feature of LFPy2.0 compared to the first version of LFPy is that electrical  
873 potentials outside cortex (ECoG, EEG), as well as magnetic fields both inside and outside cortex (MEG),  
874 can be computed. These new measures are illustrated in Fig 2 for a single synaptically activated pyramidal  
875 neuron.

876 Fig 2A presents a basic LFPy simulation example where a passive neuron model with simplified morphol-  
877 ogy receives a single synaptic input current (inset I). We computed the extracellular potential in the  $xz$ -plane  
878 (color image plot), using the assumption of line sources for each dendritic compartment, a spherical current  
879 source representing the soma, and homogeneous conductivity (Eq (7)). The postsynaptic response is re-  
880 flected as a somatic depolarization (inset II) and as a deflection in the extracellular potential in the location  
881  $\mathbf{r}$  (blue dot, inset III). The corresponding current dipole moment  $\mathbf{p}(\mathbf{r}, t)$  was computed using Eq (12) and is  
882 illustrated by the black arrow. The  $x$ - and  $z$ -components of the current dipole moment are illustrated in inset  
883 IV, and we note the much larger dipole moment component in the vertical  $z$ -direction compared to the lateral  
884  $x$ -direction. We do not show the  $y$ -component of the current dipole moment as all segments in this simplified  
885 neuronal morphology are located in the  $xz$ -plane (hence  $\mathbf{p} \cdot \hat{\mathbf{y}} = 0$ ).

886 To illustrate the fact that a current dipole potential (Eq (15)) gives a good approximation to the extracellular  
887 potential  $\phi$  far away from the neuron, we compare with results from using the more comprehensive line-source  
888 method (Eq (6)) in panel B: The line-source potential  $\phi$  is shown inside the dashed circle of radius  $r > 500 \mu\text{m}$ ,  
889 while the dipole potential  $\phi_{\mathbf{p}}$  is shown outside the circle. The inset shows the dipole potential corresponding  
890 to the colored dots located at a distance of  $750 \mu\text{m}$ .

891 In panel C we similarly compute the magnetic field for radii  $r > 500 \mu\text{m}$  using the current dipole mo-  
892 ment (Eq (30)), and axial currents inside (Eq (32)). The axial currents were computed from per-compartment  
893 membrane potentials as described in Section 2.1.2. For both color image plot and the inset, we show the  
894 dominating magnetic field component, i.e., the  $y$ -component. As for the electrical potential in panel B, we see  
895 that the predicted magnetic fields match well at the  $r = 500 \mu\text{m}$  interface.

896 Panel D illustrates the layout of scalp-layer measurement sites on the four-sphere head model described  
897 in Section 2.3.3. The numbered points along the outer scalp layer represents measurement locations for  
898 EEG and MEG signals. The single current dipole moment is positioned beneath the CSF-brain boundary on  
899 the vertical  $z$ -axis (see caption for details). Panel E shows the corresponding scalp surface potentials which  
900 is dominated by the  $z$ -component of the current dipole moment ( $\mathbf{p} \cdot \hat{\mathbf{z}}$ , panel A inset IV). Panel F shows  
901 the corresponding dominant tangential magnetic field component ( $\mathbf{B}_{\mathbf{p}} \cdot \hat{\boldsymbol{\varphi}}$ ) computed from the current dipole  
902 moment using Eq (30). At the center location (location 5) only the  $x$ -component ( $\mathbf{p} \cdot \hat{\mathbf{x}}$ ) contributes to the  
903 signal, in the other locations both the  $x$ - and  $y$ -components contribute.

#### 904 3.2. Network activity and extracellular measurements

905 The second main new feature of LFPy2.0 is the possibility to simulate recurrently connected networks of  
906 neurons in parallel. Our exemplary network, shown in Fig 4, demonstrating this new feature is based on a sub-  
907 set of cortical single-cell models, synapse models and connectivity data from Markram et al. [2015] obtained  
908 from The Neocortical Microcircuit Collaboration (NMC) Portal [Ramaswamy et al., 2015]. The implementation  
909 is described in detail in Section 2.6.

910 In addition to supporting simulations of neuronal networks with biophysically detailed single-neuron mod-  
911 els in parallel, LFPy2.0 allows for concurrent calculations of extracellular measures of network activity. Specif-  
912 ically, the extracellular potentials at specific positions can be computed at each time step which avoids the  
913 memory-demanding process of recording transmembrane currents in all compartments for the duration of the  
914 simulation, either to disk or to memory. In the present example, the current dipole moment was calculated

915 at every time step, and this amounted to a useful dimensionality reduction, as only the  $x, y, z$ -axis compo-  
916 nents of  $\mathbf{p}$  per population  $X$  had to be stored. Assuming serial execution, then for each neuron population  
917  $X$ , the total memory consumption is then reduced by a factor  $3/(N_X n^{\text{seg}})$  where  $N_X$  is the population size  
918 and  $n^{\text{seg}}$  the number of compartments per neuron (see panel A for values), compared to storing currents.  
919 The per-population current dipole moments were then used to predict EEG scalp surface potentials and MEG  
920 signals in the corresponding locations. Note that per-population current dipole moments can be stored, EEG  
921 and MEG signal can be computed with other head models at a later stage.

### 922 3.2.1. Network spiking activity

923 Fig 5 shows the various predicted measurements for a one-second period of network activity. The spike  
924 raster and corresponding spike-count histogram (panels A and B) demonstrate the network's tendency to pro-  
925 duce synchronous irregular patterns of activity with the parameterization summarized in Section 2.6, Tables  
926 1-3 and Fig 4B. The per-neuron spike occurrences in the excitatory populations L4\_PC and L5\_TTPC1 were  
927 sparser than for the inhibitory populations L4\_LBC and L5\_MC. As in the full circuit of Markram et al. [2015], it  
928 is possible that an asynchronous network state could have been obtained by modifying extracellular  $[\text{Ca}^{2+}]_o$ -  
929 dependent release probabilities  $P_u$  for the different synapse types in the model [Borst, 2010; Markram et al.,  
930 2015]. A modification of release probabilities can shift the effective balance between excitatory and inhibitory  
931 synapse activations, but also incorporation of a larger sample of heterogeneous cell types in the model could  
932 have brought the network into an asynchronous state, essentially by increasing the amount of inhibitory feed-  
933 back. In particular interneuron expression in neocortex is known to be more heterogeneous and more dense  
934 than demonstrated here [Markram et al., 2004, 2015]. However, as our main focus here is to present new  
935 simulation technology now incorporated in LFPy, we did not pursue this line of inquiry.

### 936 3.2.2. Local field potentials (LFPs)

937 The extracellular potentials as would be measured by a 16-channel laminar probe positioned through  
938 the center axis of the cylindrical column, are shown in Fig 5C. The computed extracellular potentials are  
939 observed to be of the same order of magnitude as experimentally measured spontaneous potentials ( $\approx 0.1$ –  
940 1 mV, see Maier et al. [2010]; Hagen et al. [2015]; Reyes-Puerta et al. [2016]). We further observe that  
941 the synchronous events seen in the spiking activity (panel A) are reflected as substantial fluctuations in the  
942 extracellular potential with amplitudes close to 0.5 mV.

943 The signals in neighboring channels are further observed to be fairly correlated with comparable ampli-  
944 tudes, irrespective of the presence of somatic compartments at the depths of the contacts (Fig 4F). At the  
945 superficial channels 1–6, deflections in the electric potential following synchronous network activation are  
946 predominantly negative, while a change in sign occur around channel 7 (near the boundary between layer 3  
947 and 4). The strongest deflections of the extracellular potential are typically observed at contacts within layer  
948 5 (ch. 11–13), that is, at depths corresponding to the dense branching of basal dendrites and somas of the  
949 large layer 5 pyramidal neuron population. These deflections reflect that the soma compartments and basal  
950 dendrites are expected to act as dominant sources of the transmembrane currents setting up the extracellular  
951 potential [Lindén et al., 2010]. Adding further to this, layers 4 and 5 also had the highest overall densities of  
952 excitatory and inhibitory synapses in the present model (Fig 4G). Some spike events (extracellular signatures  
953 of action potentials) are seen in ch. 14, produced by one or several neurons located near the virtual recording  
954 device.

955 Further investigation of the different contributors (Fig 6A-D) to the extracellular potential (Fig 5C), revealed  
956 that most of the signal variance across depth can be explained by transmembrane currents of the two excita-  
957 tory populations (Fig 6E). Even if the cell numbers in the two pyramidal-cell population were similar, population  
958 L5\_TTPC1 contributed more to the signal than population L4\_PC at all channels except at channel 9 (around  
959 which the L4\_PC somas are positioned).

### 960 3.2.3. ECoG signal

961 Fig 5D compares the extracellular potential in the topmost channel 1 (gray line), predicted under the  
962 assumptions of dendritic line sources, somatic spherical sources and an infinite homogeneous extracellular  
963 medium (cf. Eq (7)), with our ECoG prediction at the same depth (black line). The ECoG signal was computed  
964 assuming a wide contact ( $r_{\text{contact}} = 250 \mu\text{m}$ ) aligned horizontally on top of a flat cortex ( $z = 0$ ). Further, for  
965 the ECoG signal the method-of-images (Mol; cf. Eq (11)) was used to account for a conductivity discontinuity  
966 at the cortical surface. Here, zero conductivity (mimicking, for example, the situation with an insulating mat  
967 surrounding the ECoG contact [Castagnola et al., 2014]) was assumed above the cortical surface, while the  
968 grey-matter value of  $\sigma_e = 0.3 \text{ S/m}$  was assumed below.

969 The amplitude of the ECoG trace was slightly increased compared to the potential measured by the smaller  
970 electrode. This amplitude increase can be attributed to the fact that a reduction in conductivity above the  
971 boundary would decrease the value of the denominator of Eq (11), and hence increase the signal amplitude  
972 below insulating cortical surfaces [Pettersen et al., 2006]. The expected increased signal amplitude from this  
973 conductivity step is here counter-measured by the larger diameter of the ECoG contact ( $r_{\text{contact}} = 250 \mu\text{m}$   
974 vs.  $r_{\text{contact}} = 5 \mu\text{m}$ ) resulting in an increased average distance from the signal source to the contact point  
975 averaged over the contact's surface. Detailed investigation of each signal normalized to the same standard  
976 deviation (not shown) revealed virtually indistinguishable features across time and in their power spectra.

### 977 3.2.4. Current dipole moments

978 Fig 5E shows the three components of the total current dipole moment  $\mathbf{p}$  stemming from the network ac-  
979 tivity. The most striking feature is the much larger  $z$ -component compared to the lateral  $x$ - and  $y$ -components.  
980 This large difference in component size, about two orders for magnitude, reflects (i) that the vertically aligned  
981 pyramidal cell morphologies span across several layers, and (ii) the near rotational symmetry of the model  
982 populations around the  $z$ -axis. Unlike the  $z$ -component, the lateral components largely cancel out. In the same  
983 way as for the extracellular potential, the two pyramidal populations are also the dominant sources of the total  
984 dipole moment (Fig 6F-J). We also note that the  $z$ -component of the population current dipole moment gener-  
985 ally dominates the other components of the population dipoles, with the exception of the L4\_LBC population.  
986 Here all components are tiny, reflecting the stellate dendritic morphology and the evenly distributed synapses  
987 onto the neurons in this population.

988 For our model network we note that the maximum magnitude of the current dipole moment is about  
989 0.1 nAm, which is about two orders of magnitude smaller than previously estimated typical 'mesoscopic'  
990 dipole strengths [Hämäläinen et al., 1993, p. 418].

### 991 3.2.5. EEG signals

992 As a demonstration of predicting non-invasive electric ('EEG') signals outside of the brain with LFPy2.0,  
993 we utilized the four-sphere head model (as implemented in class `FourSphereVolumeConductor`, see  
994 [Methods](#)) and defined scalp-layer measurement locations as illustrated in Fig 5F. We assumed the modeled  
995 network to represent a piece of cortical network positioned at the top of a cortical gyrus, so that the popu-  
996 lation axes were in the radial direction of the spherical head model. The current dipoles (computed above)  
997 were positioned below the interface between the CSF and the brain, more specifically the layer-4 and layer-5  
998 population dipoles were positioned at the depth of the center of layer 4 and layer 5, respectively.

999 As observed in Fig 5G, the temporal form of the scalp potentials corresponds directly to the temporal  
1000 form of the dominant  $z$ -component of the current dipole moment in panel E. For an infinite volume conductor  
1001 it follows directly from Eq (15) that the recorded scalp potential will be proportional to this dipole moment  
1002 at recording positions directly (radially) above the dipole location. Likewise, inspection of the formulas for  
1003 the four-sphere head model shows that this is also the case for the scalp-potential contributions from both  
1004 the radial (Eq (16)–Eq (17)) and tangential (Eq (18)–Eq (19)) dipole components (although with different  
1005 proportionality constants for the two components).

1006 For the present example network comprising 5594 neurons of which 5077 are pyramidal cells, we observe  
1007 the magnitudes of the fluctuating scalp potential directly on top of the dipole sites to be on the order of 0.1  $\mu\text{V}$ .

1008 This is about two orders of magnitude smaller than the typical size of measured EEG signals of  $\sim 10 \mu\text{V}$  [Nunez  
1009 and Srinivasan, 2006, Fig. 1.1].

1010 The weakly conducting skull layer (compared to the highly conductive brain, spinal fluid and scalp layers)  
1011 results in a spatial 'low-pass filter effect' from volume conduction [Nunez and Srinivasan, 2006, Ch. 6]. This  
1012 low-pass effect accounts for the relatively weak attenuation of the EEG signal with lateral distance from the  
1013 center position (position 5 in panel F) along the head surface, as observed in panel G. On the surface of a  
1014 spherical volume conductor with homogeneous conductivity inside the sphere, but otherwise zero conductiv-  
1015 ity outside the sphere's surface (1-sphere head model), the potential from a current dipole would decay in  
1016 amplitude at a higher rate compared to our 4-sphere head-model case with a spherical skull layer with low  
1017 conductivity. However, in an infinite homogeneous volume conductor the decay in electric potential along the  
1018 putative sphere's surface would decay with a lower rate than both the 1-sphere and 4-sphere head models,  
1019 see Nunez and Srinivasan [2006, Ch. 6] for a comparison.

### 1020 3.2.6. MEG signals

1021 The computed current dipole moments in Fig 5E was also used to compute MEG signals. Panel H shows  
1022 the computed magnetic fields for the same set-up providing the EEG signals in panel G, that is, radially  
1023 oriented population current dipoles. In this situation the only sizable magnetic field is directed in the tangential  
1024 direction around the vertical  $z$ -axis. With our spherical coordinates this corresponds to the  $\varphi$ -direction where  
1025 the unit vector  $\hat{\varphi}$  points in counter-clockwise direction. Note also that the magnetic field is almost zero straight  
1026 above the dipole (position 5), as here the vectors  $\mathbf{p}$  and  $\mathbf{R}$  are near parallel so that the vector product in Eq (30)  
1027 is very small. We also observe that the magnetic field is symmetric around the center position (position 5), so  
1028 that the field at position 6 is always similar to the field at position 4, and so on.

1029 For EEG signals, equivalent radial dipoles located at the 'crowns' of gyri are generally expected to give  
1030 the largest signal contributions [Nunez and Srinivasan, 2006]. For MEG signals, on the other hand, equivalent  
1031 current dipoles in brain sulci oriented tangentially to the head surface is expected to provide the largest  
1032 signals [Hämäläinen et al., 1993]. In Fig 5I we thus show the magnetic field with the current dipole moment  
1033 in panel E directed in a tangential direction (that is, in the  $y$ -direction into the paper in panel F) rather than  
1034 in the radial direction. In this situation the largest magnetic field component is in the tangential direction  $\hat{\theta}$   
1035 (around the  $y$ -axis) in position 5. The  $\hat{\varphi}$ -component is as expected negligible, while the radial component is  
1036 antisymmetric around position 5, but negligible in position 5.

1037 Typical magnetic fields measured in human MEG are on the order of 50–500 fT [Hämäläinen et al., 1993],  
1038 and in Fig 5I we find that magnetic fields of similar magnitudes ( $\sim 100$  fT) are predicted when the current  
1039 dipole moment from our network is oriented in parallel to the cortical surface. Note, however, that in our  
1040 model set-up, the dipole is only 11 mm away from the closest MEG sensor at position 5, while in human  
1041 recordings the minimum distance between tangential dipoles in brain sulci and the MEG sensors may be  
1042 several centimeters [Hämäläinen et al., 1993]. As the magnetic field from a current dipole decays as the  
1043 square of the distance (see Eq (30)), our model likely gives an overestimate of the contribution to the MEG  
1044 signal from our model network when applied to a human setting.

1045 In Fig 5H we also observe sizable magnetic fields ( $\sim 20$ – $40$  fT) generated by radially-oriented current  
1046 dipoles. However, the generated fields are in the angular  $\phi$ -direction where the fields have opposite directions  
1047 on each side of the central position (position 5). Thus, in a setting with several such neighbouring dipoles  
1048 (generated by neighbouring populations) on cortical gyri, there will be large cancellations effects. Despite the  
1049 larger distances from the MEG sensors, tangentially oriented dipoles in sulci is therefore expected to dominate  
1050 the measured MEG in human settings [Hämäläinen et al., 1993].

### 1051 3.3. LFPy parallel network performance

1052 In order to assess the performance figures of multicompartment-neuron network implementations in LFPy  
1053 on a high-performance computing (HPC) facility, we performed a series of simulations with two-population  
1054 versions of the network presented above. These modified networks consisted only of the layer-5 m-types



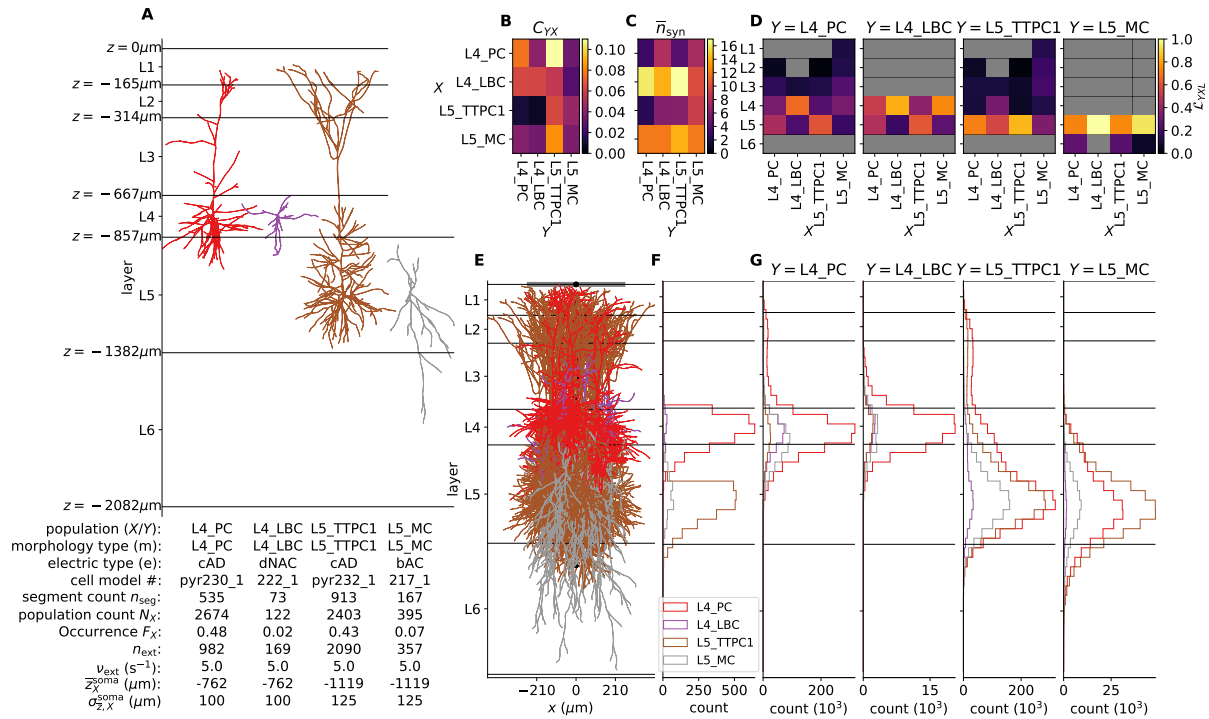

**Figure 4: Details of the example network.** **A** Biophysically detailed neuron models of the network, with depth-values of boundaries of layers 1-6. The lower left table summarizes population names ( $X$  – presynaptic;  $Y$  – postsynaptic) which here coincide with morphology type (m); electric type (e); cell model #; compartment count per single-cell model ( $n_j^{\text{seg}}$ ); number of cells  $N_X$  in each population; occurrence  $F_X$  (defined as  $N_X / \sum_X N_X$ ); the number of external synapses on each cell  $n_{\text{ext}}$ ; rate expectation of external synapses  $\nu_{\text{ext}}$ ; the expected mean  $\bar{z}_{\text{soma}}^{\text{norm}}$  and standard deviation  $\sigma_{z,X}^{\text{soma}}$  of the normal distribution  $\mathcal{N}$  from which somatic depths are drawn. **B** Pairwise connection probability  $C_{YX}$  between cells in presynaptic populations  $X$  and postsynaptic populations  $Y$ . **C** Average number  $\bar{n}^{\text{syn}}$  of synapses created per connection between  $X$  and  $Y$ . **D** Layer specificity of connections  $\mathcal{L}_{YXL}$  [Hagen et al., 2016] from each presynaptic population  $X$  onto each postsynaptic population  $Y$ . Gray values denote  $\mathcal{L}_{YXL} = 0$ . **E** Illustration of cylindrical geometry of populations including a laminar recording device for extracellular potentials (black circular markers) and a single ECoG electrode above layer 1 (gray line).  $n = 20$  neurons of each population are shown in their respective locations. **F** Laminar distribution of somas for each network population ( $\Delta z = 50 \mu\text{m}$ ) in one instantiation of the circuit. **G** Laminar distribution of synapses across depth onto each postsynaptic population  $Y$  from presynaptic populations  $X$  ( $\Delta z = 50 \mu\text{m}$ ).

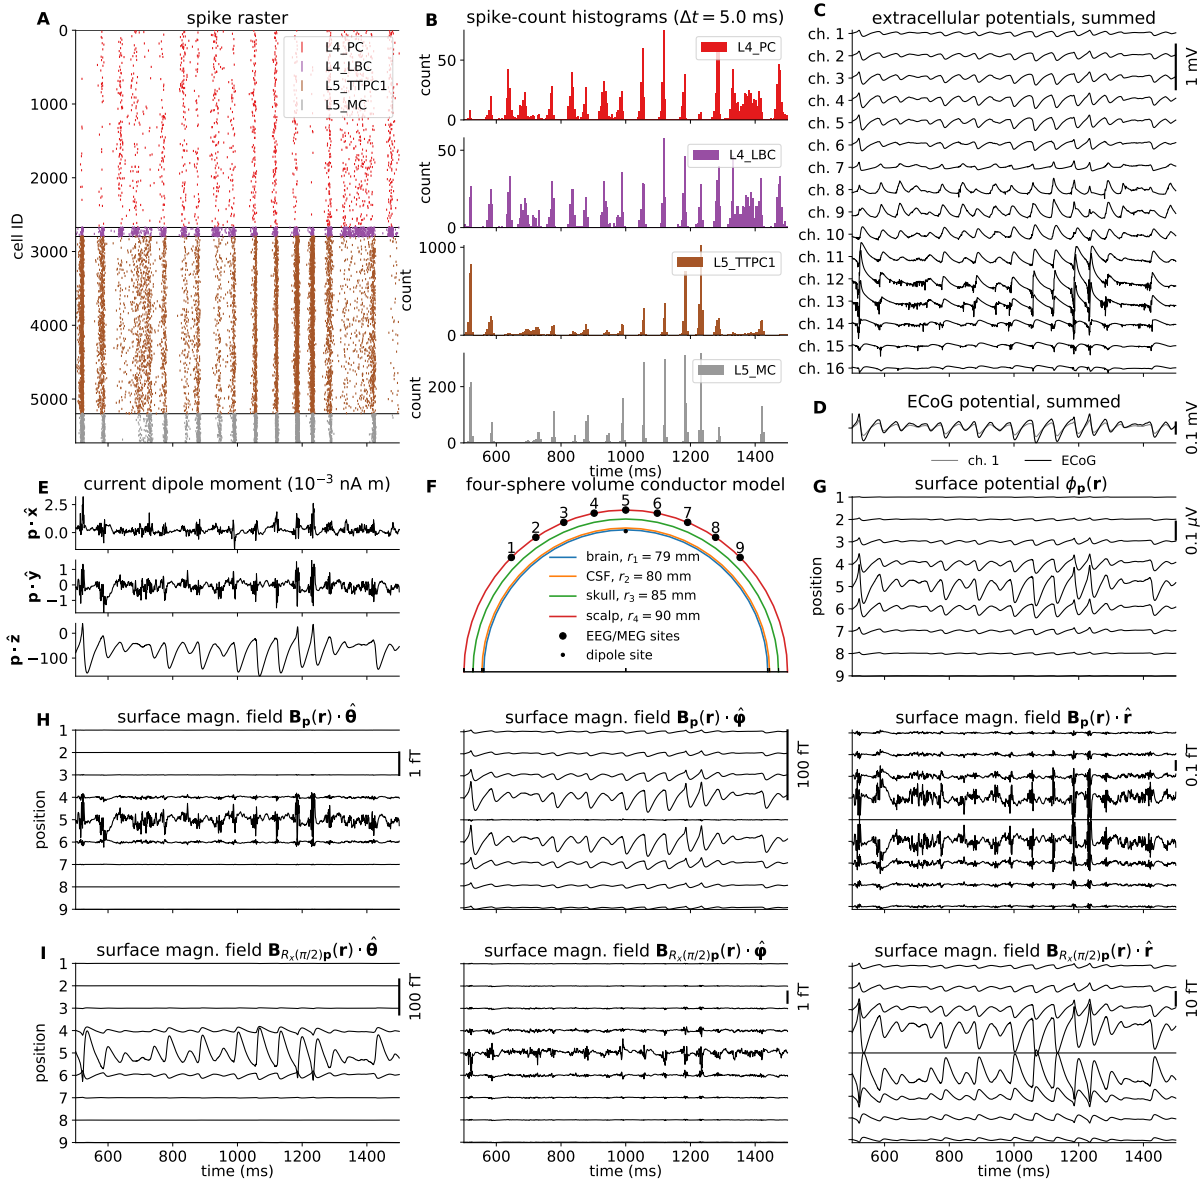

**Figure 5: Intra- and extracellular measures of activity in example network.** **A** Spike raster plot for each population. Each row of dots corresponds to the spike train of one neuron, color coded by population. **B** Population spike rates computed by summing number of spike events in each population in temporal bins of width  $\Delta t = 5$  ms. **C** Extracellular potentials as function of depth assuming an infinite volume conductor. **D** Extracellular potential on top of cortex (ECoG) assuming a discontinuous jump in conductivity between brain ( $\sigma = 0.3$  S/m) and a non-conducting cover medium ( $\sigma = 0$  S/m) and electrode surface radius  $r = 250 \mu\text{m}$ . The signal is compared to the channel 1 extracellular potential in panel C (gray line). **E** Component-wise contributions to the total current dipole moment  $\mathbf{p}(t)$  summed over population contributions. **F** Illustration of upper half of the four-sphere head model (with conductivities  $\sigma_s \in \{0.3, 1.5, 0.015, 0.3\}$  S/m and radii  $r_s \in \{79, 80, 85, 90\}$  mm for brain, csf, skull, and scalp, respectively), dipole location in inner brain sphere and scalp measurement locations. The sites in the  $xz$ -plane numbered 1-9 mark the locations where electric potentials and magnetic fields are computed, each offset by an arc length of  $r_4\pi/16 \approx 18$  mm. **G** EEG scalp potentials from multicompartment-neuron network activity with radially oriented populations. **H** Tangential and radial components of the head-surface magnetic field (MEG) from multicompartment-neuron network activity with radially oriented population. **I** Tangential and radial components of the magnetic field (MEG) on the head surface, with underlying dipole sources rotated by an angle  $\theta = \pi/2$  around the  $x$ -axis (thus with apical dendrites pointing into the plane). (Note that at position 5, the unit vectors  $\hat{\varphi}$  and  $\hat{\theta}$  are defined to be directed in the positive  $y$ - and  $x$ -directions, respectively.)

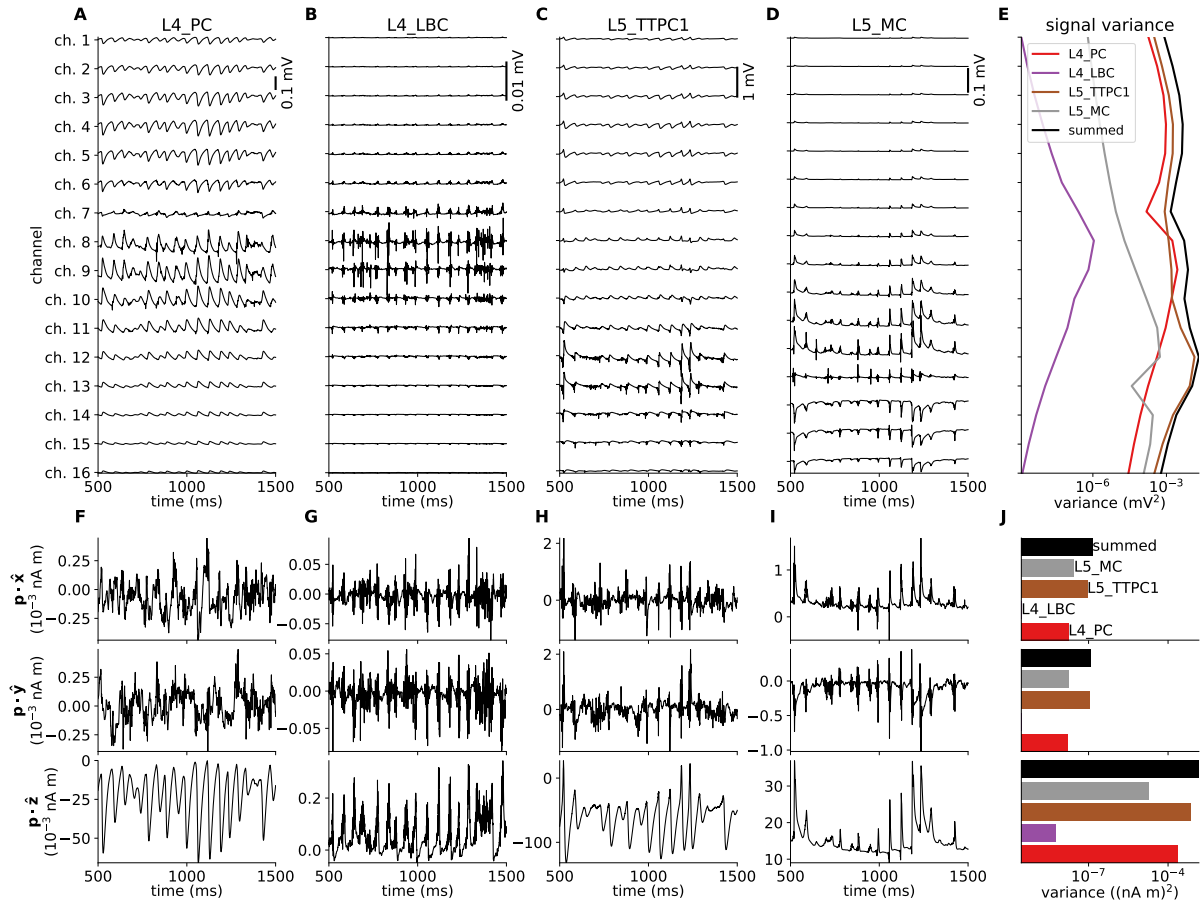

Figure 6: **Per-population contributions to the extracellular potential and current dipole moment and corresponding signal variance.** **A-D** Contributions to the extracellular potential from populations  $X \in \{L4\_PC, L4\_LBC, L5\_TTPC1, L5\_MC\}$  in the network across depth. **E** Extracellular potential variance across depth for contributions of each population, and for the sum over populations. **F-I**  $x, y, z$ -components of the per-population contribution to the summed current dipole moment. **J** Per-component current dipole moment variance for each population and for summed signals.

1055 L5\_TTPC1 and L5\_MC. We modified cell counts per population  $N_X$  and connection probabilities  $C_{YX}$  de-  
 1056 pending on chosen network population sizes  $N_X$  as noted in the text below. All other simulation parameters  
 1057 were kept fixed as given in Tables 1-3.

1058 First, we compared set-up times, creation times of populations and connections, and simulation times  
 1059 for instantiations of similarly sized reference networks ( $N_{L5\_TTPC1}^{(1)} = 2400, N_{L5\_MC}^{(1)} = 480$ ) for different  
 1060 number of MPI processes  $N_{MPI}$  (Fig 7A).  $N_{MPI}$  was set identical to the number of available physical cores  
 1061 (no multi-threading). A seed value for the random number generator for each network instantiation was varied  
 1062 to obtain an  $N = 3$  sample size for each tested value of  $N_{MPI}$ . Both with predictions of extracellular potentials  
 1063 and current dipole moments (continuous lines) and without (dotted lines), the biggest fraction of the total  
 1064 computational time was spent during the main simulation part (red curves), that is, where the simulation is  
 1065 advanced time step by time step. The additional computational cost of computing extracellular potentials and  
 1066 current dipole moments was less than half compared to just simulating the spiking activity in the recurrently  
 1067 connected network. The times spent creating all recurrent connections and synapses (green curves) were  
 1068 between a factor 16 and 32 shorter than the simulation time.

1069 The creation of connections and simulation times scaled strongly with  $N_{MPI}$ . An optimal, or strong, log-  
 1070 log-linear scaling curve can be represented as a function  $t(N_{MPI}) \propto N_{MPI}^{-1}$ , in particular for  $N_{MPI} \leq 480$ , as  
 1071 these  $N_{MPI}$ -values result in an even load balance across parallel processes with the presently used round-  
 1072 robin distribution of cells across MPI processes (see Section 2.5 for details). Each parallel process has the  
 1073 same number of cells of each m-type, segments ( $n_j^{seg}$ ) and state variables corresponding to different active  
 1074 ion-channel models. Only variations in per-cell in-degrees (synapse counts) across different processes and  
 1075 simulations occurred due to the random network connectivity model, but even with different random seeds in  
 1076 each trial the trial variability was small (error bars denoting standard deviations are hardly seen).

1077 The creation of populations (orange curves) however showed worse scaling behaviour for  $N_{MPI} > 480$ ,  
 1078 in part due to uneven load balance. Another possible reason for reduced performance was the increased  
 1079 strain on the file system as all processes simultaneously access the same single-neuron source files upon  
 1080 instantiating individual `NetworkCell` objects. This might have been avoided by creating local copies of the  
 1081 necessary files on each compute node, but we did not pursue this here as the overall time spent instantiating  
 1082 neuron populations was only a fraction of the observed simulation times. The loading of parameters and  
 1083 other needed data (blue curves) was, as expected, fairly constant for different values of  $N_{MPI}$  as we did not  
 1084 parallelize the corresponding code.

1085 As a second scaling-performance test, we ran series of simulations with  $N_{MPI} = 480$  but varied the total  
 1086 network size by a factor  $b \in \{0.2, 0.25, 0.5, 1, 2, 4\}$  while keeping the expected number of connections  $K_{YX}$   
 1087 (and thus the number of synapses) between pre- and post-synaptic populations  $X$  and  $Y$  fixed (Fig 7B). The  
 1088 expected number of randomly created (binomially distributed) connections  $K_{YX}$  was calculated using the  
 1089 relation [Potjans and Diesmann, 2014]:

$$C_{YX} = 1 - \left(1 - \frac{1}{N_X N_Y}\right)^{K_{YX}}, \quad (34)$$

1090 with reference network size ( $N_{L5\_TTPC1}^{(1)} = 2400, N_{L5\_MC}^{(1)} = 480$ ) and connection probabilities  $C_{YX}$  as given  
 1091 in Table 3. Similar to the test presented in panel A, most of the total computation time was spent during the  
 1092 main simulation part (red curves), followed by creation of connections (green curves) and loading of different  
 1093 parameters (blue curves).

1094 In contrast to the previous case, the creation of cells in the network displayed strong scaling with network  
 1095 size (which implies a relationship  $t(r) \propto b$ ). The supra-optimal scaling seen for connections can be explained  
 1096 by the creation of similar connection counts across different factors  $b$ . (Note that supra-optimal scaling implies  
 1097 that  $t(r) \propto b^q$  with exponent  $q \in (0, 1)$ , while sub-optimal scaling implies that  $q > 1$ .) For the tested factors  
 1098  $b = 0.25$  and  $b = 0.5$  we expected sub-optimal scaling for creating populations and connections, as well as for  
 1099 simulation duration. These  $b$ -values gave different cell counts and thus inhomogeneous load-balances across

1100 MPI processes, which was unavoidable with the presently used round-robin parallelization scheme. A jump in  
1101 performance was seen for  $b = 0.2$  which resulted in only one multicompartment neuron and corresponding  
1102 calculations on each MPI process.

1103 As a third scaling-performance test we fixed the mean per-cell synapse in-degree  $k_{YX}$  (count of incoming  
1104 connections per cell) and reran network simulations for different network sizes (Fig 7C). The total number  
1105 of connections was thus set to  $bK_{YX}^{(1)}$  and corresponding connection probabilities  $C_{YX}$  were recomputed  
1106 accordingly using Eq (34). As expected, this modification mostly affected the time spent creating connections  
1107 (green curve), and resulted in a near-linear performance curve for scaling factors  $b \geq 1$ .

1108 As a final performance assessment we repeated the experiment described above with upscaled networks  
1109 and increased MPI pool sizes. In Fig 8A we set the reference network population sizes  $N_{L5\_TTPC1}^{(1)} = 12000$   
1110 and  $N_{L5\_MC}^{(1)} = 2400$  and varied  $N_{MPI}$  between 600 and 4800. LFPy's parallel performance was strong also  
1111 here, and Fig 7A consequently shows trends similar to the findings for the smaller network. Here, the time  
1112 spent creating populations (orange curves) was reasonably invariant for different  $N_{MPI}$  values, and increased  
1113 overall by some factor 2-4 compared to the previous case. The parameter loading times were similar, while  
1114 the time spent connecting the network was increased by a factor  $\sim 4$ , but the simulation times increased only  
1115 by a factor  $\lesssim 2$ . The differences in connection and simulation times seen here, can be explained by the fact  
1116 that the typical synapse in-degrees were not preserved. Instead, the synapse in-degrees were increased for  
1117 the larger network, as we used the connection probability values defined in Table 3.

1118 In Fig 8 panels B and C we set  $N_{MPI} = 2400$ , and varied the network population sizes relative to the  
1119 reference network population sizes in panel A by the factor  $b \in \{0.2, 0.25, 0.5, 1, 2, 4\}$ . Again, the performance  
1120 figures were in qualitative agreement with the previous results for the smaller network and smaller MPI pool  
1121 sizes. The population creation times and simulation times with and without signal predictions displayed strong  
1122 scaling with relative network size. The time spent loading parameters was increased by a small amount (by  
1123 a factor  $\lesssim 2$ ), which likely reflected the increased strain on the file and communication system on the cluster,  
1124 due to larger MPI pool sizes. The times spent creating the populations were also here near ideally dependent  
1125 on  $N_{MPI}$  in both panels B and C. As the total number of connections (and synapses) were conserved across  
1126 network population sizes in panel B, the connection times varied only by a factor two from the smallest to the  
1127 largest network. In panel C, where the number of connections per neuron was kept approximately constant, a  
1128 doubling in network size resulted in a doubling in connection times. The larger network simulations required  
1129 approximately twice the amount of time, compared to the smaller network simulations in Fig 7. In panel C,  
1130 simulations with LFP predictions consistently failed for the largest network size ( $b = 4$ ), most likely due to lack  
1131 of available memory to create arrays for storing current dipole moments and extracellular potentials with the  
1132 increased count of instantiated connections.

## 1133 4. Discussion

1134 In the present paper we have presented LFPy2.0, a majorly revised version of the LFPy Python package  
1135 with several added features compared to its initial release [Lindén et al., 2014].

### 1136 4.1. New features in LFPy2.0

1137 The first version of LFPy only allowed for the computation of electrical measurements from activity in single  
1138 neurons or, by trivial parallelization, populations of neurons only receiving feedforward synaptic input. LFPy2.0  
1139 allows for simulations of recurrently connected neurons as well, for example the types of neuronal networks  
1140 in cortex. Further, the first version of LFPy was tailored to compute extracellular potentials (spikes, LFPs)  
1141 inside the brain. Here it was assumed that all active neurons were embedded in an infinite *homogeneous*  
1142 (i.e., same extracellular conductivity everywhere) and *isotropic* (i.e., same extracellular conductivity in all  
1143 directions) volume conductor (Section 2.2.1). LFPy2.0 includes several new features and measures of neural  
1144 activity:

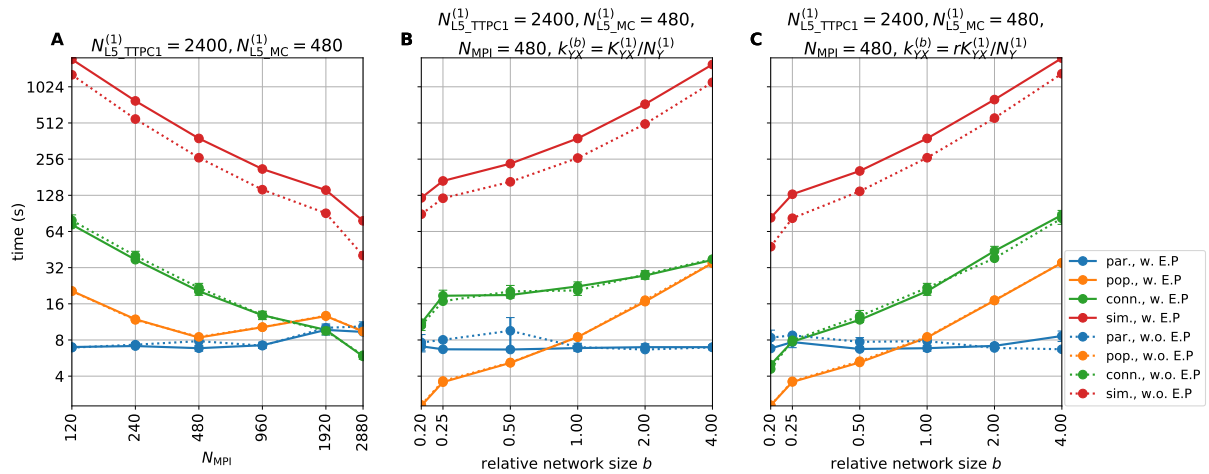

Figure 7: **Parallel performance with networks in LFPy.** **A** Initialization of parameters (par.), population create (pop.), connectivity build (conn.) and main simulation time (sim.) as functions of number of physical CPU cores/MPI processes ( $N_{MPI}$ ). The reference network population sizes  $N_X^{(1)}$  for  $X \in \{L5\_TTPC1, L5\_MC\}$  are given in the panel title. The network was otherwise constructed with synapse, stimulus and connectivity parameters for each possible connection as given in Tables 1-3. Times shown with continuous lines were obtained for simulations that included calculations of extracellular potentials and current dipole moments as in Figures 2-6 (w. E.P.), while times shown with dotted lines were obtained for simulations with no such signal predictions (w.o. E.P.). Each data value is shown as the mean and standard deviation of times obtained from  $N = 3$  network realizations instantiated with different random seeds. **B** Initialization of parameters, population create, connectivity build and main simulation time as functions of network size relative to the reference network population sizes  $N_X^{(1)}$  for  $X \in \{L5\_TTPC1, L5\_MC\}$  as given in the panel title. The superset '(1)' denotes a relative network size  $b = 1$ . Simulations were run using a fixed MPI process count  $N_{MPI}$  and connection probabilities  $C_{YX}^{(r)}$  were recomputed for different values of  $b$ , such that the expected total number of connections  $K_{YX}^{(1)}$  was constant between each simulation (using Eq (34)). The set-up was otherwise identical to the set-up in panel A. **C** Same as panel B, but with a fixed expected per-cell synapse in-degree  $k_{YX}^{(r)} \equiv rK_{YX}^{(1)}/N_Y^{(1)}$  across different relative network sizes.

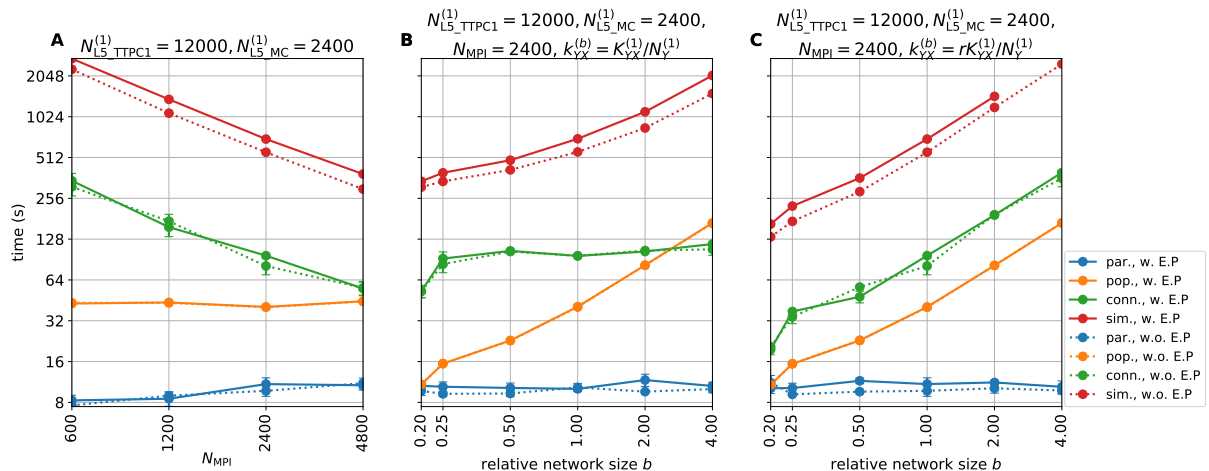

Figure 8: **Parallel performance with networks in LFPy II.** **A** Similar to Fig 7A, but with network population sizes upscaled by a factor 5, and a corresponding increase in parallel job sizes. **B-C** Similar to Fig 7B-C, but with network population sizes and parallel job sizes increased by a factor 5.

- 1145 • Stepwise discontinuities in the extracellular conductivity, such as at the cortical surface, can be included  
1146 by means of the Method-of-Images (Section 2.2.2) to compute potentials immediately below or on the  
1147 cortical surface (i.e., electrocorticographic recordings; ECoG). This approach can also be applied in the  
1148 computation of potentials recorded by microelectrode arrays (MEAs) [Ness et al., 2015].
- 1149 • Cylindrical anisotropic conductivity (Section 2.2.3) can be included in the computation of spikes and  
1150 LFPs, reflecting for example that in cortex and hippocampus the conductivity might be larger in the  
1151 depth direction (along the apical pyramidal-neuron dendrites) than in the lateral directions [Goto et al.,  
1152 2010].
- 1153 • Current dipole moments from single neurons and populations of neurons are computed (Section 2.3.1)  
1154 for later use in calculation of signals of systems-level electrical and magnetic recordings (EEG, ECoG,  
1155 MEG), also for more detailed head models than what is considered presently in LFPy2.0 (as described  
1156 in next two items).
- 1157 • Electrical potentials at the scalp (electroencephalographic recordings; EEG) are computed from the  
1158 current dipole moments and spherical head models, in particular the four-sphere head model [Nunez  
1159 and Srinivasan, 2006; Næss et al., 2017], cf. Section 2.3.3. This four-sphere head also predicts ECoG  
1160 signals (Section 2.3.4).
- 1161 • Magnetic fields outside the head (magnetoencephalographic recordings; MEG) can be computed from  
1162 the current dipole moments assuming a spherically symmetric head model (Section 2.3.5). Likewise,  
1163 magnetic field inside the brain can be computed directly from neuronal axial currents (Section 2.4).

1164 LFPy2.0 also includes much more rigorous code testing with more than 260 unit tests, automated build  
1165 testing with TravisCI ([travis-ci.org/LFPy/LFPy](https://travis-ci.org/LFPy/LFPy)) with different versions of Python (2.7, 3.4-3.6), test coverage of  
1166 code using coveralls ([coveralls.io/github/LFPy/LFPy](https://coveralls.io/github/LFPy/LFPy)), automated documentation builds using Read the Docs  
1167 (<http://lfp.readthedocs.io>), and several updated example files, as well as new examples demonstrating differ-  
1168 ent scientific cases using the new functionalities. The software runs on a wide variety of operating systems,  
1169 including Linux, Mac OS and Windows.

#### 1170 4.2. Example applications

1171 To illustrate some of the new measurement modalities incorporated in LFPy2.0 we showed in Fig 2 the LFP  
1172 and EEG signature of a simple pyramidal-like neuron receiving a single excitatory synaptic input on its apical  
1173 dendrite. In this example the extracellular medium was assumed to be homogeneous, and a characteristic  
1174 dipolar profile was observed in the extracellular potential (panel B). The accuracy of the far-field electrical  
1175 dipole approximation (Eq (15)) for distances of a few millimeters or more away from the neuronal source, was  
1176 also demonstrated. The corresponding magnetic field set up by the neuron (panel C) was quite distinct from  
1177 the electric potential pattern, but also here far-field magnetic dipole approximation (Eq (30)) was observed to  
1178 be accurate some distance away.

1179 To illustrate the implementation of networks in LFPy2.0 we showed in Section 2.5 a code example for a  
1180 small network using simplified ball-and-stick neurons connected by conductance-based synapses. Our main  
1181 example applications were on a network of about 5500 morphologically and biophysically detailed neuron  
1182 models from the reconstructed somatosensory cortex column of Markram et al. [2015], connected using  
1183 probabilistic synapse models with short-term plasticity. For this example, Fig 6 provided results for a one-  
1184 second epoch of network activity where spikes (panels A, B), LFPs inside the cortical model column (panel  
1185 C), the ECoG signal recorded at cortical surface (panel D), and the net current dipole moment (panel E)  
1186 were depicted. The computed current dipole moment was further used to compute the corresponding EEG  
1187 signal with the four-sphere head model for the situation where the model network was placed on top of a  
1188 cortical gyrus where the apical dendrites of the pyramidal neurons, and thus the current dipole moment, is  
1189 pointing in the radial direction (panel G). The same current dipole moment was also used to compute the

1190 MEG signal, assuming a spherically-symmetric head volume-conductor model, both for the case when the  
1191 net current dipole is directed perpendicular (panel H) and parallel (panel I) to the scalp. The latter situation  
1192 could correspond to the case where the model network is positioned in a cortical sulcus.

1193 While the example network was set up mainly to demonstrate the new features in LFPy2.0, some of the  
1194 example results are notable. As expected the two excitatory pyramidal cell populations in the network provided  
1195 almost all of the recorded LFP signal (except in the deep layers where the layer-5 inhibitory Martinotti-cell  
1196 population also gave a sizable contribution), cf. Fig 7E. Likewise, the two excitatory pyramidal cell populations  
1197 also gave the dominant contributions to the net current dipole moment providing the EEG and MEG signals  
1198 (Fig 7J).

1199 For the present example network comprising about 5000 pyramidal neurons, we observed the maximum  
1200 magnitude of the EEG signal to be about  $0.1 \mu\text{V}$  (Fig 6G), that is, about two orders of magnitude smaller  
1201 than the typical size of measured EEG signals of  $\sim 10 \mu\text{V}$  [Nunez and Srinivasan, 2006, Fig. 1.1]. Thus our  
1202 example model network appears too small, that is, it incorporates too few pyramidal neurons, to account for  
1203 the typical experimentally recorded EEG signal amplitudes.

1204 The maximum magnetic field computed at the cortical surface was seen in Fig 5H–I to be about 100 fT,  
1205 that is, similar in magnitude to typical magnetic fields measured by MEG sensors in a human setting ( $\sim 50$ –  
1206  $500$  fT [Hämäläinen et al., 1993]). However, our model predictions assumed the minimum distance between  
1207 the current dipoles and the magnetic-field recording device to be only about a centimeter, likely much smaller  
1208 than the typical minimal distance between the dominant tangential dipoles in cortical sulci and the human  
1209 MEG sensors. Since the magnetic field around a current dipole decays as the square of the distance, our  
1210 modeling likely substantially overestimates the magnetic field that would be produced by the computed current  
1211 dipoles in a human setting.

#### 1212 4.3. Use of LFPy

1213 *Comparison of candidate models with experiments.* An obvious application of LFPy is, following the tradition  
1214 of physics, to (i) compute predictions of the various available measures of neural activity from different candi-  
1215 date models and (ii) identify which model, or which class of models, is in best agreement with the experimental  
1216 data. While not always possible, the approach is preferably pursued on multimodal data measured simulta-  
1217 neously (for example simultaneous recordings of spikes, LFP and ECoG). The multi-objective comparison of  
1218 experimental data with candidate models is a subject on its own, and will not be discussed here (but see, for  
1219 example, Druckmann et al. [2007]).

1220 *Validation of data analysis methods.* Neuroscience relies on data analysis, and data analysis methods should  
1221 be validated [Denker et al., 2012]. An important application of LFPy could be to provide model-based ground-  
1222 truth benchmarking data for such validation. This approach has already been used with biophysically de-  
1223 tailed neuron models to test methods for spike sorting [Einevoll et al., 2012; Hagen et al., 2015; Lee et al.,  
1224 2017], neuron classification [Buccino et al., 2017], estimation of firing rates from multi-unit activity (MUA) [Pet-  
1225 tersen et al., 2008], current-source density (CSD) analysis [Pettersen et al., 2008; Łęski et al., 2011; Ness  
1226 et al., 2015], independent component analysis (ICA) [Głąbska et al., 2014] and laminar population analysis  
1227 (LPA) [Głąbska et al., 2016].

1228 Likewise, LFPy could be used to aid in the interpretation of various statistical measures of electrophysi-  
1229 ological activity such as *spike-triggered LFP* or *mutual information* [Einevoll et al., 2013]. The interpretation  
1230 of these measures in terms of the underlying neural network activity is a priori not trivial, but intuition and  
1231 understanding can be gained by LFPy model investigations where simulation results can be compared with  
1232 neural activity directly. An example of this was given in Hagen et al. [2016]. There the spike-triggered LFP as  
1233 measured in the model simulation was compared with other ways of accounting for spike-LFP relationships  
1234 with a simpler physical explanation, that is, the LFP signature following activation of a presynaptic neural  
1235 population.



1236 It should be noted that the LFPy network model does not necessarily have to be finely tuned to a particular  
1237 experimental system in order for it to be suitable for validation of data analysis methods: Methods claimed to  
1238 have fairly general applicability should also be applicable to biologically plausible example network models.

1239 *Testing of simplified modeling schemes.* LFPy now allows for the concurrent simulation of intracellular (mem-  
1240 brane potential) and extracellular signals (spikes, MUA, LFP, EEG, MEG) for recurrent networks of biophys-  
1241 ically and morphologically detailed neuron models. Such network models are computationally demanding to  
1242 run [Markram et al., 2015], in particular when extracellular signals are computed simultaneously [Reimann  
1243 et al., 2013]. A computationally less demanding alternative is a *hybrid LFP* scheme where the network dy-  
1244 namics, that is, spikes, are modeled with simple point-neuron models such as the integrate-and fire model,  
1245 and the stored spikes are played back in a second computational step computing the extracellular potentials  
1246 using multicompartment neuron models [Mazzoni et al., 2015; Hagen et al., 2016].

1247 This scheme requires that salient features of spiking activity of networks of detailed multicompartment  
1248 neuron models can be accurately captured by point-neuron network models. This was for example demon-  
1249 strated by Rössert et al. [2016] who reproduced key network behaviour of a reconstructed somatosensory  
1250 column [Markram et al., 2015] by systematic mapping of synaptic input to somatic responses in generalized  
1251 leaky integrate-and-fire neurons. Likewise, the accuracy of the second step in the hybrid scheme where the  
1252 extracellular potential is computed, can be systematically tested by comparing resulting predicted extracellular  
1253 potential with the ground-truth potentials provided by LFPy. The same approach can naturally also be applied  
1254 to test other simplified schemes for computing extracellular signals.

#### 1255 4.4. Possible refinements of measurement models in LFPy

1256 *Frequency-dependence of extracellular conductivity.* The present forward-modeling schemes for electrical  
1257 potentials assume the extracellular conductivities  $\sigma_e$  to be independent of frequency. If such a frequency  
1258 dependence is found and described, it can in principle be straightforwardly incorporated by considering each  
1259 frequency (Fourier) component of recorded signal independently. This was, for example, pursued in Miceli  
1260 et al. [2017] where each frequency component of the spikes and LFP signals were computed independently  
1261 (i.e., each frequency component had a specific value of  $\sigma_e$  and a corresponding phase shift required by the  
1262 Kramers-Kronig relations to preserve causality) and eventually summed to provide the full electric potential.  
1263 However, on balance the experimental evidence points to at most a weak frequency dependence of  $\sigma_e$  with  
1264 only minor putative effects on the recorded spikes and LFPs [Miceli et al., 2017]. Therefore, the present  
1265 approximation in LFPy2.0 to assume a frequency-independent conductivity  $\sigma_e$ , seems warranted.

1266 *Modeling of ECoG signals.* LFPy2.0 provides two different methods for computing ECoG signals, that is, sig-  
1267 nals at the cortical surface: the method-of-images (Mol) Section 2.2.2 and the four-sphere model Section 2.3.4  
1268 which both have their pros and cons. The Mol method assumes a planar cortical interface and that the media  
1269 above this interface can be described electrically by means of a single isotropic electrical conductivity. The  
1270 four-sphere model assumes a spherical cortical surface and uses the far-field dipole approximation which  
1271 requires the dipolar sources to be sufficiently far away from the recording contacts. With the present use of  
1272 current dipole moments representing entire neuron populations, this approximation is challenged by the rel-  
1273 atively short distance between in particular the most superficial populations and the cortical surface [Næss,  
1274 2015]. A future project is to systematically explore the accuracy of these two methods for ECoG modeling, for  
1275 example by comparing their predictions for different situations.

1276 The present forward modeling of electrical potentials are based on stylized spatial (planar/spherical ge-  
1277 ometries, step-wise varying conductivities) and directional (isotropy/cylindrical anisotropy) variations. More  
1278 complicated models for the variation of the extracellular conductivity can be accounted for by means of finite-  
1279 element modeling (FEM, Logg et al. [2012]; Lempka and McIntyre [2013]; Ness et al. [2015]; Næss et al.  
1280 [2017]) for which the ‘lead field’, that is, the contribution from transmembrane currents or dipole moments to  
1281 electric signals, always can be computed [Malmivuo and Plonsey, 1995]. FEM could, for example, be used to  
1282 explore in detail how the recording device affects the recorded ECoG signal when a grid of ECoG contacts

1283 are embedded in an insulating material (see, for example, [Castagnola et al. \[2014\]](#)), in analogy to the study  
1284 of multielectrode arrays (MEAs) in [Ness et al. \[2015\]](#).

1285 *More complicated head models.* The current dipole moments computed by LFPy can also be used to compute  
1286 EEG and MEG signals based on geometrically detailed head models measured by MRI [[Bangerter et al., 2010](#);  
1287 [DeMunck et al., 2012](#); [Vorwerk et al., 2014](#); [Huang et al., 2016](#)]. Note, however, that geometrically detailed  
1288 head models do not automatically transfer to electrically detailed head models, and it is thus not always  
1289 clear how much accuracy is gained by using such models rather than the simpler head models currently  
1290 implemented in LFPy (see discussion in [[Nunez and Srinivasan, 2006](#), Ch. 6]).

#### 1291 4.5. Possible improvements of LFPy code

1292 While we here demonstrated a relatively strong scaling of parallel network implementations in LFPy, the  
1293 code itself could be further optimized for improving overall simulation speeds and reduced memory consump-  
1294 tion allowing for larger networks for any given MPI pool size.

1295 One common way of improving efficiency of Python applications is rewriting ‘slow’ code to use Cython  
1296 (C-extensions for Python, <http://cython.org>, [Smith \[2015\]](#)). The current LFPy version uses Cython to a limited  
1297 extent, but remaining code bottlenecks could be identified and addressed accordingly. One potential problem  
1298 with efficient porting of parts of LFPy’s Python code to Cython is repeated calls to NEURON’s Python interface,  
1299 which from a performance point of view should be avoided.

1300 One known bottleneck with parallel implementations of multicompartment neuron networks is uneven load  
1301 balance, resulting from the fact that individual neurons with very uneven numbers of compartments may be  
1302 assigned to the different MPI processes. Uneven load balance could potentially be addressed by incorporating  
1303 the multi-split method described in [Hines et al. \[2008\]](#), as it appears compatible with the presently used  
1304 `CVode.use_fast_imem` method (available since NEURON v7.4). LFPy could then be updated accordingly.

1305 Even without the NEURON multi-split method, distribution of cells among MPI processes using a round-  
1306 robin scheme could, however, be optimized to level out large differences in compartment counts (and cor-  
1307 responding numbers of state variables). Memory consumption could also be addressed by choosing more  
1308 efficient memory structures or generators, for example, for connectivity management, and by avoiding in-  
1309 memory storage of output data wherever possible. File-based I/O operations during ongoing simulations may,  
1310 however, come at the expense of increased simulation times.

1311 In terms of improved support for simulator-independent (agnostic) model description languages for neu-  
1312 ronal models such as NeuroML [[Gleeson et al., 2010](#); [Cannon et al., 2014](#)] or NESTML [[Plotnikov et al.,](#)  
1313 [2016](#)], LFPy’s `TemplateCell` and `NetworkCell` classes already now support loading of active and pas-  
1314 sive single-neuron model files translated to NEURON’s HOC and NMODL languages from NeuroML and  
1315 NeuroML2 (now in development). A growing number of such single-neuron models is becoming available  
1316 through, for example the Open Source Brain initiative (<http://www.opensourcebrain.org>), which can readily be  
1317 used in order to construct new network models. While certainly doable, LFPy is at present not set up for auto-  
1318 matic loading of entire neuron networks specified in NeuroML. Also, single-cell and network models specified  
1319 using LFPy could, in principle, be possible to translate into NeuroML as well, which would allow for executing  
1320 such models using for example NetPyne ([www.neurosimlab.org/netpyne](http://www.neurosimlab.org/netpyne)) or LEMS [[Cannon et al., 2014](#)].

#### 1321 4.6. Other measurement modalities in LFPy

1322 The present version of LFPy only models recording of electric and magnetic brain signals. Optical record-  
1323 ing methods are increasingly used in neurophysiology, however, and forward-modeling of such signals would  
1324 be a natural extension of the present functionality. In voltage-sensitive dye imaging (VSDi), the recorded sig-  
1325 nals reflects a weighted average of the membrane potentials, and such averages can be readily computed  
1326 since the membrane voltages in all neuronal compartments are computed during a network simulation sim-  
1327 ulation [[Chemla and Chavane, 2010a,b](#)]. This must then be combined with proper forward-modeling of the  
1328 propagation of the light through the brain tissue [[Tian et al., 2011](#); [Abdellah et al., 2015, 2017](#)].

1329 Calcium imaging has become a wide-spread method for measuring neural dynamics [Grienberger and  
1330 Konnerth, 2012]. With the use of neuron models that explicitly includes dynamic modelling of the intracellular  
1331 calcium concentrations (for example, Hay et al. [2011]; Almog and Korngreen [2014]) such signals could be  
1332 directly modeled as well.

#### 1333 4.7. Outlook

1334 While information in the brain might largely be represented by spike trains, we believe that tools such  
1335 as LFPy will be instrumental in testing candidate network models aiming to account for this information pro-  
1336 cessing. In the foreseeable future, experimental data against which candidate models can be tested will be a  
1337 limiting factor. It is thus key that such candidate models can be tested not only against spike trains, but also  
1338 other measurement modalities.

1339 This updated version of LFPy makes a major step towards being a true multi-scale simulator of neural  
1340 circuits, allowing for flexible incorporation of highly detailed neuron models at the micrometer scale, yet able  
1341 to also predict recorded signals such as EEG and MEG at the systems-level scale. The largest network  
1342 considered in the here had 57,600 neurons. With the present code, not optimized for numerical efficiency, the  
1343 simulation of 1.5 seconds of biological time on this network required about 1600 CPU hours across 2400 MPI  
1344 processes. With optimized code, we expect that much larger networks can soon be addressed routinely as  
1345 ever more powerful computers gradually become available. The software is also publicly available on GitHub  
1346 and retains the open-source software license of its initial release, and our hope is that continued development  
1347 remains driven by needs and contributions of individuals and groups of researchers.

## 1348 5. Acknowledgements

1349 This work received funding from the European Union Horizon 2020 Research and Innovation Programme  
1350 under Grant Agreement No. 720270 [Human Brain Project (HBP) SGA1], the Norwegian Ministry of Educa-  
1351 tion and Research through the SUURPh Programme and the Norwegian Research Council (NFR) through  
1352 COBRA, CINPLA and NOTUR - NN4661K. We thank Tuomo Mäki-Marttunen for useful comments and dis-  
1353 cussions on the manuscript.

## 1354 6. Bibliography

- 1355 Abdellah, M., Bilgili, A., Eilemann, S., Markram, H., Schürmann, F., 2015. Physically-based in silico light sheet  
1356 microscopy for visualizing fluorescent brain models. *BMC bioinformatics* 16 (11), S8.  
1357 URL <https://doi.org/10.1186/1471-2105-16-s11-s8>
- 1358 Abdellah, M., Bilgili, A., Eilemann, S., Shillcock, J., Markram, H., Schürmann, F., 2017. Bio-physically plausible  
1359 visualization of highly scattering fluorescent neocortical models for in silico experimentation. *BMC bioinfor-*  
1360 *matics* 18 (2), 62.  
1361 URL <https://doi.org/10.1186/s12859-016-1444-4>
- 1362 Almog, M., Korngreen, A., 2014. A quantitative description of dendritic conductances and its application to  
1363 dendritic excitation in layer 5 pyramidal neurons. *Journal of Neuroscience* 34, 182–196.  
1364 URL <https://doi.org/10.1523/JNEUROSCI.2896-13.2014>
- 1365 Anastassiou, C. A., Perin, R., Markram, H., Koch, C., 2011. Ephaptic coupling of cortical neurons. *Nature*  
1366 *neuroscience* 14 (2), 217–223.  
1367 URL <https://doi.org/10.1038/nn.2727>
- 1368 Bangera, N. B., Schomer, D. L., Dehghani, N., Ulbert, I., Cash, S., Papavasiliou, S., Eisenberg, S. R., Dale,  
1369 A. M., Halgren, E., 2010. Experimental validation of the influence of white matter anisotropy on the intracra-  
1370 nial eeg forward solution. *Journal of computational neuroscience* 29 (3), 371–387.  
1371 URL <https://doi.org/10.1007/s10827-009-0205-z>

- 1372 Barbieri, F., Trauchessec, V., Caruso, L., Trejo-Rosillo, J., Telenczuk, B., Paul, E., Bal, T., Destexhe, A., Fer-  
1373 mon, C., Pannetier-Lecoeur, M., et al., 2016. Local recording of biological magnetic fields using giant mag-  
1374 neto resistance-based micro-probes. *Scientific Reports* 6 (39330).  
1375 URL <https://doi.org/10.1038/srep39330>
- 1376 Blagoev, K., Mihaila, B., Travis, B., Alexandrov, L., Bishop, A., Ranken, D., Posse, S., Gasparovic, C., Mayer,  
1377 A., Aine, C., et al., 2007. Modelling the magnetic signature of neuronal tissue. *NeuroImage* 37 (1), 137–148.  
1378 URL <https://doi.org/10.1016/j.neuroimage.2007.04.033>
- 1379 Blakemore, C., Tobin, E. A., 1972. Lateral inhibition between orientation detectors in the cat's visual cortex.  
1380 *Experimental brain research* 15 (4), 439–440.
- 1381 Borst, J. G. G., 2010. The low synaptic release probability in vivo. *Trends in neurosciences* 33 (6), 259–266.  
1382 URL <https://doi.org/10.1016/j.tins.2010.03.003>
- 1383 Brette, R., Destexhe, A. (Eds.), 2012. *Handbook of Neural Activity Measurement*. Cambridge University Press.
- 1384 Buccino, A. P., Ness, T. V., Einevoll, G. T., Cauwenberghs, G., Häfliger, P. D., July 2017. Localizing neuronal  
1385 somata from multi-electrode array in-vivo recordings using deep learning. In: 2017 39th Annual International  
1386 Conference of the IEEE Engineering in Medicine and Biology Society (EMBC). pp. 974–977.  
1387 URL <https://doi.org/10.1109/EMBC.2017.8036988>
- 1388 Buzsáki, G., 2004. Large-scale recording of neuronal ensembles. *Nature Neuroscience* 7 (5), 446–451.  
1389 URL <https://doi.org/10.1038/nn1233>
- 1390 Buzsáki, G., Anastassiou, C. A., Koch, C., 2012. The origin of extracellular fields and currents—EEG, ECoG,  
1391 LFP and spikes. *Nature reviews neuroscience* 13 (6), 407–420.  
1392 URL <https://doi.org/10.1038/nrn3241>
- 1393 Camuñas-Mesa, L. A., Quiroga, R. Q., 2013. A detailed and fast model of extracellular recordings. *Neural*  
1394 *computation* 25 (5), 1191–1212.  
1395 URL [https://doi.org/10.1162/NECO\\_a\\_00433](https://doi.org/10.1162/NECO_a_00433)
- 1396 Cannon, R. C., Gleeson, P., Crook, S., Ganapathy, G., Marin, B., Piasini, E., Silver, R. A., 2014. LEMS: a  
1397 language for expressing complex biological models in concise and hierarchical form and its use in under-  
1398 pinning NeuroML 2. *Frontiers in neuroinformatics* 8, 79.  
1399 URL <https://doi.org/10.3389/fninf.2014.00079>
- 1400 Carnevale, N. T., Hines, M. L., 2006. *The NEURON Book*. Cambridge University Press.  
1401 URL <https://doi.org/10.1017/CBO9780511541612>
- 1402 Caruso, L., Wunderle, T., Lewis, C. M., Valadeiro, J., Trauchessec, V., Rosillo, J. T., Amaral, J. P., Ni, J.,  
1403 Jendritza, P., Fermon, C., Cardoso, S., Freitas, P. P., Fries, P., Pannetier-Lecoeur, M., 2017. In vivo magnetic  
1404 recording of neuronal activity. *Neuron* 95 (6), 1283 – 1291.e4.  
1405 URL <https://doi.org/10.1016/j.neuron.2017.08.012>
- 1406 Castagnola, E., Ansaldo, A., Maggiolini, E., Ius, T., Skrap, M., Ricci, D., Fadiga, L., 2014. Smaller, softer, lower-  
1407 impedance electrodes for human neuroprosthesis: a pragmatic approach. *Frontiers in neuroengineering* 7,  
1408 8.  
1409 URL <https://doi.org/10.3389/fneng.2014.00008>
- 1410 Chemla, S., Chavane, F., 2010a. A biophysical cortical column model to study the multi-component origin of  
1411 the VSDI signal. *Neuroimage* 53 (2), 420–438.  
1412 URL <https://doi.org/10.1016/j.neuroimage.2010.06.026>

- 1413 Chemla, S., Chavane, F., 2010b. Voltage-sensitive dye imaging: technique review and models. *Journal of*  
1414 *Physiology-Paris* 104 (1), 40–50.  
1415 URL <https://doi.org/10.1016/j.jphysparis.2009.11.009>
- 1416 Cserpán, D., Meszéna, D., Wittner, L., Tóth, K., Ulbert, I., Somogyvári, Z., Wójcik, D. K., 2017. Revealing the  
1417 distribution of transmembrane currents along the dendritic tree of a neuron from extracellular recordings.  
1418 *eLife* 6, e29384.  
1419 URL <https://doi.org/10.7554/eLife.29384>
- 1420 Dayan, P., Abbott, L., 2001. *Theoretical neuroscience*. MIT Press, Cambridge.
- 1421 De Schutter, E., Van Geit, W., 2009. Modeling complex neurons. In: De Schutter, E. (Ed.), *Computational*  
1422 *Modeling Methods for Neuroscientists*, 1st Edition. MIT Press, Cambridge, MA, Ch. 11, pp. 260–283.  
1423 URL <https://doi.org/10.7551/mitpress/9780262013277.003.0012>
- 1424 DeMunck, J. C., Wolters, C. H., Clerc, M., 2012. EEG and MEG – forward modeling. *Handbook of Neural*  
1425 *Activity Measurement*.
- 1426 Deng, S., 2008. Electrostatic potential of point charges inside dielectric prolate spheroids. *Journal of electro-*  
1427 *statics* 66 (11), 549–560.  
1428 URL <https://doi.org/10.1016/j.elstat.2008.06.003>
- 1429 Denker, M., Einevoll, G., Franke, F., Grün, S., Hagen, E., Kerr, J., Nawrot, M., Ness, T. B., Wójcik, T. W. D.,  
1430 2012. Report from 1st INCF workshop on validation of analysis methods. Tech. rep., International Neuroin-  
1431 formatics Coordinating Facility (INCF).
- 1432 Djurfeldt, M., 2012. The connection-set algebra—a novel formalism for the representation of connectivity  
1433 structure in neuronal network models. *Neuroinformatics* 10 (3), 287–304.  
1434 URL <https://doi.org/10.3389/conf.fnins.2010.13.00086>
- 1435 Djurfeldt, M., Davison, A. P., Eppler, J. M., 2014. Efficient generation of connectivity in neuronal networks from  
1436 simulator-independent descriptions. *Frontiers in neuroinformatics* 8, 43.  
1437 URL <https://doi.org/10.3389/fninf.2014.00043>
- 1438 Druckmann, S., Baniitt, Y., Gidon, A., Schurmann, F., Markram, H., Segev, I., 2007. A novel multiple objective  
1439 optimization framework for constraining conductance-based neuron models by experimental data. *Front*  
1440 *Neurosci* 1 (1), 7–18.  
1441 URL <https://doi.org/10.3389/neuro.01.1.1.001.2007>
- 1442 Einevoll, G. T., Franke, F., Hagen, E., Pouzat, C., Harris, K. D., 2012. Towards reliable spike-train recordings  
1443 from thousands of neurons with multielectrodes. *Current opinion in neurobiology* 22 (1), 11–17.  
1444 URL <https://doi.org/10.1016/j.conb.2011.10.001>
- 1445 Einevoll, G. T., Kayser, C., Logothetis, N. K., Panzeri, S., 2013. Modelling and analysis of local field potentials  
1446 for studying the function of cortical circuits. *Nature Reviews Neuroscience* 14 (11), 770.  
1447 URL <https://doi.org/10.1038/nrn3599>
- 1448 Einevoll, G. T., Pettersen, K. H., Devor, A., Ulbert, I., Halgren, E., Dale, A. M., Mar 2007. Laminar population  
1449 analysis: estimating firing rates and evoked synaptic activity from multielectrode recordings in rat barrel  
1450 cortex. *J Neurophysiol* 97 (3), 2174–2190.  
1451 URL <https://doi.org/10.1152/jn.00845.2006>
- 1452 Foster, I., 1995. *Designing and building parallel programs: concepts and tools for parallel software engineer-*  
1453 *ing*. Addison-Wesley Longman Publishing Co., Inc. Boston, MA, USA, Reading, Mass.

- 1454 Franke, F., Natora, M., Meier, P., Hagen, E., Pettersen, K. H., Linden, H., Einevoll, G. T., Obermayer, K., 2010.  
1455 An automated online positioning system and simulation environment for multi-electrodes in extracellular  
1456 recordings. In: 2010 Annual International Conference of the IEEE Engineering in Medicine and Biology.  
1457 IEEE, pp. 593–597.  
1458 URL <https://doi.org/10.1109/IEMBS.2010.5626631>
- 1459 Fuhrmann, G., Segev, I., Markram, H., Tsodyks, M., 2002. Coding of temporal information by activity-  
1460 dependent synapses. *Journal of neurophysiology* 87 (1), 140–148.  
1461 URL <https://doi.org/10.1152/jn.00258.2001>
- 1462 Głąbska, H., Potworowski, J., Łęski, S., Wójcik, D. K., 2014. Independent components of neural activity carry  
1463 information on individual populations. *PloS one* 9, e105071.  
1464 URL <https://doi.org/10.1371/journal.pone.0105071>
- 1465 Głąbska, H. T., Norheim, E., Devor, A., Dale, A. M., Einevoll, G. T., Wójcik, D. K., 2016. Generalized laminar  
1466 population analysis (gLPA) for interpretation of multielectrode data from cortex. *Frontiers in neuroinformatics*  
1467 10.  
1468 URL <https://doi.org/10.3389/fninf.2016.00001>
- 1469 Gleeson, P., Crook, S., Cannon, R. C., Hines, M. L., Billings, G. O., Farinella, M., Morse, T. M., Davison, A. P.,  
1470 Ray, S., Bhalla, U. S., et al., 2010. NeuroML: a language for describing data driven models of neurons and  
1471 networks with a high degree of biological detail. *PLoS computational biology* 6 (6), e1000815.  
1472 URL <https://doi.org/10.1371/journal.pcbi.1000815>
- 1473 Gold, C., Henze, D. A., Koch, C., 2007. Using extracellular action potential recordings to constrain compart-  
1474 mental models. *Journal of computational neuroscience* 23 (1), 39–58.  
1475 URL <https://doi.org/10.1007/s10827-006-0018-2>
- 1476 Gold, C., Henze, D. A., Koch, C., Buzsáki, G., 2006. On the origin of the extracellular action potential waveform:  
1477 a modeling study. *Journal of neurophysiology* 95 (5), 3113–3128.  
1478 URL <https://doi.org/10.1152/jn.00979.2005>
- 1479 Goldwyn, J. H., Rinzel, J., 2016. Neuronal coupling by endogenous electric fields: cable theory and appli-  
1480 cations to coincidence detector neurons in the auditory brain stem. *Journal of neurophysiology* 115 (4),  
1481 2033–2051.  
1482 URL <https://doi.org/10.1152/jn.00780.2015>
- 1483 Goto, T., Hatanaka, R., Ogawa, T., Sumiyoshi, A., Riera, J., Kawashima, R., 2010. An evaluation of the con-  
1484 ductivity profile in the somatosensory barrel cortex of wistar rats. *Journal of neurophysiology* 104 (6), 3388–  
1485 3412.  
1486 URL <https://doi.org/10.1152/jn.00122.2010>
- 1487 Gratiy, S. L., Devor, A., Einevoll, G. T., Dale, A. M., 2011. On the estimation of population-specific synaptic  
1488 currents from laminar multielectrode recordings. *Frontiers in neuroinformatics* 5, 32.  
1489 URL <https://doi.org/10.3389/fninf.2011.00032>
- 1490 Grienberger, C., Konnerth, A., 2012. Imaging calcium in neurons. *Neuron* 73 (5), 862–885.  
1491 URL <https://doi.org/10.1016/j.neuron.2012.02.011>
- 1492 Grinvald, A., Hildesheim, R., Nov. 2004. VSDI: a new era in functional imaging of cortical dynamics. *Nature*  
1493 *Reviews Neuroscience* 5, 874–885.  
1494 URL <https://doi.org/10.1038/nrn1536>

- 1495 Hafting, T., Fyhn, M., Molden, S., Moser, M.-B., Moser, E. I., 2005. Microstructure of a spatial map in the  
1496 entorhinal cortex. *Nature* 436, 801–806.  
1497 URL <https://doi.org/10.1038/nature03721>
- 1498 Hagen, E., Dahmen, D., Stavrinou, M. L., Lindén, H., Tetzlaff, T., van Albada, S. J., Grün, S., Diesmann, M.,  
1499 Einevoll, G. T., Oct 2016. Hybrid scheme for modeling local field potentials from point-neuron networks.  
1500 *Cerebral cortex* 26 (12), 4461–4496.  
1501 URL <https://doi.org/10.1093/cercor/bhw237>
- 1502 Hagen, E., Fossum, J. C., Pettersen, K. H., Alonso, J.-M., Swadlow, H. A., Einevoll, G. T., 2017. Focal local  
1503 field potential (LFP) signature of the single-axon monosynaptic thalamocortical connection. *Journal of Neu-*  
1504 *roscience*, 2715–16.  
1505 URL <https://doi.org/10.1523/JNEUROSCI.2715-16.2017>
- 1506 Hagen, E., Ness, T. V., Khosrowshahi, A., Sørensen, C., Fyhn, M., Hafting, T., Franke, F., Einevoll, G. T., 2015.  
1507 ViSAPy: A Python tool for biophysics-based generation of virtual spiking activity for evaluation of spike-  
1508 sorting algorithms. *Journal of neuroscience methods* 245, 182–204.  
1509 URL <https://doi.org/10.1016/j.jneumeth.2015.01.029>
- 1510 Halnes, G., Mäki-Marttunen, T., Keller, D., Pettersen, K. H., Andreassen, O. A., Einevoll, G. T., 2016. Effect of  
1511 ionic diffusion on extracellular potentials in neural tissue. *PLoS computational biology* 12, e1005193.  
1512 URL <https://doi.org/10.1371/journal.pcbi.1005193>
- 1513 Hämäläinen, M., Hari, R., Ilmoniemi, R. J., Knuutila, J., Lounasmaa, O. V., 1993. Magnetoencephalogra-  
1514 phy—theory, instrumentation, and applications to noninvasive studies of the working human brain. *Reviews*  
1515 *of modern Physics* 65 (2), 413.  
1516 URL <https://doi.org/10.1103/RevModPhys.65.413>
- 1517 Hay, E., Hill, S., Schürmann, F., Markram, H., Segev, I., 2011. Models of neocortical layer 5b pyramidal cells  
1518 capturing a wide range of dendritic and perisomatic active properties. *PLoS Comput Biol* 7 (7), e1002107.  
1519 URL <https://doi.org/10.1371/journal.pcbi.1002107>
- 1520 He, B., Zhang, X., Lian, J., Sasaki, H., Wu, D., Towle, V., 2002. Boundary element method-based cortical  
1521 potential imaging of somatosensory evoked potentials using subjects' magnetic resonance images. *Neu-*  
1522 *rolmage* 16 (3), 564–576.  
1523 URL <https://doi.org/10.1006/nimg.2002.1127>
- 1524 Heiberg, T., Hagen, E., Halnes, G., Einevoll, G. T., 2016. Biophysical network modelling of the dlgn circuit:  
1525 Different effects of triadic and axonal inhibition on visual responses of relay cells. *PLoS Comput Biol* 12 (5),  
1526 e1004929.  
1527 URL <https://doi.org/10.1371/journal.pcbi.1004929>
- 1528 Helmchen, F., Denk, W., Dec. 2005. Deep tissue two-photon microscopy. *Nature methods* 2, 932–940.  
1529 URL <https://doi.org/10.1038/nmeth818>
- 1530 Hines, M. L., Davison, A. P., Muller, E., 2009. NEURON and Python. *Front Neuroinform* 3, 1–12.  
1531 URL <https://doi.org/10.3389/neuro.11.001.2009>
- 1532 Hines, M. L., Markram, H., Schürmann, F., 2008. Fully implicit parallel simulation of single neurons. *Journal of*  
1533 *computational neuroscience* 25 (3), 439–448.  
1534 URL <https://doi.org/10.1007/s10827-008-0087-5>
- 1535 Holt, G. R., Koch, C., 1999. Electrical interactions via the extracellular potential near cell bodies. *Journal of*  
1536 *computational neuroscience* 6, 169–184.  
1537 URL <https://doi.org/10.1023/A:100883270>

- 1538 Huang, Y., Parra, L. C., Haufe, S., 2016. The New York head—a precise standardized volume conductor  
1539 model for EEG source localization and tES targeting. *NeuroImage* 140, 150–162.  
1540 URL <https://doi.org/10.1016/j.neuroimage.2015.12.019>
- 1541 Hubel, D. H., Wiesel, T. N., 1959. Receptive fields of single neurones in the cat's striate cortex. *The Journal*  
1542 *of physiology* 148 (3), 574–591.  
1543 URL <https://www.ncbi.nlm.nih.gov/pmc/articles/PMC1363130/>
- 1544 Koch, C., 1999. *Biophysics of Computation*. Oxford Univ Press, Oxford.
- 1545 Lee, J., Carlson, D., Shokri, H., Yao, W., Goetz, G., Chichilnisky, E., Einevoll, G. T., Hagen, E., Paninski, L.,  
1546 2017. YASS: Yet Another Spike Sorter. In: *Advances in Neural Information Processing Systems 30 (NIPS*  
1547 *2017)*. Curran Associates, Inc., pp. 4002–4012.  
1548 URL <https://papers.nips.cc/paper/6989-yass-yet-another-spike-sorter>
- 1549 Lempka, S. F., McIntyre, C. C., 2013. Theoretical analysis of the local field potential in deep brain stimulation  
1550 applications. *PLoS one* 8 (3), e59839.  
1551 URL <https://doi.org/10.1371/journal.pone.0059839>
- 1552 Li, C. L., Jasper, H., Jul. 1953. Microelectrode studies of the electrical activity of the cerebral cortex in the cat.  
1553 *The Journal of physiology* 121, 117–140.  
1554 URL <https://www.ncbi.nlm.nih.gov/pmc/articles/PMC1366060/>
- 1555 Lindén, H., Hagen, E., Leski, S., Norheim, E. S., Pettersen, K. H., Einevoll, G. T., 2014. LFPy: a tool for  
1556 biophysical simulation of extracellular potentials generated by detailed model neurons. *Frontiers in neuroin-*  
1557 *formatics* 7, 41.  
1558 URL <https://doi.org/10.3389/fninf.2013.00041>
- 1559 Lindén, H., Pettersen, K. H., Einevoll, G. T., 2010. Intrinsic dendritic filtering gives low-pass power spectra of  
1560 local field potentials. *Journal of computational neuroscience* 29 (3), 423–444.  
1561 URL <https://doi.org/10.1007/s10827-010-0245-4>
- 1562 Lindén, H., Tetzlaff, T., Potjans, T. C., Pettersen, K. H., Grün, S., Diesmann, M., Einevoll, G. T., 2011. Modeling  
1563 the spatial reach of the lfp. *Neuron* 72 (5), 859–872.  
1564 URL <https://doi.org/10.1016/j.neuron.2011.11.006>
- 1565 Łęski, S., Lindén, H., Tetzlaff, T., Pettersen, K. H., Einevoll, G. T., 2013. Frequency dependence of signal  
1566 power and spatial reach of the local field potential. *PLoS Comput Biol* 9 (7), e1003137.  
1567 URL <https://doi.org/10.1371/journal.pcbi.1003137>
- 1568 Łęski, S., Pettersen, K. H., Tunstall, B., Einevoll, G. T., Gigg, J., Wójcik, D., 2011. Inverse Current Source  
1569 Density Method in Two Dimensions: Inferring Neural Activation from Multielectrode Recordings. *Neuroin-*  
1570 *formatics* 9 (4), 401–25.  
1571 URL <https://doi.org/10.1007/s12021-011-9111-4>
- 1572 Logg, A., Mardal, K.-A., Wells, G., 2012. Automated solution of differential equations by the finite element  
1573 method: The FEniCS book. Vol. 84. Springer Science & Business Media.
- 1574 Maier, A., Adams, G. K., Aura, C., Leopold, D. A., 2010. Distinct superficial and deep laminar domains of  
1575 activity in the visual cortex during rest and stimulation. *Front Syst Neurosci* 4 (31), 1–11.  
1576 URL <https://doi.org/10.3389/fnsys.2010.00031>
- 1577 Makarova, J., Ibarz, J. M., Makarov, V. A., Benito, N., Herreras, O., 2011. Parallel readout of pathway-specific  
1578 inputs to laminated brain structures. *Frontiers in systems neuroscience* 5, 77.  
1579 URL <https://doi.org/10.3389/fnsys.2011.00077>



- 1580 Malmivuo, J., Plonsey, R., 1995. Bioelectromagnetism. Oxford University Press.
- 1581 Markram, H., Muller, E., Ramaswamy, S., Reimann, M. W., Abdellah, M., Sanchez, C. A., Ailamaki, A., Alonso-  
1582 Nanclares, L., Antille, N., Arsever, S., et al., 2015. Reconstruction and simulation of neocortical microcir-  
1583 cuitry. *Cell* 163 (2), 456–492.  
1584 URL <https://doi.org/10.1016/j.cell.2015.09.029>
- 1585 Markram, H., Toledo-Rodriguez, M., Wang, Y., Gupta, A., Silberberg, G., Wu, C., 2004. Interneurons of the  
1586 neocortical inhibitory system. *Nature Reviews Neuroscience* 5 (10), 793–807.  
1587 URL <https://doi.org/10.1038/nrn1519>
- 1588 Martín-Vázquez, G., Benito, N., Makarov, V. A., Herreras, O., Makarova, J., 2015. Diversity of LFPs activated  
1589 in different target regions by a common CA3 input. *Cerebral Cortex* 26 (10), 4082–4100.  
1590 URL <https://doi.org/10.1093/cercor/bhv211>
- 1591 Martín-Vázquez, G., Makarova, J., Makarov, V. A., Herreras, O., 2013. Determining the true polarity and am-  
1592 plitude of synaptic currents underlying gamma oscillations of local field potentials. *PLoS one* 8 (9), e75499.  
1593 URL <https://doi.org/10.1371/journal.pone.0075499>
- 1594 Mazzoni, A., Lindén, H., Cuntz, H., Lansner, A., Panzeri, S., Einevoll, G. T., 2015. Computing the local field  
1595 potential (lfp) from integrate-and-fire network models. *PLOS Comput Biol* 11 (12), e1004584.  
1596 URL <https://doi.org/10.1371/journal.pcbi.1004584>
- 1597 McColgan, T., Liu, J., Kuokkanen, P. T., Carr, C. E., Hermann, W., Kempster, R., 2017. Dipolar extracellular  
1598 potentials generated by axonal projections. *eLife* 6, 109918.  
1599 URL <https://doi.org/10.7554/eLife.26106>
- 1600 McDougal, R. A., Morse, T. M., Carnevale, T., Marengo, L., Wang, R., Migliore, M., Miller, P. L., Shepherd,  
1601 G. M., Hines, M. L., 2017. Twenty years of ModelDB and beyond: building essential modeling tools for the  
1602 future of neuroscience. *Journal of Computational Neuroscience* 42 (1), 1–10.  
1603 URL <https://doi.org/10.1007/s10827-016-0623-7>
- 1604 McIntyre, C. C., Grill, W. M., Mar. 2001. Finite Element Analysis of the Current-Density and Electric Field  
1605 Generated by Metal Microelectrodes. *Annals of Biomedical Engineering* 29 (3), 227–235.  
1606 URL <https://doi.org/10.1114/1.1352640>
- 1607 Miceli, S., Ness, T. V., Einevoll, G. T., Schubert, D., 2017. Impedance spectrum in cortical tissue: Implications  
1608 for propagation of LFP signals on the microscopic level. *eNeuro* 4 (1), ENEURO.0291–16.  
1609 URL <https://doi.org/10.1523/eneuro.0291-16.2016>
- 1610 Næss, S., 2015. Biophysical modeling of EEG signals from neurons in the brain. Master's thesis, Norwegian  
1611 University of Life Science, Ås.  
1612 URL <http://hdl.handle.net/11250/292868>
- 1613 Næss, S., Chintaluri, H. C., Ness, T. V., Dale, A. M., Einevoll, G. T., Wójcik, D. K., 2017. Corrected four-sphere  
1614 head model for EEG signals. *Frontiers in Human Neuroscience* 11, 490.  
1615 URL <https://doi.org/10.3389/fnhum.2017.00490>
- 1616 Nelson, M. J., Pouget, P., May 2010. Do electrode properties create a problem in interpreting local field  
1617 potential recordings? *J Neurophysiol* 103 (5), 2315–2317.  
1618 URL <https://doi.org/10.1152/jn.00157.2010>
- 1619 Nelson, M. J., Pouget, P., Nilsen, E. A., Patten, C. D., Schall, J. D., 2008. Review of signal distortion through  
1620 metal microelectrode recording circuits and filters. *Journal of neuroscience methods* 169 (1), 141–157.  
1621 URL <https://doi.org/10.1016/j.jneumeth.2007.12.010>

- 1622 Ness, T. V., Chintaluri, C., Potworowski, J., Łęski, S., Głabska, H., Wójcik, D. K., Einevoll, G. T., Oct 2015.  
1623 Modelling and analysis of electrical potentials recorded in microelectrode arrays (MEAs). *Neuroinformatics*  
1624 13, 403–426.  
1625 URL <https://doi.org/10.1007/s12021-015-9265-6>
- 1626 Ness, T. V., Remme, M. W. H., Einevoll, G. T., Jul 2016. Active subthreshold dendritic conductances shape  
1627 the local field potential. *The Journal of physiology* 594, 3809–3825.  
1628 URL <https://doi.org/10.1113/JP272022>
- 1629 Nicholson, C., Freeman, J. A., 1975. Theory of current source-density analysis and determination of conduc-  
1630 tivity tensor for anuran cerebellum. *Journal of neurophysiology* 38 (2), 356–368.  
1631 URL <https://doi.org/10.1152/jn.1975.38.2.356>
- 1632 Nicholson, C., Llinas, R., 1971. Field potentials in the alligator cerebellum and theory of their relationship to  
1633 Purkinje cell dendritic spikes. *J. Neurophysiol.* 34, 509–531.  
1634 URL <https://doi.org/10.1152/jn.1971.34.4.509>
- 1635 Nunez, P. L., Srinivasan, R., 2006. *Electric fields of the brain: the neurophysics of EEG*. Oxford University  
1636 Press, USA.
- 1637 O’Keefe, J., Dostrovsky, J., 1971. The hippocampus as a spatial map. preliminary evidence from unit activity  
1638 in the freely-moving rat. *Brain research* 34 (1), 171–175.  
1639 URL [https://doi.org/10.1016/0006-8993\(71\)90358-1](https://doi.org/10.1016/0006-8993(71)90358-1)
- 1640 Petersen, C. C. H., Grinvald, A., Sakmann, B., 2003. Spatiotemporal dynamics of sensory responses in layer  
1641 2/3 of rat barrel cortex measured in vivo by voltage-sensitive dye imaging combined with whole-cell voltage  
1642 recordings and neuron reconstructions. *The Journal of neuroscience* 23 (4), 1298–1309.  
1643 URL <https://www.ncbi.nlm.nih.gov/pubmed/12598618>
- 1644 Pettersen, K. H., Devor, A., Ulbert, I., Dale, A. M., Einevoll, G. T., Jun 2006. Current-source density estimation  
1645 based on inversion of electrostatic forward solution: effects of finite extent of neuronal activity and conduc-  
1646 tivity discontinuities. *J Neurosci Methods* 154 (1-2), 116–133.  
1647 URL <https://doi.org/10.1016/j.jneumeth.2005.12.005>
- 1648 Pettersen, K. H., Einevoll, G. T., 2008. Amplitude variability and extracellular low-pass filtering of neuronal  
1649 spikes. *Biophysical journal* 94 (3), 784–802.  
1650 URL <https://doi.org/10.1529/biophysj.107.111179>
- 1651 Pettersen, K. H., Hagen, E., Einevoll, G. T., 2008. Estimation of population firing rates and current source  
1652 densities from laminar electrode recordings. *Journal of computational neuroscience* 24 (3), 291–313.  
1653 URL <https://doi.org/10.1007/s10827-007-0056-4>
- 1654 Pettersen, K. H., Lindén, H., Dale, A. M., Einevoll, G. T., 2012. Extracellular spikes and CSD. *Handbook of*  
1655 *Neural Activity Measurement*, 92–135.  
1656 URL <https://doi.org/10.1017/CBO9780511979958.004>
- 1657 Plotnikov, D., Rumpe, B., Blundell, I., Ippen, T., Eppler, J. M., Morrison, A., 2016. NESTML: a modeling lan-  
1658 guage for spiking neurons. *arXiv preprint arXiv:1606.02882*.  
1659 URL <https://arxiv.org/abs/1606.02882>
- 1660 Potjans, T. C., Diesmann, M., 2014. The cell-type specific cortical microcircuit: relating structure and activity  
1661 in a full-scale spiking network model. *Cerebral cortex* 24 (3), 785–806.  
1662 URL <https://doi.org/10.1093/cercor/bhs358>

- 1663 Quiroga, R. Q., Reddy, L., Kreiman, G., Koch, C., Fried, I., 2005. Invariant visual representation by single  
1664 neurons in the human brain. *Nature* 435 (7045), 1102–1107.  
1665 URL <https://doi.org/10.1038/nature03687>
- 1666 Ramaswamy, S., Courcol, J.-D., Abdellah, M., Adaszewski, S. R., Antille, N., Arsever, S., Atenekeng, G., Bilgili,  
1667 A., Brukau, Y., Chalimourda, A., et al., 2015. The neocortical microcircuit collaboration portal: a resource  
1668 for rat somatosensory cortex. *Frontiers in neural circuits* 9, 44.  
1669 URL <https://doi.org/10.3389/fncir.2015.00044>
- 1670 Reimann, M. W., Anastassiou, C. A., Perin, R., Hill, S. L., Markram, H., Koch, C., 2013. A biophysically detailed  
1671 model of neocortical local field potentials predicts the critical role of active membrane currents. *Neuron*  
1672 79 (2), 375–390.  
1673 URL <https://doi.org/10.1016/j.neuron.2013.05.023>
- 1674 Reimann, M. W., King, J. G., Muller, E. B., Ramaswamy, S., Markram, H., 2015. An algorithm to predict the  
1675 connectome of neural microcircuits. *Frontiers in computational neuroscience* 9, 28.  
1676 URL <https://doi.org/10.3389/fncom.2015.00120>
- 1677 Reyes-Puerta, V., Yang, J.-W., Siwek, M. E., Kilb, W., Sun, J.-J., Luhmann, H. J., 2016. Propagation of sponta-  
1678 neous slow-wave activity across columns and layers of the adult rat barrel cortex in vivo. *Brain Struct Funct*  
1679 221 (9), 4429–4449.  
1680 URL <https://doi.org/10.1007/s00429-015-1173-x>
- 1681 Robinson, D. A., 1968. The electrical properties of metal microelectrodes. *Proceedings of the IEEE* 56 (6),  
1682 1065–1071.  
1683 URL <https://doi.org/10.1109/PROC.1968.6458>
- 1684 Rössert, C., Pozzorini, C., Chindemi, G., Davison, A. P., Eroe, C., King, J., Newton, T. H., Nolte, M., Ra-  
1685 maswamy, S., Reimann, M. W., et al., 2016. Automated point-neuron simplification of data-driven microcir-  
1686 cuit models. arXiv:1604.00087 [q-bio.NC].  
1687 URL <https://arxiv.org/abs/1604.00087>
- 1688 Schomburg, E. W., Anastassiou, C. A., Buzsáki, G., Koch, C., 2012. The spiking component of oscillatory  
1689 extracellular potentials in the rat hippocampus. *The Journal of Neuroscience* 32 (34), 11798–11811.  
1690 URL <https://doi.org/10.1523/JNEUROSCI.0656-12.2012>
- 1691 Sinha, M., Narayanan, R., 2015. HCN channels enhance spike phase coherence and regulate the phase of  
1692 spikes and LFPs in the theta-frequency range. *Proceedings of the National Academy of Sciences of the*  
1693 *United States of America* 112 (17), E2207–E2216.  
1694 URL <https://doi.org/10.1073/pnas.1419017112>
- 1695 Smith, K. W., 2015. *Cython: A Guide for Python Programmers*. O'Reilly Media, Inc.
- 1696 Srinivasan, R., Nunez, P. L., Silberstein, R. B., 1998. Spatial filtering and neocortical dynamics: estimates of  
1697 EEG coherence. *IEEE Transactions on Biomedical Engineering* 45 (7), 814–826.  
1698 URL [10.1109/10.686789](https://doi.org/10.1109/10.686789)
- 1699 Taxidis, J., Anastassiou, C. A., Diba, K., Koch, C., Aug 2015. Local field potentials encode place cell ensemble  
1700 activation during hippocampal sharp wave ripples. *Neuron* 87 (3), 590–604.  
1701 URL <https://doi.org/10.1016/j.neuron.2015.07.014>
- 1702 Thorbergsson, P. T., Garwicz, M., Schouenborg, J., Johansson, A. J., Aug 2012. Computationally efficient  
1703 simulation of extracellular recordings with multielectrode arrays. *J Neurosci Methods* 211(1), 133–44.  
1704 URL <https://doi.org/10.1016/j.jneumeth.2012.08.011>

- 1705 Tian, P., Devor, A., Sakadžić, S., Dale, A. M., Boas, D. A., 2011. Monte carlo simulation of the spatial resolution  
1706 and depth sensitivity of two-dimensional optical imaging of the brain. *J Biomed Opt* 16 (1), 016006.  
1707 URL <https://doi.org/10.1117/1.3533263>
- 1708 Tomsett, R. J., Ainsworth, M., Thiele, A., Sanayei, M., Chen, X., Gieselmann, M. A., Whittington, M. A., Cun-  
1709 ningham, M. O., Kaiser, M., Jul 2015. Virtual Electrode Recording Tool for EXtracellular potentials (VER-  
1710 TEX): comparing multi-electrode recordings from simulated and biological mammalian cortical tissue. *Brain*  
1711 *structure & function* 220 (4), 2333–2353.  
1712 URL <https://doi.org/10.1007/s00429-014-0793-x>
- 1713 Tveito, A., Jæger, K. H., Lines, G. T., Paszkowski, Ł., Sundnes, J., Edwards, A. G., Mäki-Marttunen, T., Haldnes,  
1714 G., Einevoll, G. T., 2017. An evaluation of the accuracy of classical models for computing the membrane  
1715 potential and extracellular potential for neurons. *Frontiers in computational neuroscience* 11.  
1716 URL <https://doi.org/10.3389/fncom.2017.00027>
- 1717 Uhlirova, H., Kılıç, K., Tian, P., Thunemann, M., Desjardins, M., Saisan, P. A., Sakadžić, S., Ness, T. V.,  
1718 Mateo, C., Cheng, Q., et al., 2016. Cell type specificity of neurovascular coupling in cerebral cortex. *eLife*  
1719 5, e14315.  
1720 URL <https://doi.org/10.7554/eLife.14315>
- 1721 Vorwerk, J., Cho, J.-H., Rampp, S., Hamer, H., Knösche, T. R., Wolters, C. H., 2014. A guideline for head  
1722 volume conductor modeling in EEG and MEG. *NeuroImage* 100, 590–607.  
1723 URL <https://doi.org/10.1016/j.neuroimage.2014.06.040>
